# Supplementary material for: Comparative Analysis of Milk Triglycerides Profile between Jaffarabadi Buffalo and Holstein Friesian Cow
Source: PubMed Central journal article supplement (PMC7764747; doi:10.3390/metabo10120507), 2020-12-11
Supplement: metabolites-10-00507-s001.pdf [file metabolites-10-00507-s001.pdf]

Figure S1: Schematic of the workflow of the study.

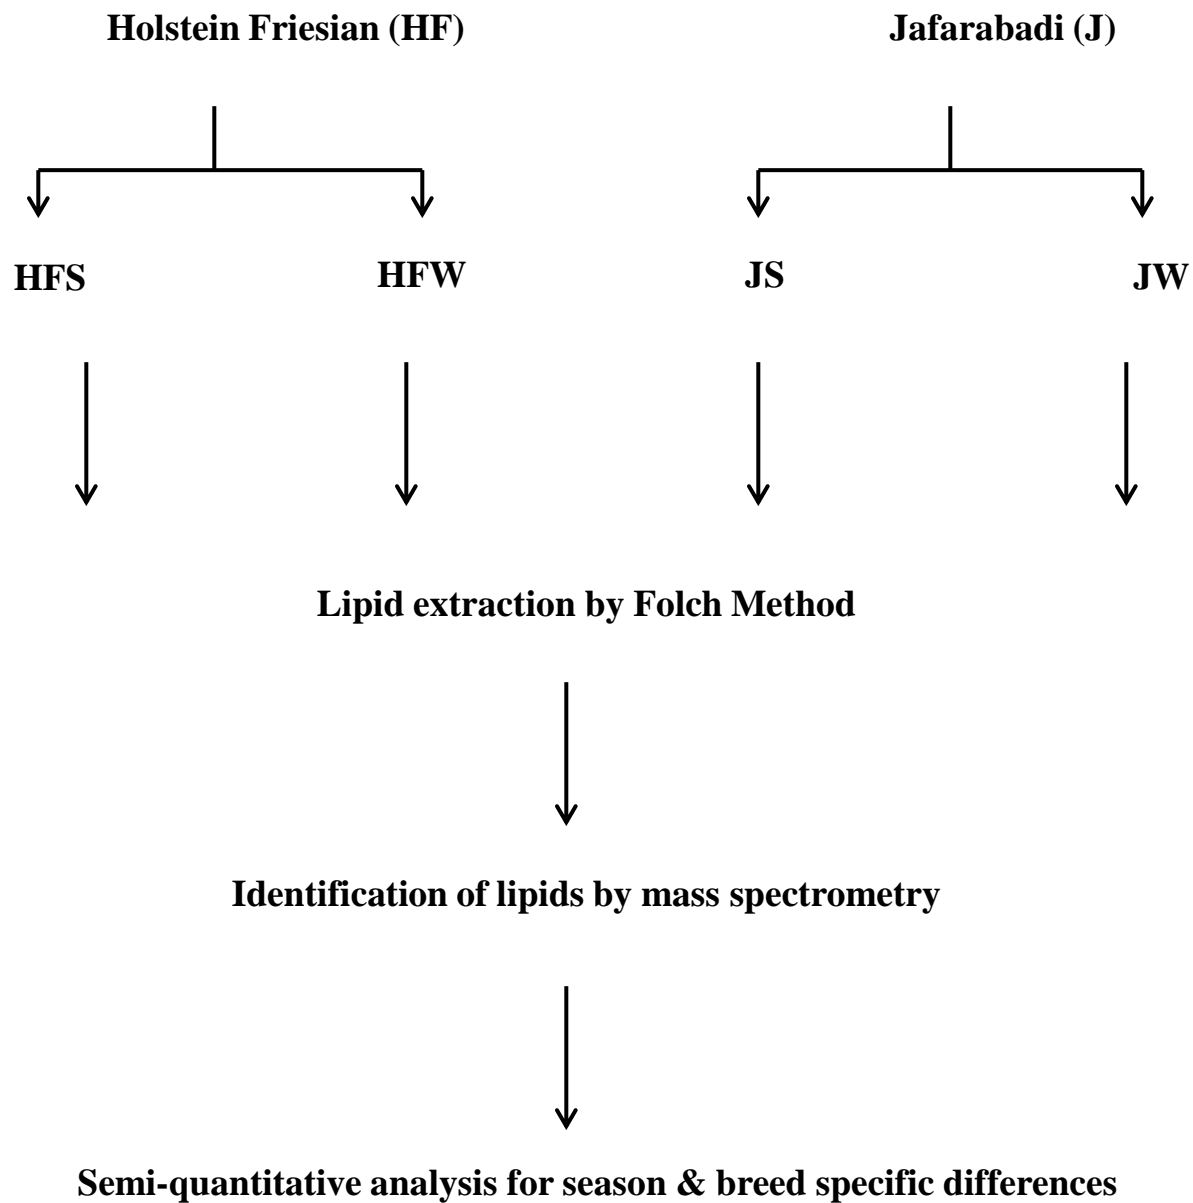

Figure S2: Typical SimLipid software graphical user interface (GUI) showing annotations of an MS/MS spectrum with a lipid ion that has been assigned Mass-ID using MS excel in-built functions.

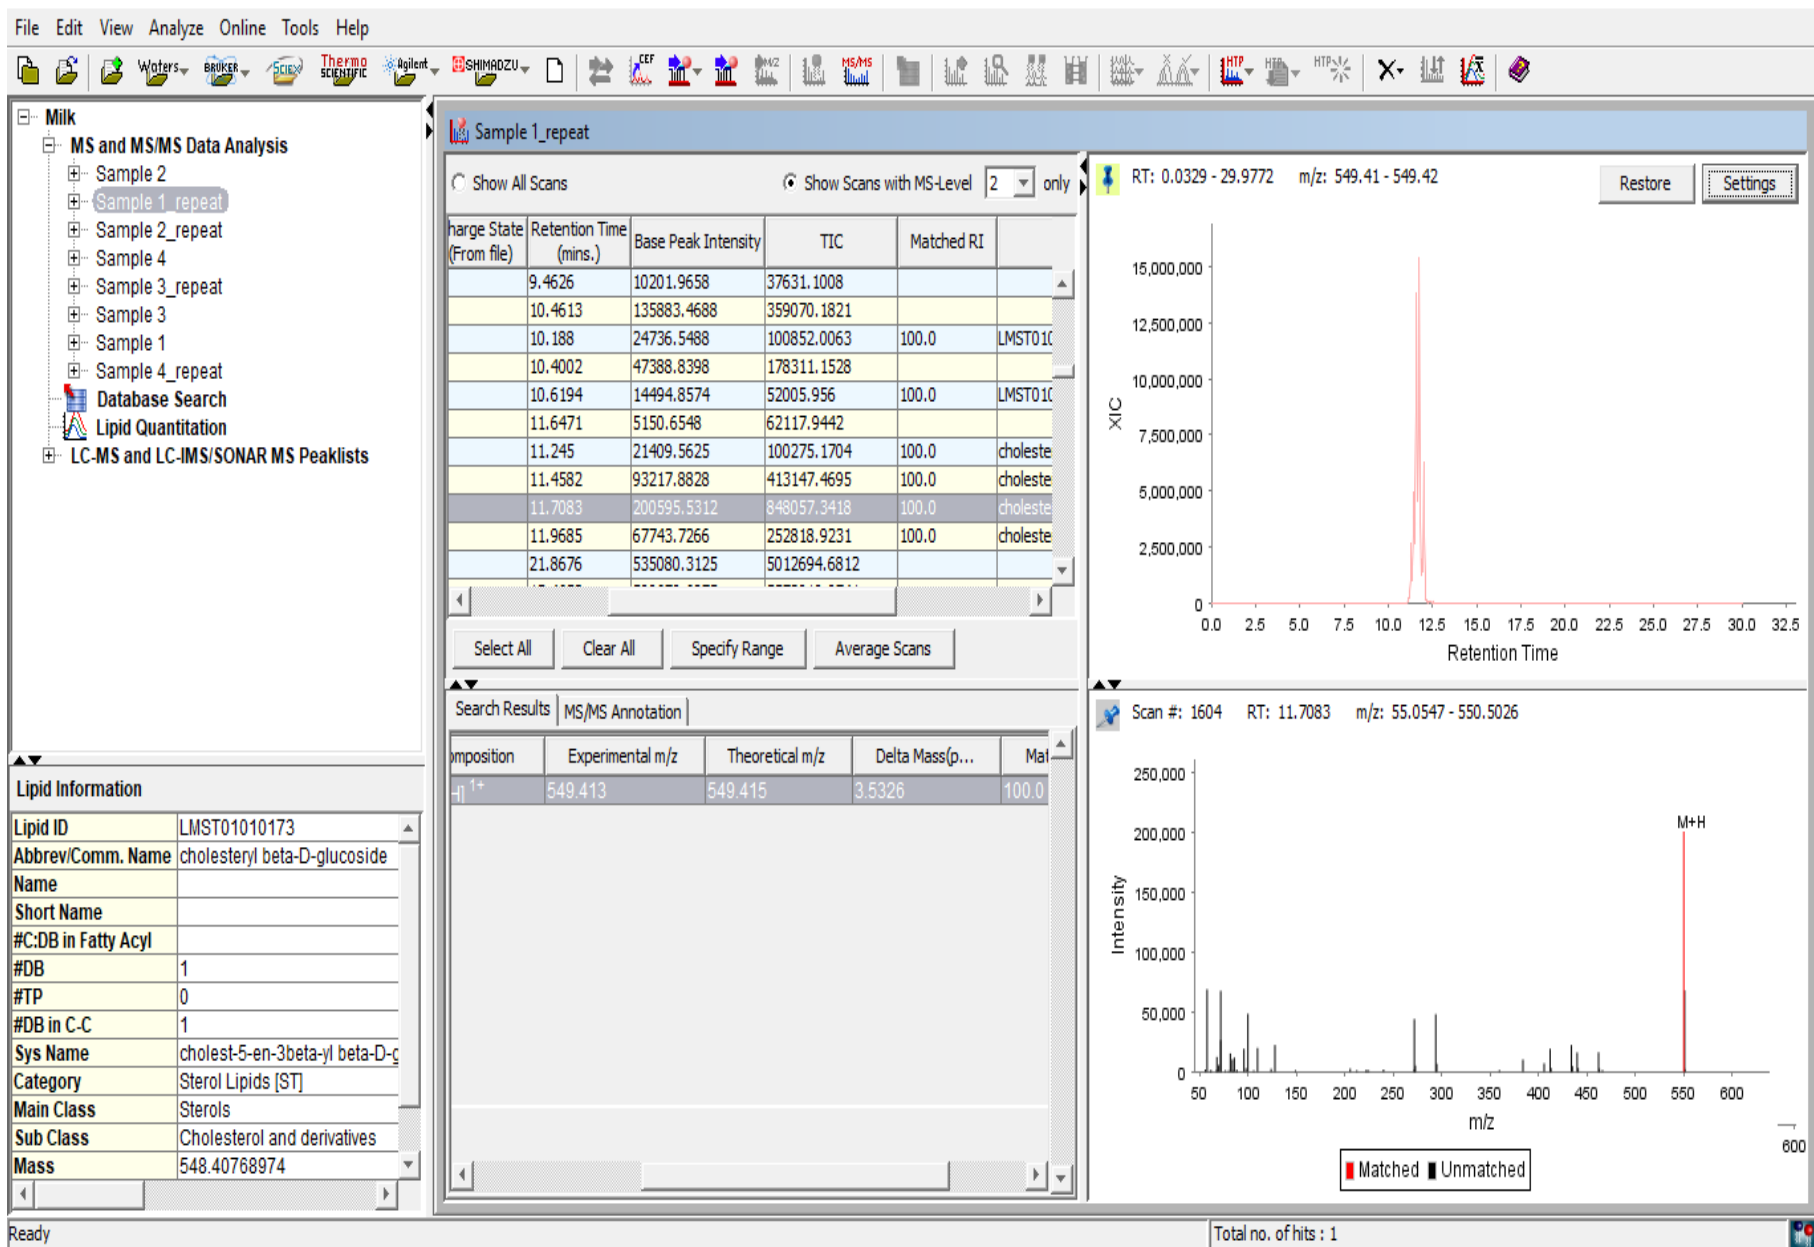

Figure S3: Typical SimLipid software GUI showing annotation of an MS/MS spectrum with a lipid ion that has been assigned Group-ID using MS excel in-built functions.

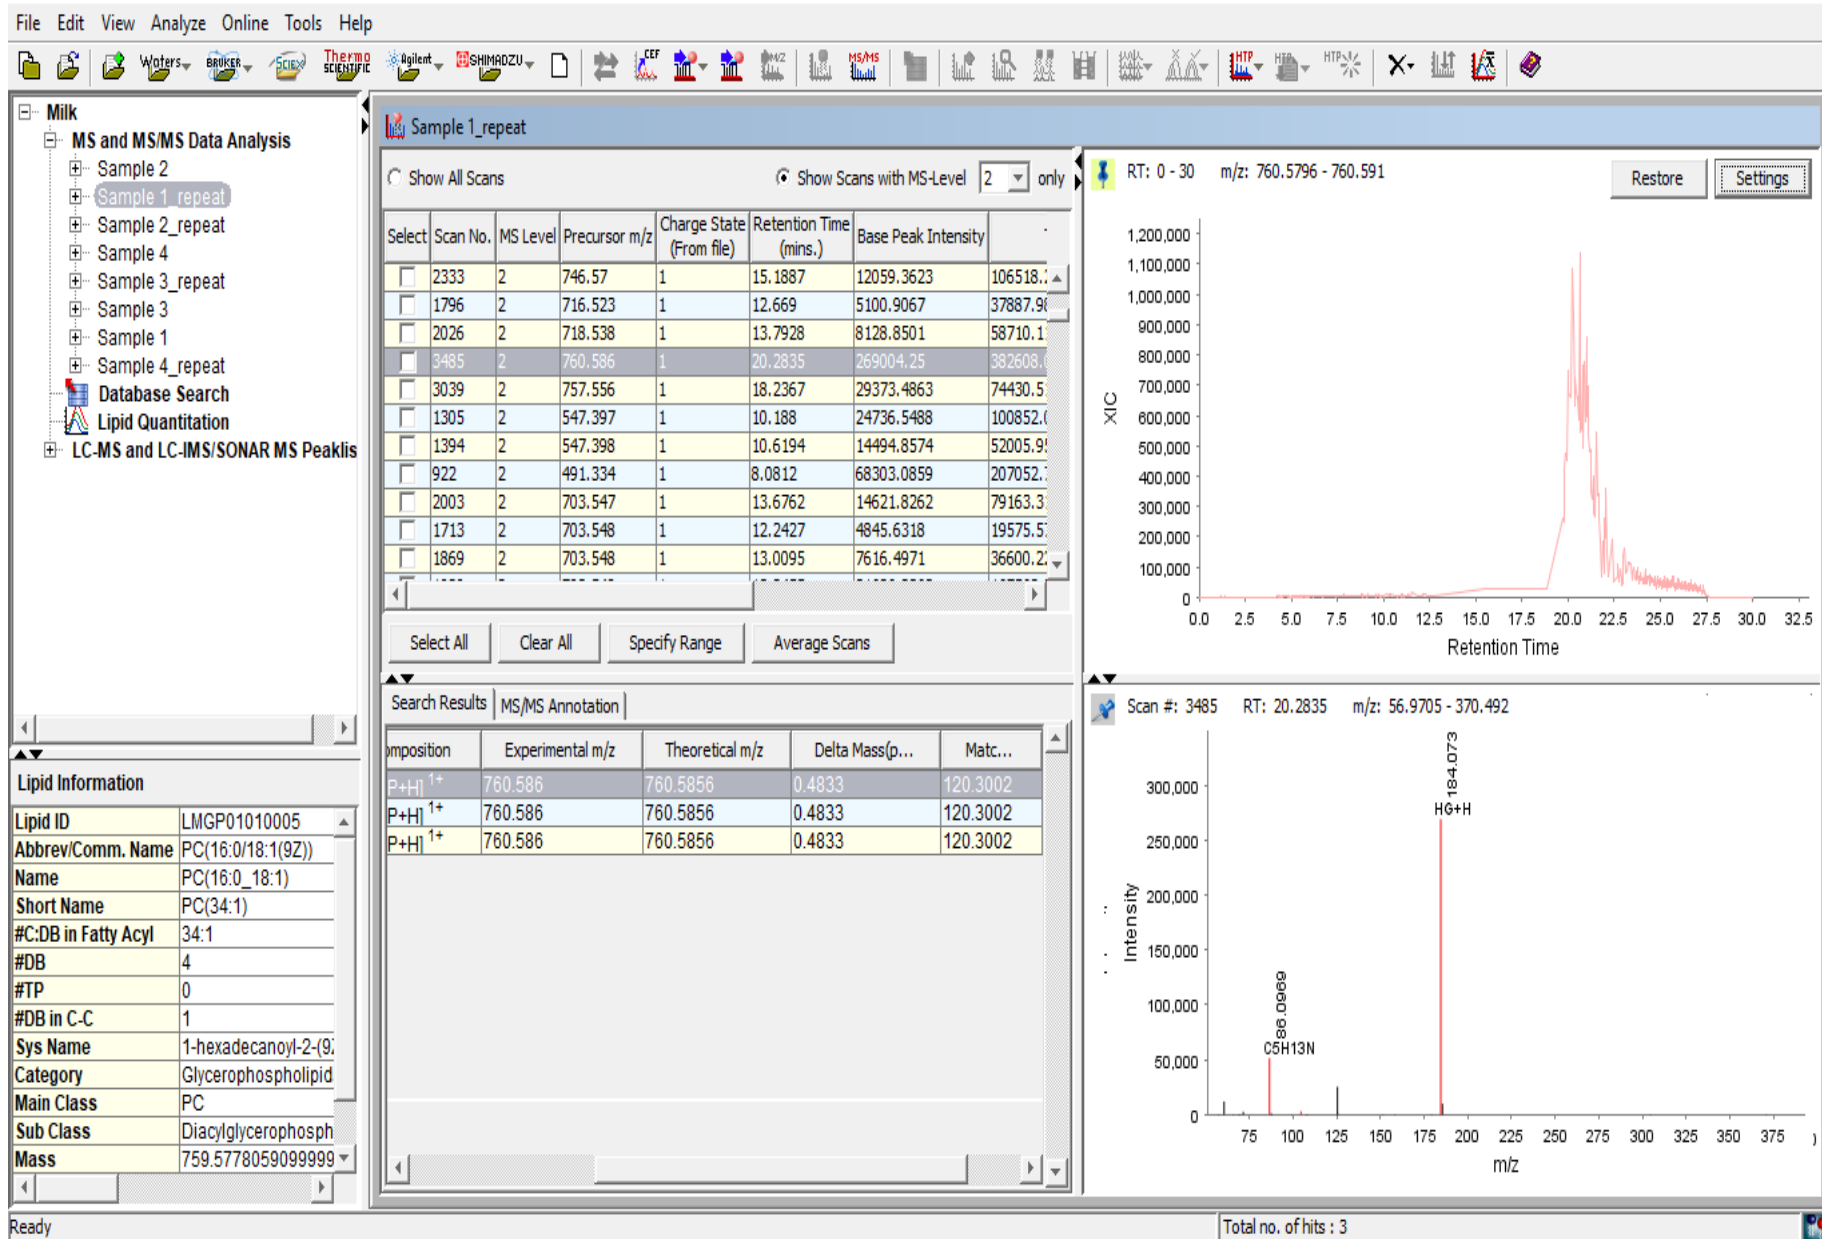

Figure S4: Typical SimLipid software GUI showing annotation of an MS/MS spectrum with a lipid ion that has been assigned PA-ID using MS excel in-built functions.

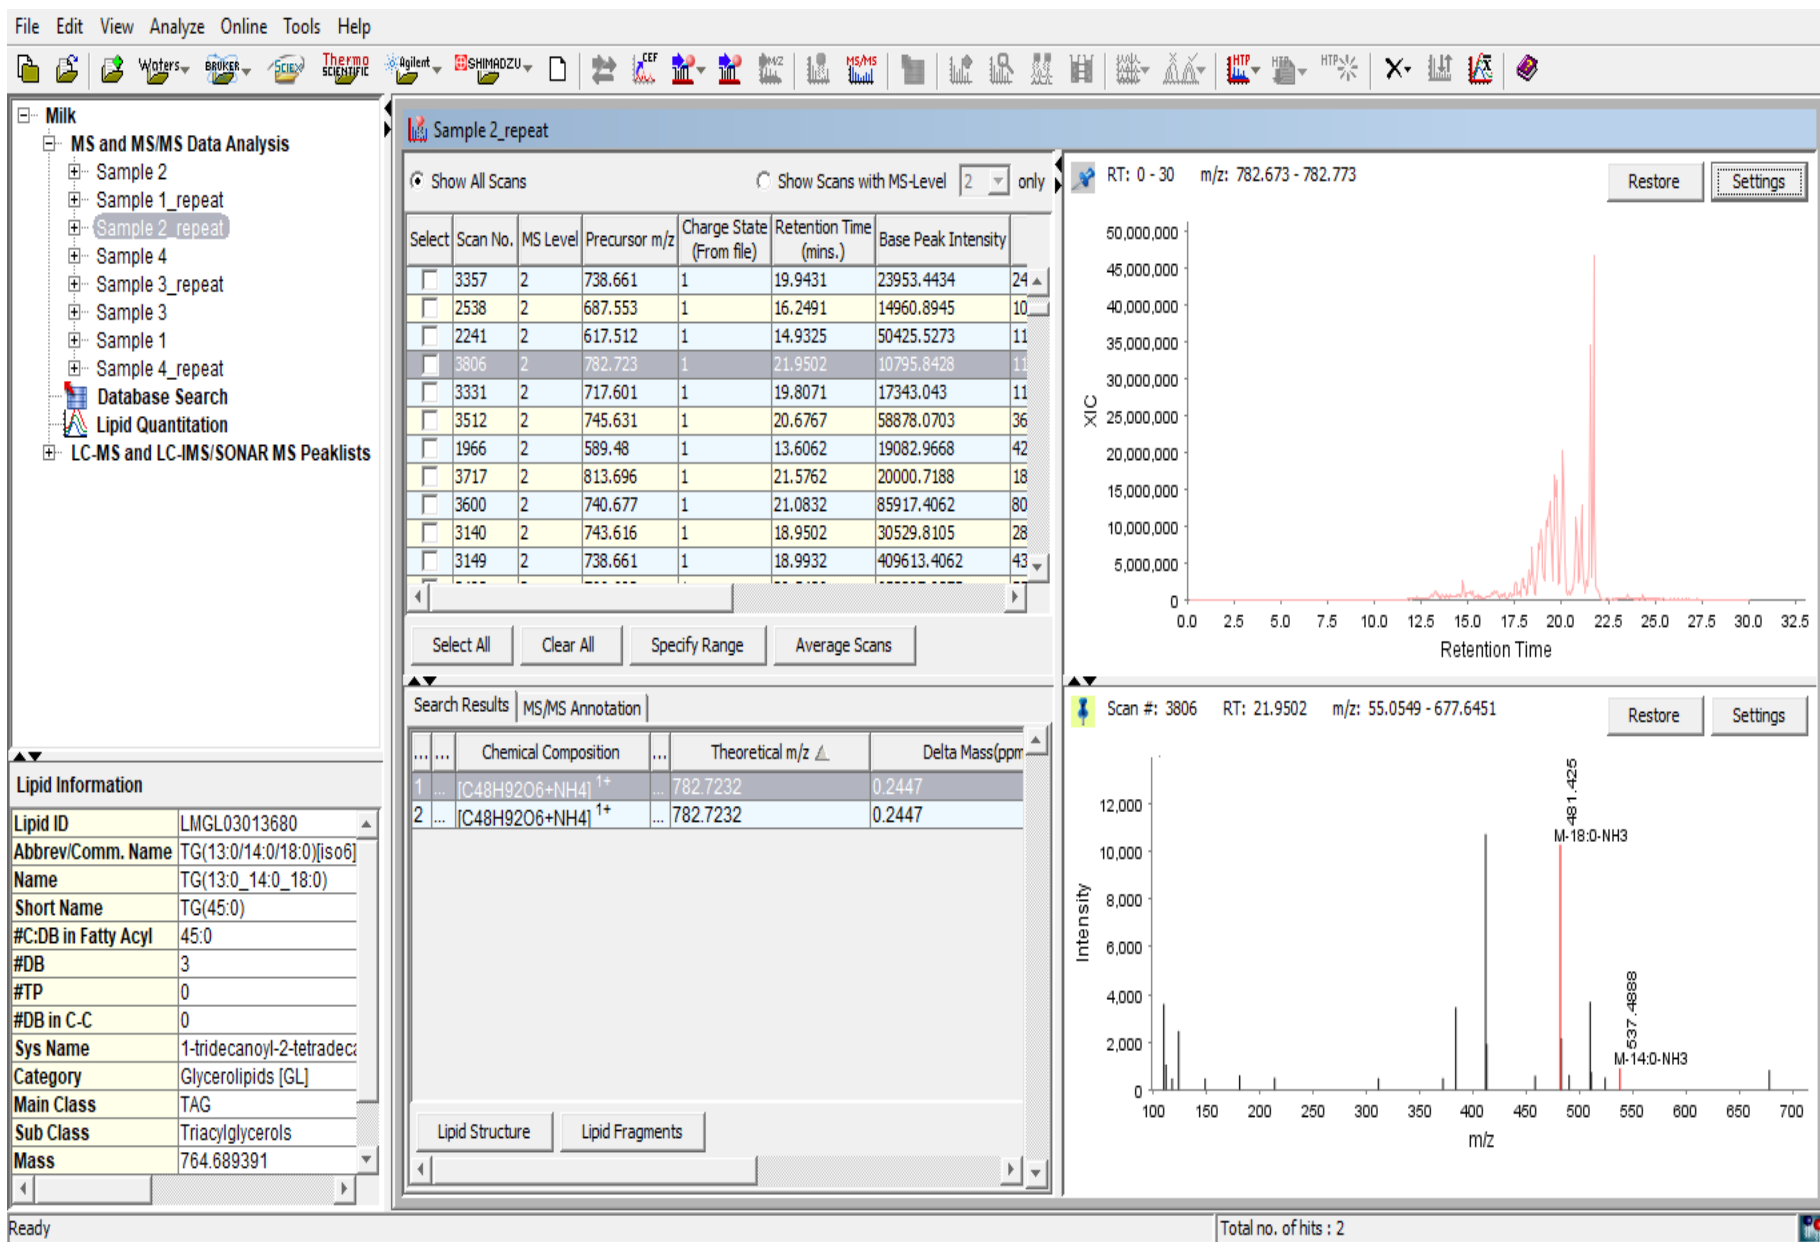

Figure S5: Typical SimLipid software GUI showing annotation of an MS/MS spectrum with a lipid ion that has been assigned FA-ID using MS excel in-built functions.

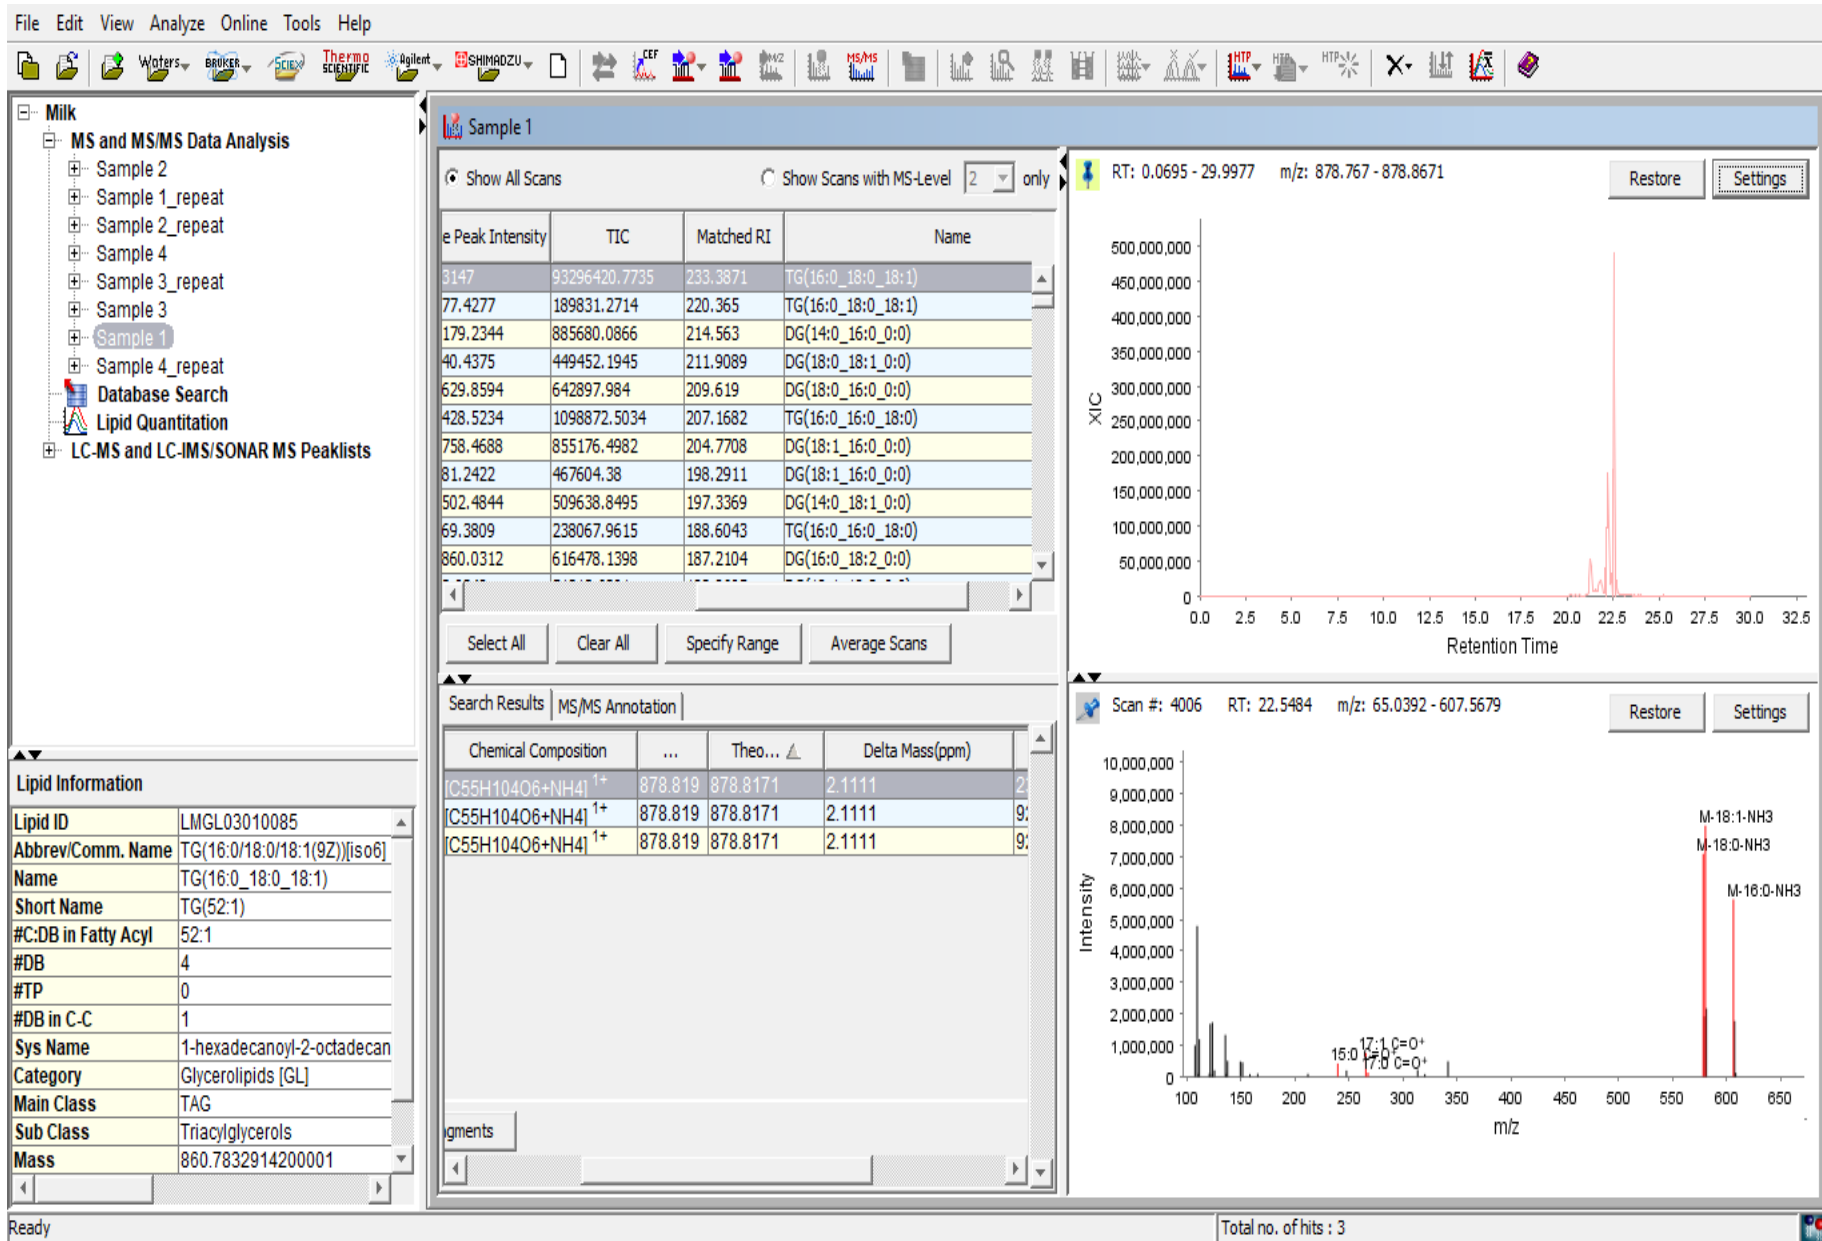

Figure S6: Manual annotation of possible fatty acid chains of the [TG 23:0 + NH<sub>4</sub>]<sup>+</sup> ion using MS/MS data.

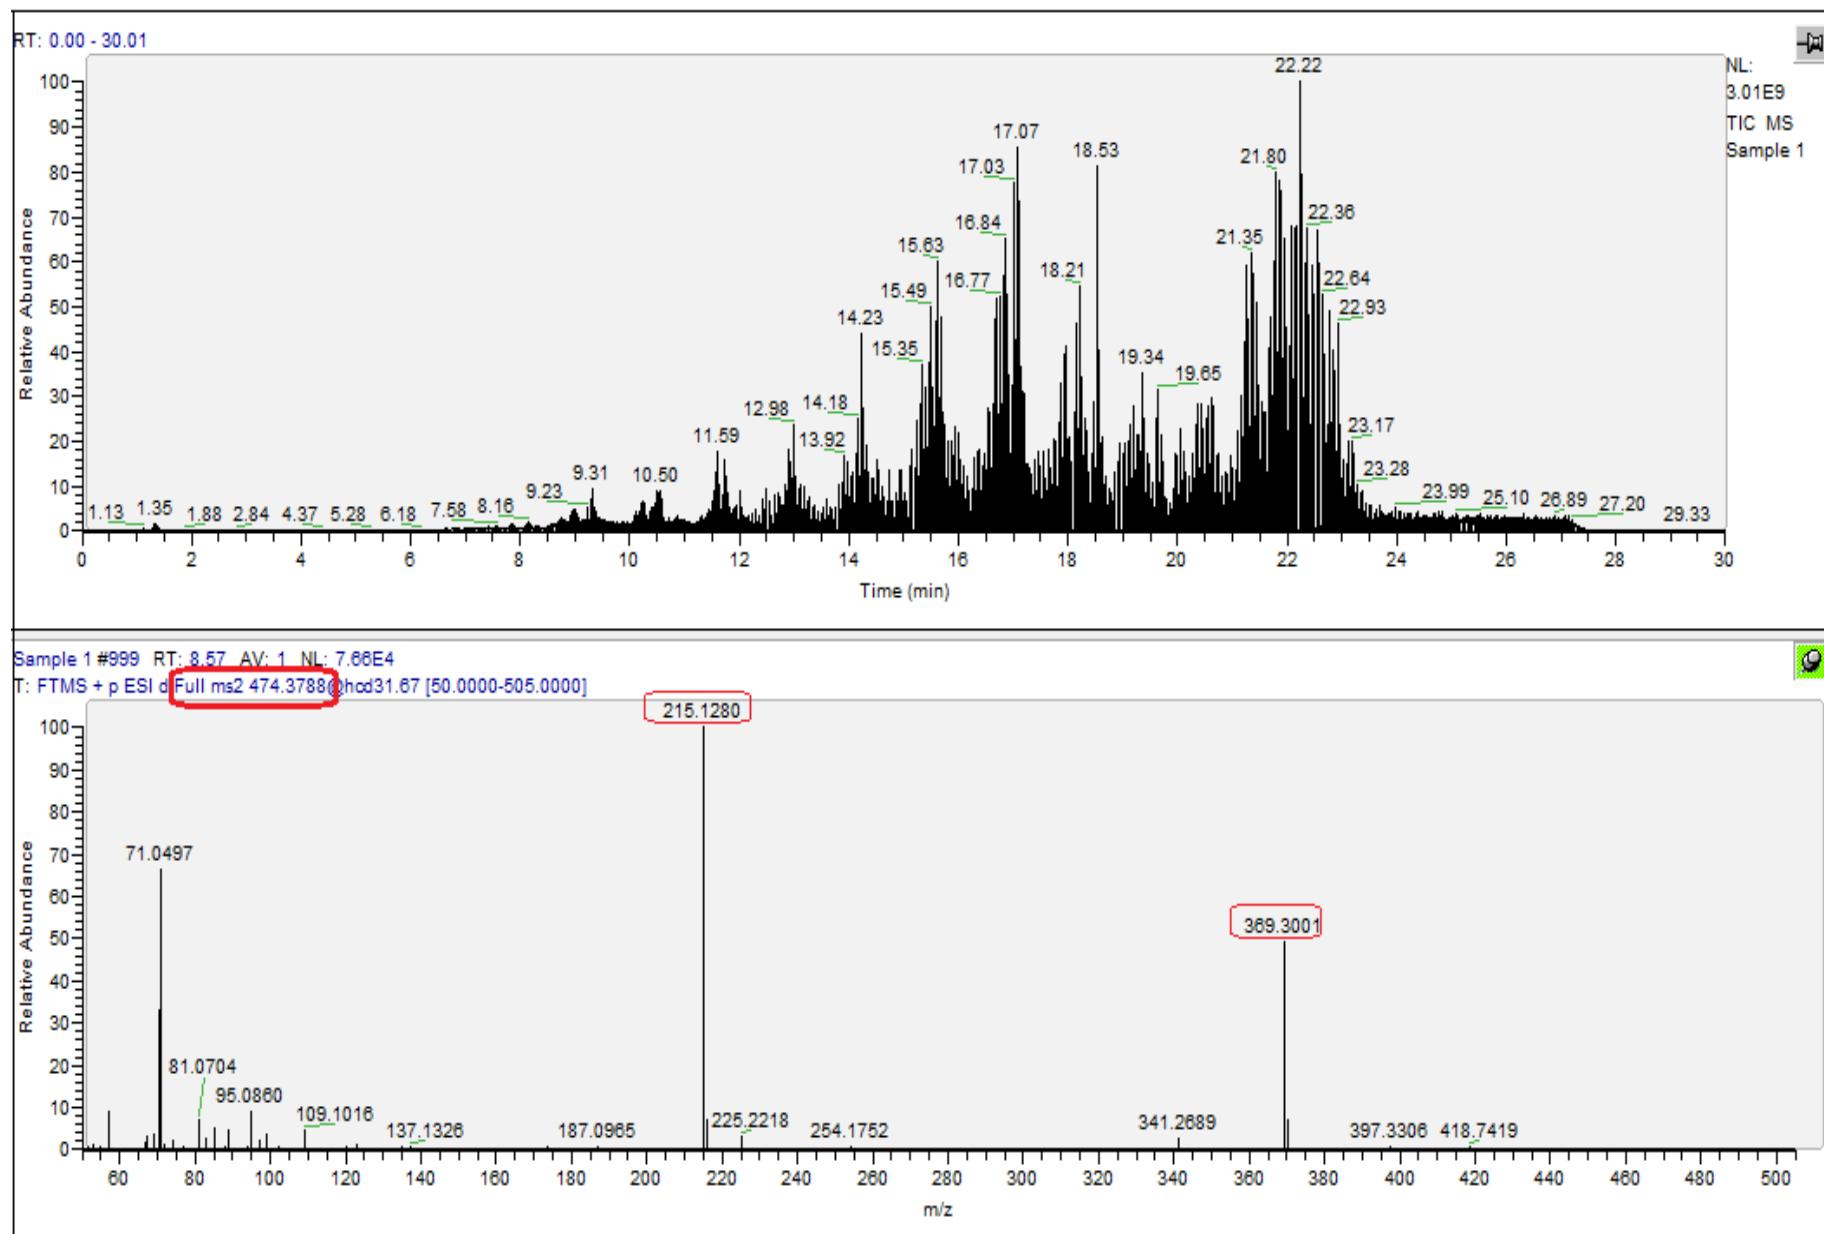

Figure S7: XIC of [PS 36:1+H]<sup>+</sup> ion and isotopic cluster with a monoisotopic peak at m/z 791.5597.

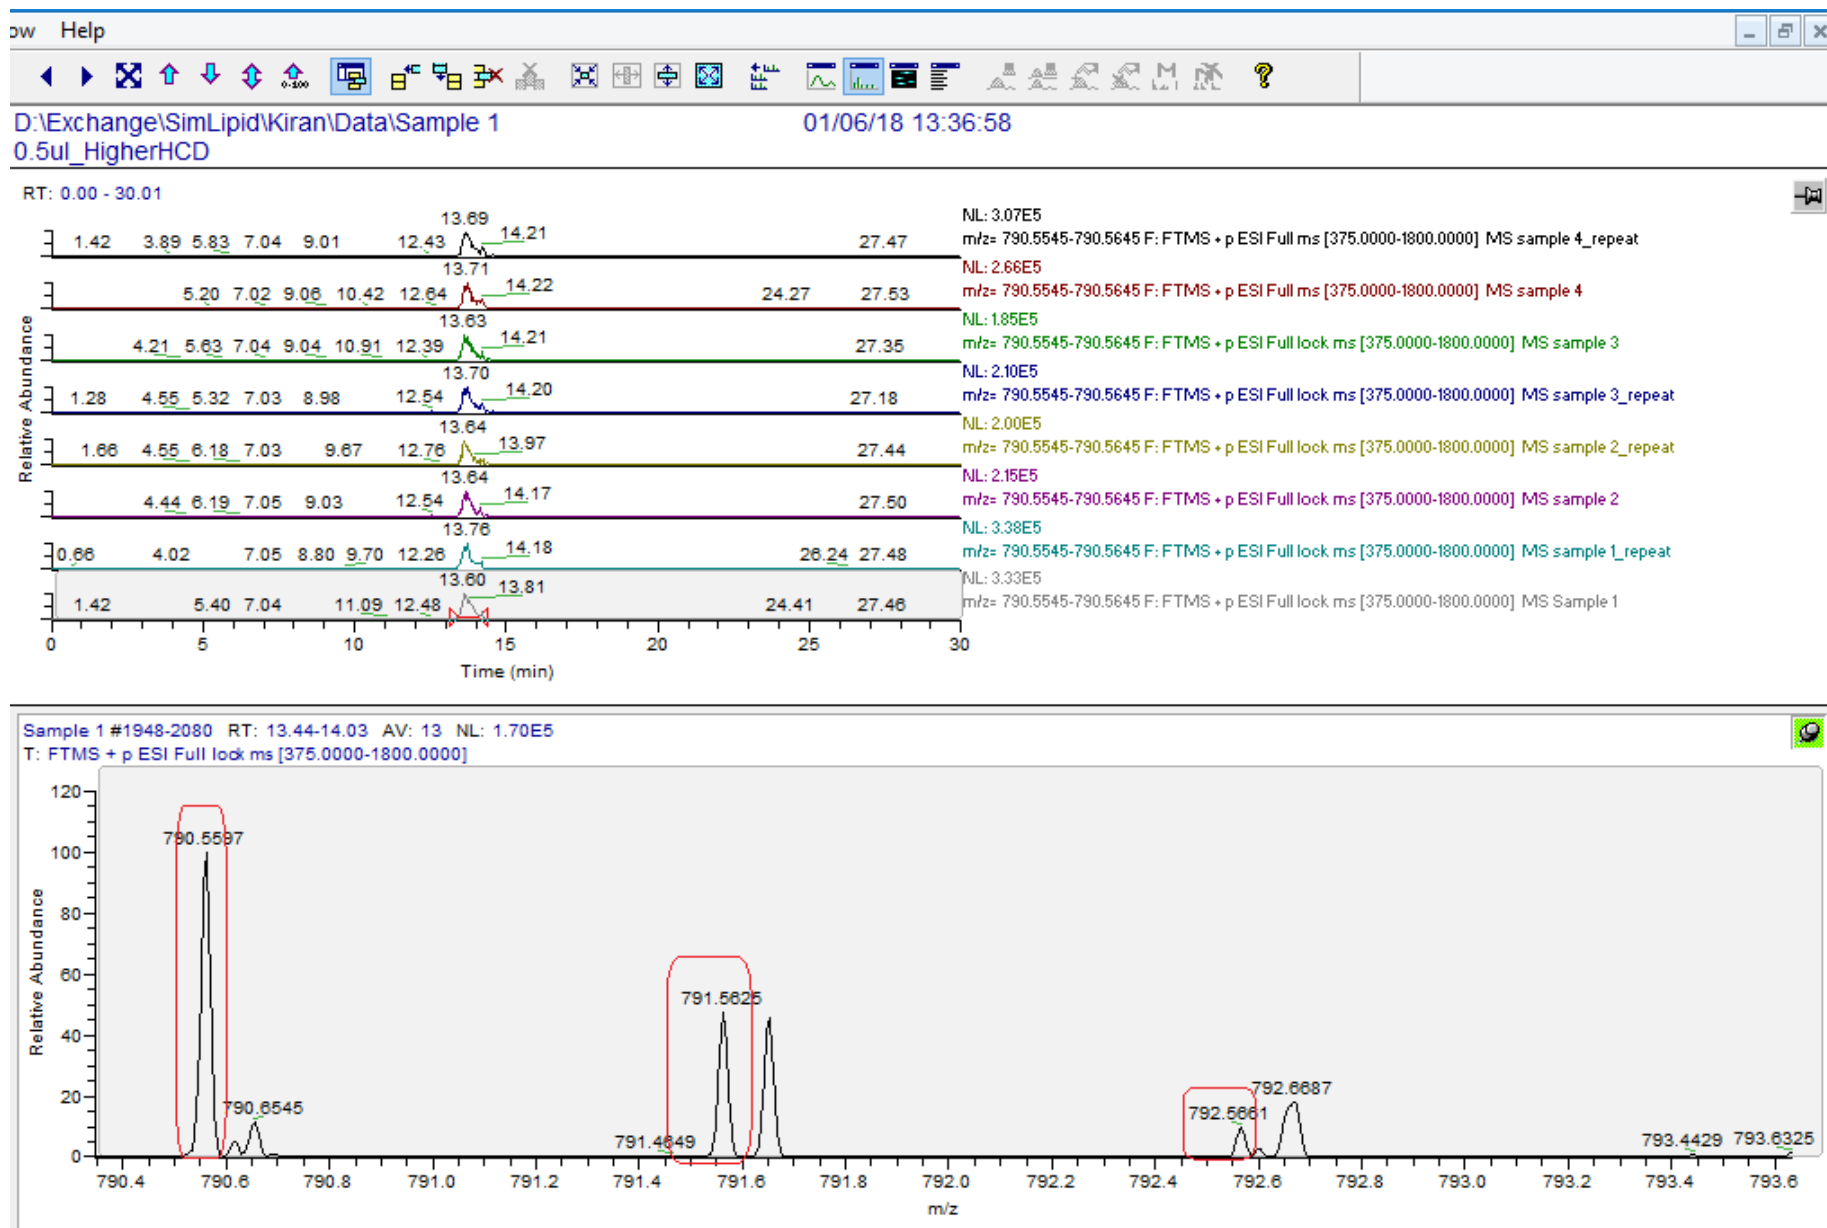

Figure S8 (1): An example MS/MS spectrum of TG 2:0\_4:0\_18:0 that contains 2:0 as one of the fatty acids.

|                                    |                                                                                                                                                    |
|------------------------------------|----------------------------------------------------------------------------------------------------------------------------------------------------|
| File Name                          | Sample 1_repeat                                                                                                                                    |
| Scan #                             | 1199                                                                                                                                               |
| Retention Time                     | 9.617                                                                                                                                              |
| m/z                                | 488.3946                                                                                                                                           |
| Chemical Composition               | [C27H50O6+NH4] 1+                                                                                                                                  |
| LIPIDMAPS Abbreviation/Common Name | TG(2:0/4:0/18:0)                                                                                                                                   |
| Main Class                         | TAG                                                                                                                                                |
| Sub Class                          | Triacylglycerols                                                                                                                                   |
| Lipid ID                           | TG(2:0/4:0/18:0)                                                                                                                                   |
| Theoretical m/z                    | 488.3946                                                                                                                                           |
| Delta Mass                         | 0.0016 ppm                                                                                                                                         |
| Group                              | TG                                                                                                                                                 |
| LSI ID                             | TG 2:0_4:0_18:0                                                                                                                                    |
| Short Name                         | TG 24:0                                                                                                                                            |
| Graded ID                          | TG 2:0_4:0_18:0                                                                                                                                    |
| Matched Ions                       | 3:0 C=O+ _71.0497(67173.1719), M-18:0_187.0967(131318.3906), 17:0 C=O+ _267.2687(2674.231), M-4:0_383.3159(35071.7305), M-2:0_411.3473(13118.2256) |

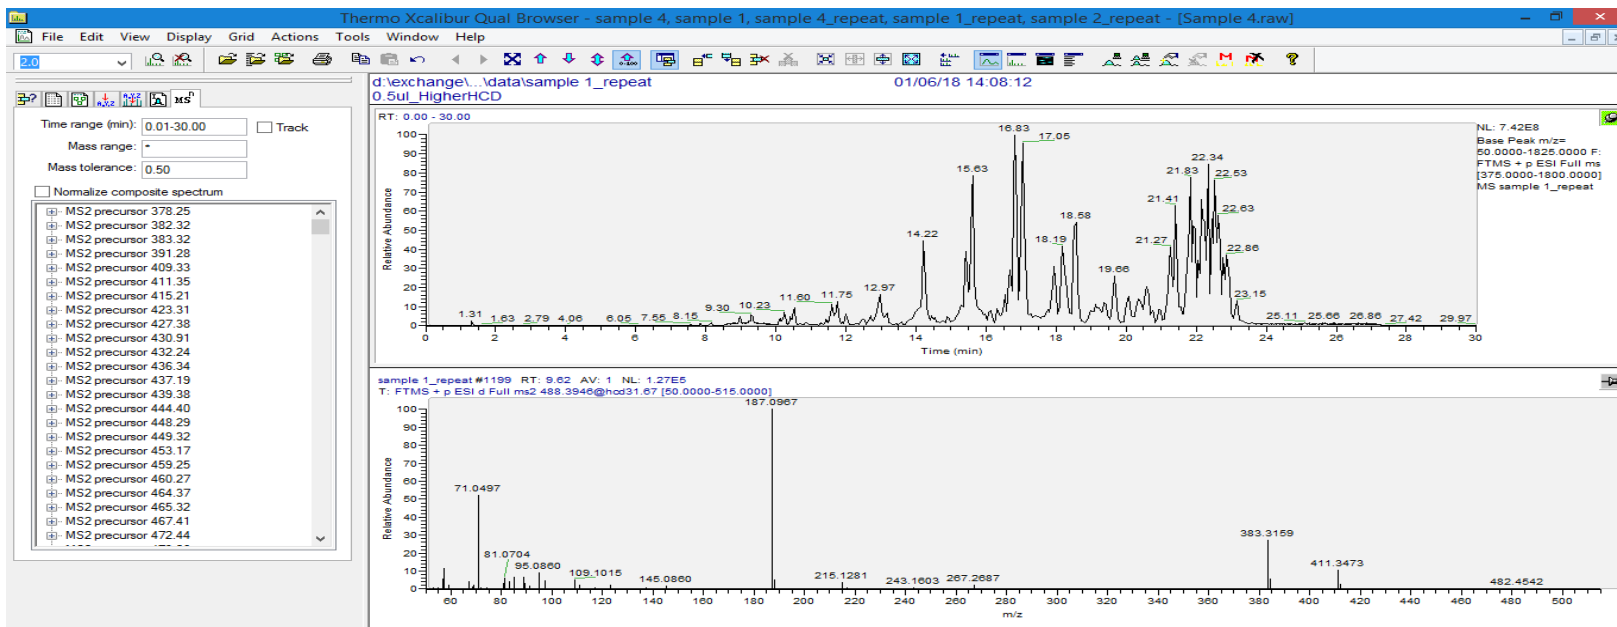



Figure S8 (2): An example MS/MS spectrum of TG 3:0\_16:0\_18:1 that contains 3:0 as one of the fatty acids.

|                                       |                                                                                                                                                                                 |
|---------------------------------------|---------------------------------------------------------------------------------------------------------------------------------------------------------------------------------|
| File Name                             | Sample 4_repeat                                                                                                                                                                 |
| Scan #                                | 2602                                                                                                                                                                            |
| Retention Time                        | 16.3139                                                                                                                                                                         |
| m/z                                   | 668.5829                                                                                                                                                                        |
| Chemical Composition                  | [C40H74O6+NH4] 1+                                                                                                                                                               |
| LIPIDMAPS<br>Abbreviation/Common Name | TG(3:0/16:0/18:1(11Z))                                                                                                                                                          |
| Main Class                            | TAG                                                                                                                                                                             |
| Sub Class                             | Triacylglycerols                                                                                                                                                                |
| Lipid ID                              | TG(3:0/16:0/18:1(11Z))                                                                                                                                                          |
| Theoretical m/z                       | 668.5824                                                                                                                                                                        |
| Delta Mass                            | 0.7813 ppm                                                                                                                                                                      |
| Group                                 | TG                                                                                                                                                                              |
| LSI ID                                | TG 3:0_16:0_18:1                                                                                                                                                                |
| Short Name                            | TG 37:1                                                                                                                                                                         |
| Graded ID                             | TG 3:0_16:0_18:1                                                                                                                                                                |
| Matched Ions                          | 2:0 C=O+_57.0342(13167.042), 15:0 C=O+_239.2364(2009.1318), 17:1 C=O+_265.2527(13355.249), M-18:1_369.3007(230710.6875), M-16:0_395.3157(52155.8242), M-3:0_577.5251(3330.9688) |

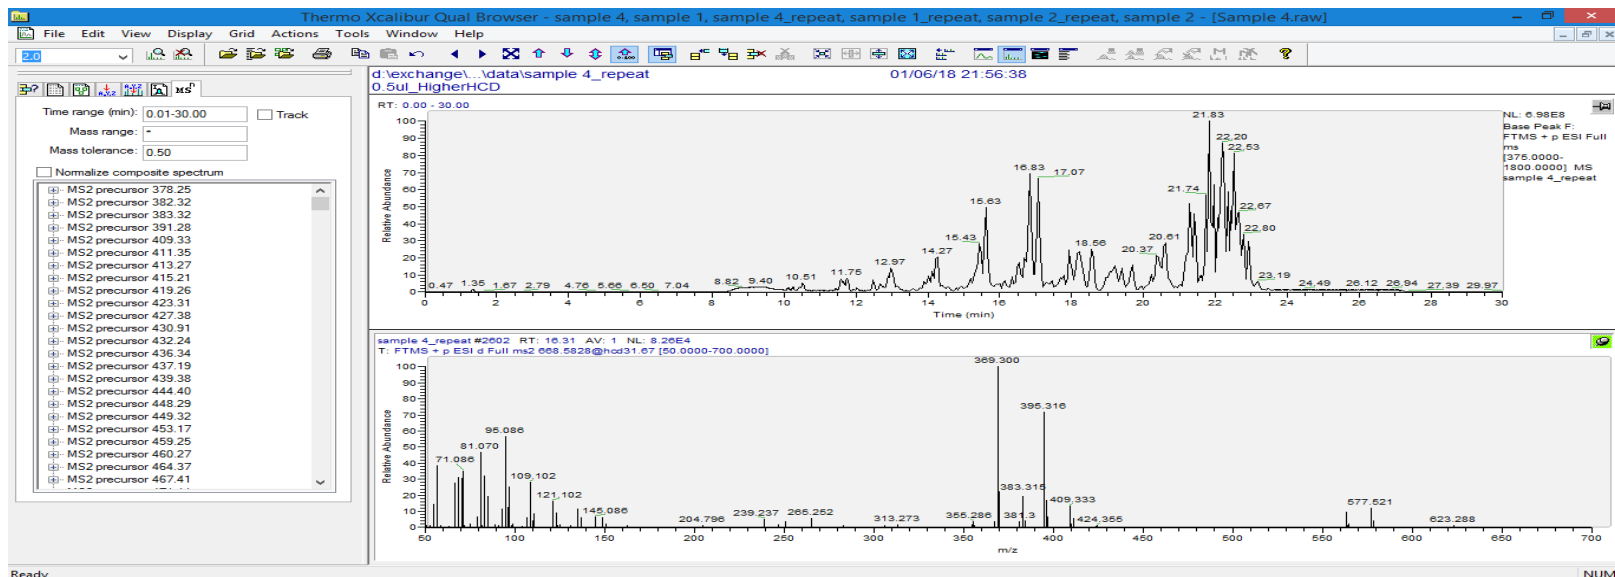

Figure S8 (3): An example MS/MS spectrum of TG 4:0\_6:0\_14:0 that contains the fatty acids 4:0 and 14:0.

|                                       |                                                                                                                                                                                                                                                          |
|---------------------------------------|----------------------------------------------------------------------------------------------------------------------------------------------------------------------------------------------------------------------------------------------------------|
| File Name                             | Sample 1                                                                                                                                                                                                                                                 |
| Scan #                                | 1071                                                                                                                                                                                                                                                     |
| Retention Time                        | 8.9564                                                                                                                                                                                                                                                   |
| m/z                                   | 488.3948                                                                                                                                                                                                                                                 |
| Chemical Composition                  | [C27H50O6+NH4] 1+                                                                                                                                                                                                                                        |
| LIPIDMAPS<br>Abbreviation/Common Name | TG(4:0/6:0/14:0)                                                                                                                                                                                                                                         |
| Main Class                            | TAG                                                                                                                                                                                                                                                      |
| Sub Class                             | Triacylglycerols                                                                                                                                                                                                                                         |
| Lipid ID                              | TG(4:0/6:0/14:0)                                                                                                                                                                                                                                         |
| Theoretical m/z                       | 488.3946                                                                                                                                                                                                                                                 |
| Delta Mass                            | 0.4983 ppm                                                                                                                                                                                                                                               |
| Group                                 | TG                                                                                                                                                                                                                                                       |
| LSI ID                                | TG 4:0_6:0_14:0                                                                                                                                                                                                                                          |
| Short Name                            | TG 24:0                                                                                                                                                                                                                                                  |
| Graded ID                             | TG 4:0_6:0_14:0                                                                                                                                                                                                                                          |
| Matched Ions                          | 3:0 C=O+ <sub>71.0498(419481.9688)</sub> , 5:0 C=O+ <sub>99.081(494175.8438)</sub> , 13:0 C=O+ <sub>211.206(51658.6953)</sub> , M-14:0 <sub>243.1596(112776.875)</sub> , M-6:0 <sub>355.2848(335377.0938)</sub> , M-4:0 <sub>383.3162(361150.9375)</sub> |

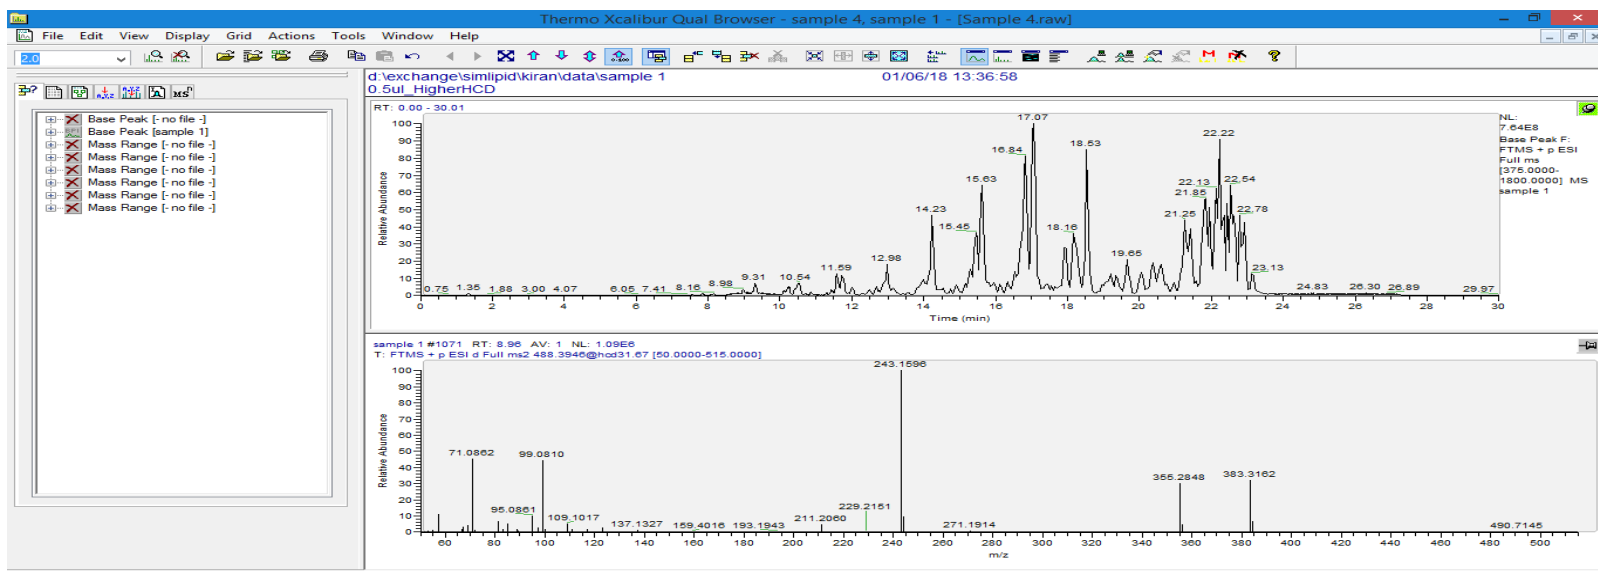

Figure S8 (4): An example MS/MS spectrum of TG 4:0\_5:0\_16:0 that contains 5:0 as one of the fatty acids.

|                          |                                                                                                                                                                                                                                                     |
|--------------------------|-----------------------------------------------------------------------------------------------------------------------------------------------------------------------------------------------------------------------------------------------------|
| File Name                | Sample 1                                                                                                                                                                                                                                            |
| Scan #                   | 1254                                                                                                                                                                                                                                                |
| Retention Time           | 9.9184                                                                                                                                                                                                                                              |
| m/z                      | 502.4103                                                                                                                                                                                                                                            |
| Chemical Composition     | [C28H52O6+NH4] 1+                                                                                                                                                                                                                                   |
| LIPIDMAPS                | TG(4:0/5:0/16:0)                                                                                                                                                                                                                                    |
| Abbreviation/Common Name |                                                                                                                                                                                                                                                     |
| Main Class               | TAG                                                                                                                                                                                                                                                 |
| Sub Class                | Triacylglycerols                                                                                                                                                                                                                                    |
| Lipid ID                 | TG(4:0/5:0/16:0)                                                                                                                                                                                                                                    |
| Theoretical m/z          | 502.4102                                                                                                                                                                                                                                            |
| Delta Mass               | 0.2523 ppm                                                                                                                                                                                                                                          |
| Group                    | TG                                                                                                                                                                                                                                                  |
| LSI ID                   | TG 4:0_5:0_16:0                                                                                                                                                                                                                                     |
| Short Name               | TG 25:0                                                                                                                                                                                                                                             |
| Graded ID                | TG 4:0_5:0_16:0                                                                                                                                                                                                                                     |
| Matched Ions             | 3:0 C=O+ <sub>71.0497(12248.4922)</sub> , 4:0 C=O+ <sub>85.0653(18084.1992)</sub> , M-16:0 <sub>229.1437(49173.2695)</sub> , 15:0 C=O+ <sub>239.2364(496.1783)</sub> , M-5:0 <sub>383.3163(9394.6094)</sub> , M-4:0 <sub>397.3313(11000.4111)</sub> |

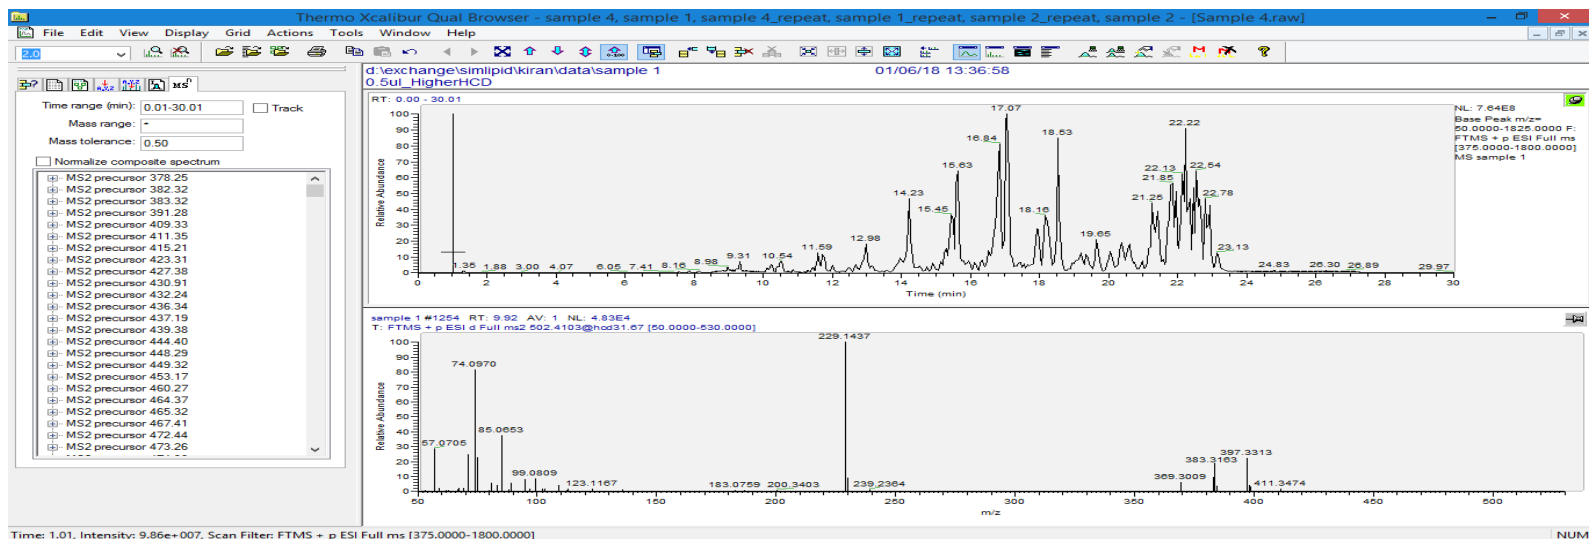

Figure S8 (5): An example MS/MS spectrum of TG(4:0/6:0/14:0) that contains 6:0 as one of the fatty acids.

|                                    |                                                                                                                                                                                                                                                          |
|------------------------------------|----------------------------------------------------------------------------------------------------------------------------------------------------------------------------------------------------------------------------------------------------------|
| File Name                          | Sample 1                                                                                                                                                                                                                                                 |
| Scan #                             | 1071                                                                                                                                                                                                                                                     |
| Retention Time                     | 8.9564                                                                                                                                                                                                                                                   |
| m/z                                | 488.3948                                                                                                                                                                                                                                                 |
| Chemical Composition               | [C27H50O6+NH4] 1+                                                                                                                                                                                                                                        |
| LIPIDMAPS Abbreviation/Common Name | TG(4:0/6:0/14:0)                                                                                                                                                                                                                                         |
| Main Class                         | TAG                                                                                                                                                                                                                                                      |
| Sub Class                          | Triacylglycerols                                                                                                                                                                                                                                         |
| Lipid ID                           | TG(4:0/6:0/14:0)                                                                                                                                                                                                                                         |
| Theoretical m/z                    | 488.3946                                                                                                                                                                                                                                                 |
| Delta Mass                         | 0.4983 ppm                                                                                                                                                                                                                                               |
| Group                              | TG                                                                                                                                                                                                                                                       |
| LSI ID                             | TG 4:0_6:0_14:0                                                                                                                                                                                                                                          |
| Short Name                         | TG 24:0                                                                                                                                                                                                                                                  |
| Graded ID                          | TG 4:0_6:0_14:0                                                                                                                                                                                                                                          |
| Matched Ions                       | 3:0 C=O+ <sub>71.0498(419481.9688)</sub> , 5:0 C=O+ <sub>99.081(494175.8438)</sub> , 13:0 C=O+ <sub>211.206(51658.6953)</sub> , M-14:0 <sub>243.1596(112776.875)</sub> , M-6:0 <sub>355.2848(335377.0938)</sub> , M-4:0 <sub>383.3162(361150.9375)</sub> |

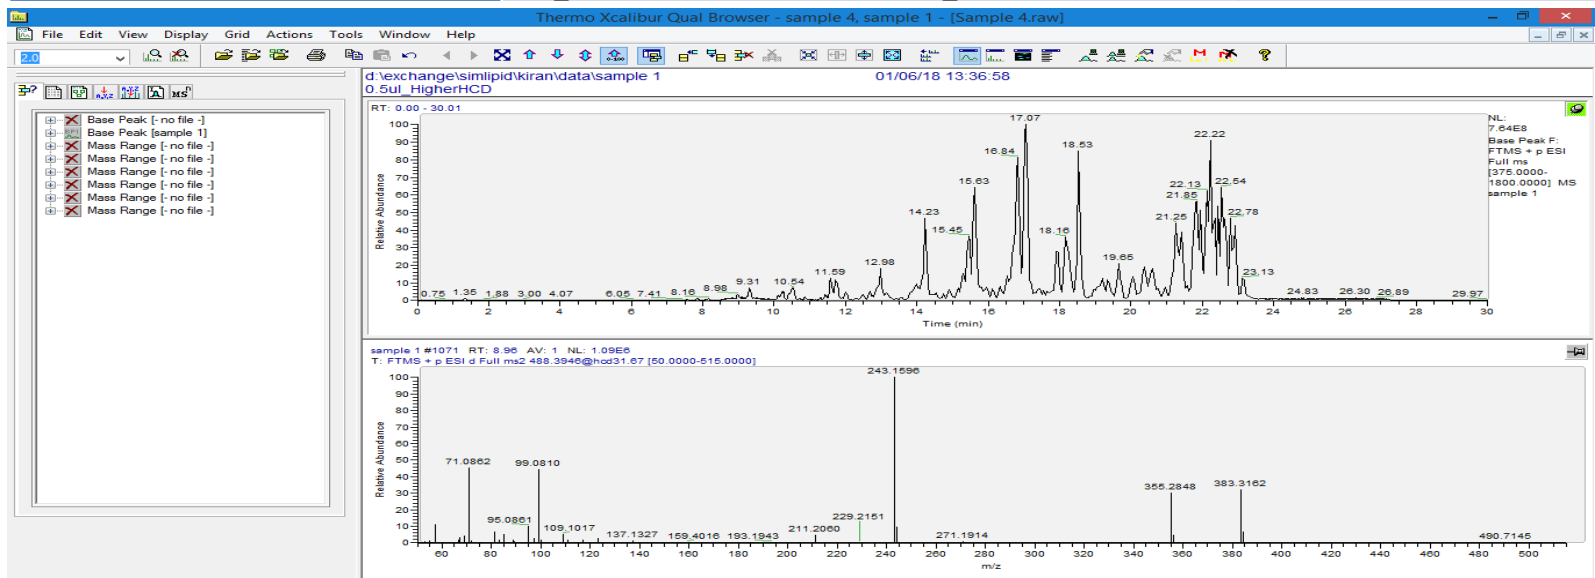

Figure S8 (6): An example MS/MS spectrum of TG 5:0\_7:0\_15:0 that contains the fatty acids 7:0 and 15:0.

|                                       |                                                                                                                                                                           |
|---------------------------------------|---------------------------------------------------------------------------------------------------------------------------------------------------------------------------|
| File Name                             | Sample 1_repeat                                                                                                                                                           |
| Scan #                                | 1480                                                                                                                                                                      |
| Retention Time                        | 11.0791                                                                                                                                                                   |
| m/z                                   | 530.4417                                                                                                                                                                  |
| Chemical Composition                  | [C30H56O6+NH4] <sup>1+</sup>                                                                                                                                              |
| LIPIDMAPS<br>Abbreviation/Common Name | TG(5:0/7:0/15:0)                                                                                                                                                          |
| Main<br>Class                         | TAG                                                                                                                                                                       |
| Sub Class                             | Triacylglycerols                                                                                                                                                          |
| Lipid ID                              | TG(5:0/7:0/15:0)                                                                                                                                                          |
| Theoretical m/z                       | 530.4415                                                                                                                                                                  |
| Delta Mass                            | 0.3746 ppm                                                                                                                                                                |
| Group                                 | TG                                                                                                                                                                        |
| LSI ID                                | TG 5:0_7:0_15:0                                                                                                                                                           |
| Short<br>Name                         | TG 27:0                                                                                                                                                                   |
| Graded ID                             | TG 5:0_7:0_15:0                                                                                                                                                           |
| Matched Ions                          | 4:0 C=O+_85.0653(8174.5039), 6:0 C=O+_113.0961(3476.3364), 14:0 C=O+_225.2221(985.0714), M-15:0_271.1904(39955.7969), M-7:0_383.3148(2001.8545), M-5:0_411.347(8337.6562) |

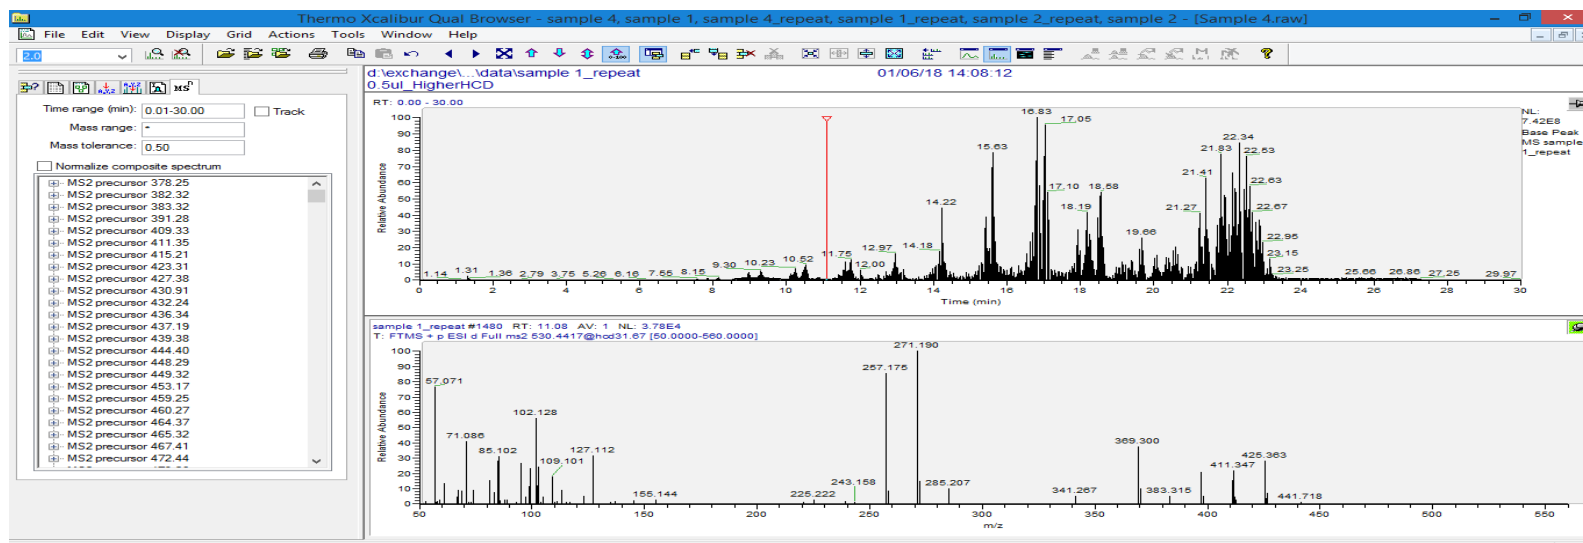

Figure S8 (7): An example MS/MS spectrum of TG(4:0\_8:0\_12:0) that contains the fatty acids 8:0 and 12:0.

|                                    |                                                                                                                                                                                                                                                           |
|------------------------------------|-----------------------------------------------------------------------------------------------------------------------------------------------------------------------------------------------------------------------------------------------------------|
| File Name                          | Sample 1                                                                                                                                                                                                                                                  |
| Scan #                             | 1032                                                                                                                                                                                                                                                      |
| Retention Time                     | 8.7537                                                                                                                                                                                                                                                    |
| m/z                                | 488.3946                                                                                                                                                                                                                                                  |
| Chemical Composition               | [C27H50O6+NH4] <sup>1+</sup>                                                                                                                                                                                                                              |
| LIPIDMAPS Abbreviation/Common Name | TG(4:0/8:0/12:0)                                                                                                                                                                                                                                          |
| Main Class                         | TAG                                                                                                                                                                                                                                                       |
| Sub Class                          | Triacylglycerols                                                                                                                                                                                                                                          |
| Lipid ID                           | TG(4:0/8:0/12:0)                                                                                                                                                                                                                                          |
| Theoretical m/z                    | 488.3946                                                                                                                                                                                                                                                  |
| Delta Mass                         | 0.1234 ppm                                                                                                                                                                                                                                                |
| Group                              | TG                                                                                                                                                                                                                                                        |
| LSI ID                             | TG 4:0_8:0_12:0                                                                                                                                                                                                                                           |
| Short Name                         | TG 24:0                                                                                                                                                                                                                                                   |
| Graded ID                          | TG 4:0_8:0_12:0                                                                                                                                                                                                                                           |
| Matched Ions                       | 3:0 C=O+ <sub>71.0498(128767.0156)</sub> , 7:0 C=O+ <sub>127.1121(118972.9922)</sub> , 11:0 C=O+ <sub>183.1746(27360.0098)</sub> , M-12:0 <sub>271.1907(333331.375)</sub> , M-8:0 <sub>327.2534(131130.4375)</sub> , M-4:0 <sub>383.316(119953.125)</sub> |

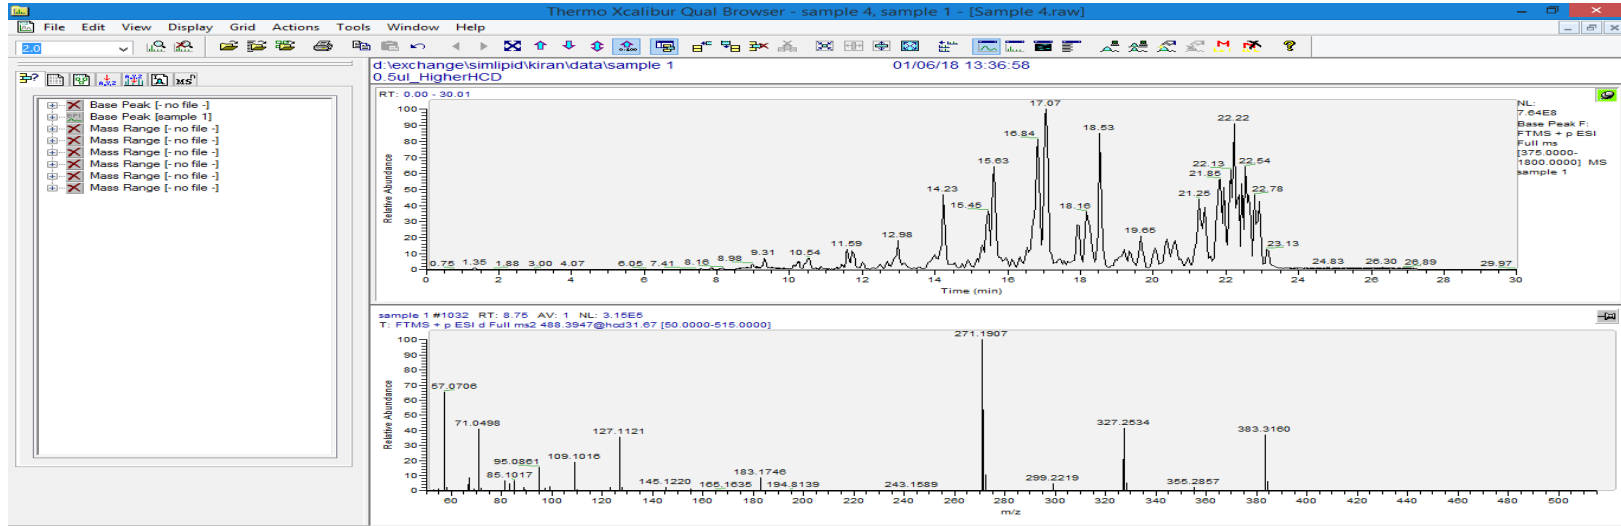

Figure S8 (8): An example MS/MS spectrum of TG 9:0\_14:0\_18:0 that contains 9:0 as one of the fatty acids.

|                                    |                                                                                                                            |
|------------------------------------|----------------------------------------------------------------------------------------------------------------------------|
| File Name                          | Sample 1                                                                                                                   |
| Scan #                             | 3436                                                                                                                       |
| Retention Time                     | 20.0729                                                                                                                    |
| m/z                                | 726.661                                                                                                                    |
| Chemical Composition               | [C44H84O6+NH4] <sup>1+</sup>                                                                                               |
| LIPIDMAPS Abbreviation/Common Name | TG(9:0/14:0/18:0)                                                                                                          |
| Main Class                         | TAG                                                                                                                        |
| Sub Class                          | Triacylglycerols                                                                                                           |
| Lipid ID                           | TG(9:0/14:0/18:0)                                                                                                          |
| Theoretical m/z                    | 726.6606                                                                                                                   |
| Delta Mass                         | 0.5464 ppm                                                                                                                 |
| Group                              | TG                                                                                                                         |
| LSI ID                             | TG 9:0_14:0_18:0                                                                                                           |
| Short Name                         | TG 41:0                                                                                                                    |
| Graded ID                          | TG 9:0_14:0_18:0                                                                                                           |
| Matched Ions                       | 8:0 C=O <sup>+</sup> 141.1293(930.9376), M-18:0 425.3634(30112.082), M-14:0 481.4262(3743.8767), M-9:0 551.5023(2015.0214) |

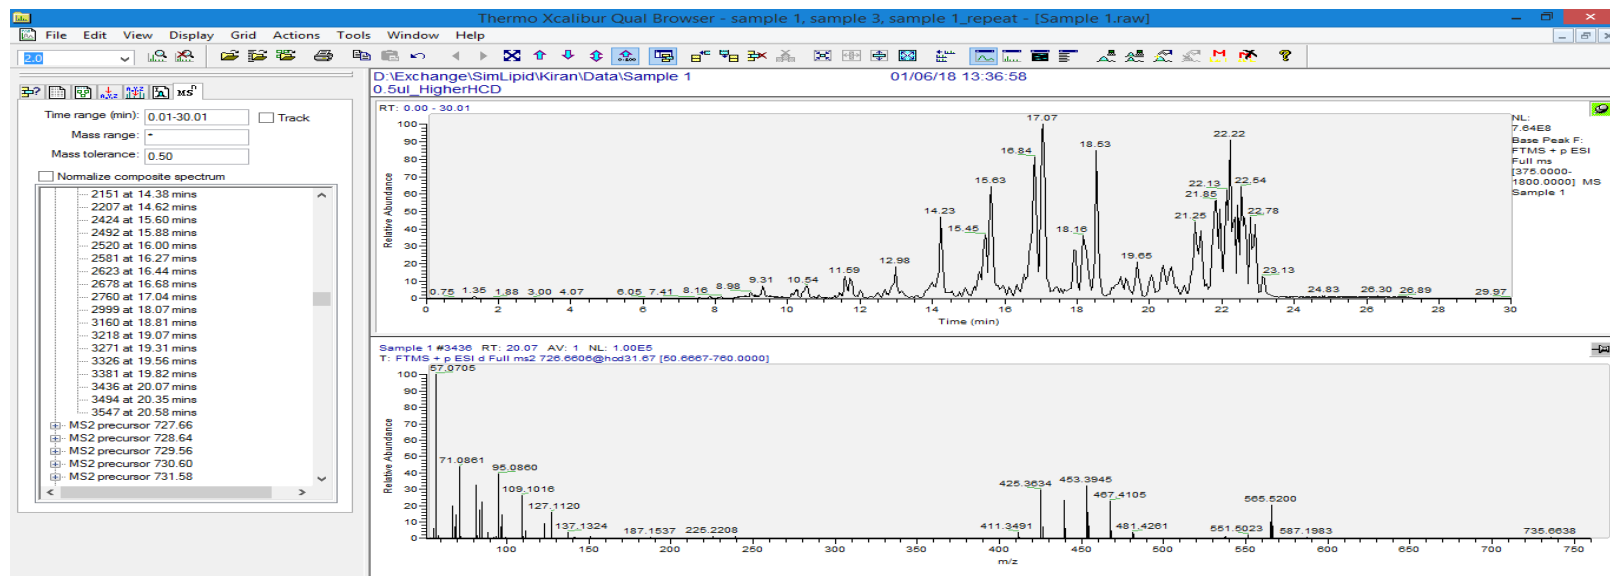

Figure S8 (9): An example MS/MS spectrum of TG 10:0\_12:0\_14:0 that contains 10:0 as one of the fatty acids.

|                                    |                                                                                                                                                                                                                                                             |
|------------------------------------|-------------------------------------------------------------------------------------------------------------------------------------------------------------------------------------------------------------------------------------------------------------|
| File Name                          | Sample 1                                                                                                                                                                                                                                                    |
| Scan #                             | 2609                                                                                                                                                                                                                                                        |
| Retention Time                     | 16.3923                                                                                                                                                                                                                                                     |
| m/z                                | 656.5826                                                                                                                                                                                                                                                    |
| Chemical Composition               | [C39H74O6+NH4] 1+                                                                                                                                                                                                                                           |
| LIPIDMAPS Abbreviation/Common Name | TG(10:0/12:0/14:0)                                                                                                                                                                                                                                          |
| Main Class                         | TAG                                                                                                                                                                                                                                                         |
| Sub Class                          | Triacylglycerols                                                                                                                                                                                                                                            |
| Lipid ID                           | TG(10:0/12:0/14:0)                                                                                                                                                                                                                                          |
| Theoretical m/z                    | 656.5824                                                                                                                                                                                                                                                    |
| Delta Mass                         | 0.4238 ppm                                                                                                                                                                                                                                                  |
| Group                              | TG                                                                                                                                                                                                                                                          |
| LSI ID                             | TG 10:0_12:0_14:0                                                                                                                                                                                                                                           |
| Short Name                         | TG 36:0                                                                                                                                                                                                                                                     |
| Graded ID                          | TG 10:0_12:0_14:0                                                                                                                                                                                                                                           |
| Matched Ions                       | 9:0 C=O+ <sub>155.1431(168913.8906)</sub> , 11:0 C=O+ <sub>183.1742(21730.877)</sub> , 13:0 C=O+ <sub>211.206(25832.4473)</sub> , M-14:0 <sub>411.3474(312534.125)</sub> , M-12:0 <sub>439.3783(111215.4609)</sub> , M-10:0 <sub>467.4102(427428.625)</sub> |

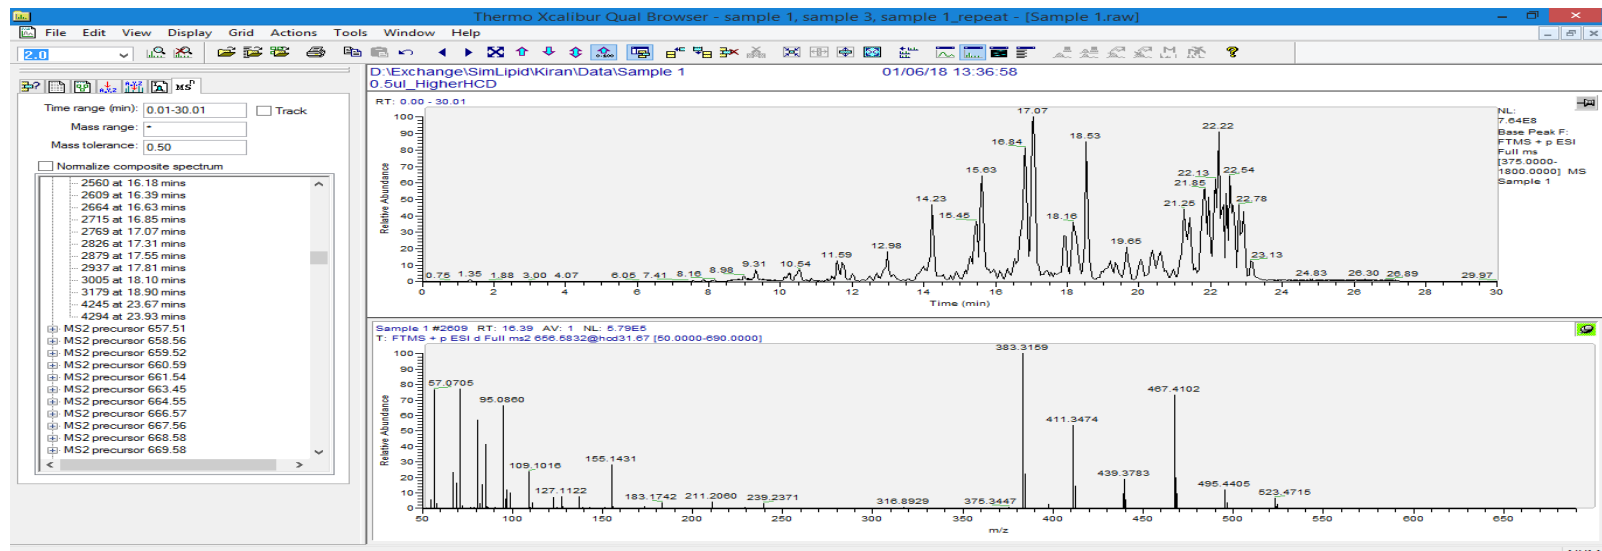



Figure S8 (10): An example MS/MS spectrum of TG 4:0\_10:1\_14:0 that contains 10:1 as one of the fatty acids.

|                                    |                                                                                                                                                                                        |
|------------------------------------|----------------------------------------------------------------------------------------------------------------------------------------------------------------------------------------|
| File Name                          | Sample 4                                                                                                                                                                               |
| Scan #                             | 1445                                                                                                                                                                                   |
| Retention Time                     | 10.5883                                                                                                                                                                                |
| m/z                                | 542.442                                                                                                                                                                                |
| Chemical Composition               | [C31H56O6+NH4] 1+                                                                                                                                                                      |
| LIPIDMAPS Abbreviation/Common Name | TG(4:0/10:1(6Z)/14:0)                                                                                                                                                                  |
| Main Class                         | TAG                                                                                                                                                                                    |
| Sub Class                          | Triacylglycerols                                                                                                                                                                       |
| Lipid ID                           | TG(4:0/10:1(6Z)/14:0)                                                                                                                                                                  |
| Theoretical m/z                    | 542.4415                                                                                                                                                                               |
| Delta Mass                         | 0.9289 ppm                                                                                                                                                                             |
| Group                              | TG                                                                                                                                                                                     |
| LSI ID                             | TG 4:0_10:1_14:0                                                                                                                                                                       |
| Short Name                         | TG 28:1                                                                                                                                                                                |
| Graded ID                          | TG 4:0_10:1_14:0                                                                                                                                                                       |
| Matched Ions                       | 3:0 C=O+ _71.0497(67722.3516), 9:1 C=O+ _153.1273(2776.2185), 13:0 C=O+ _211.2059(8476.6777), M-14:0 _297.2062(150994.6094), M-10:1 _355.2845(63909.4688), M-4:0 _437.3628(52527.8789) |

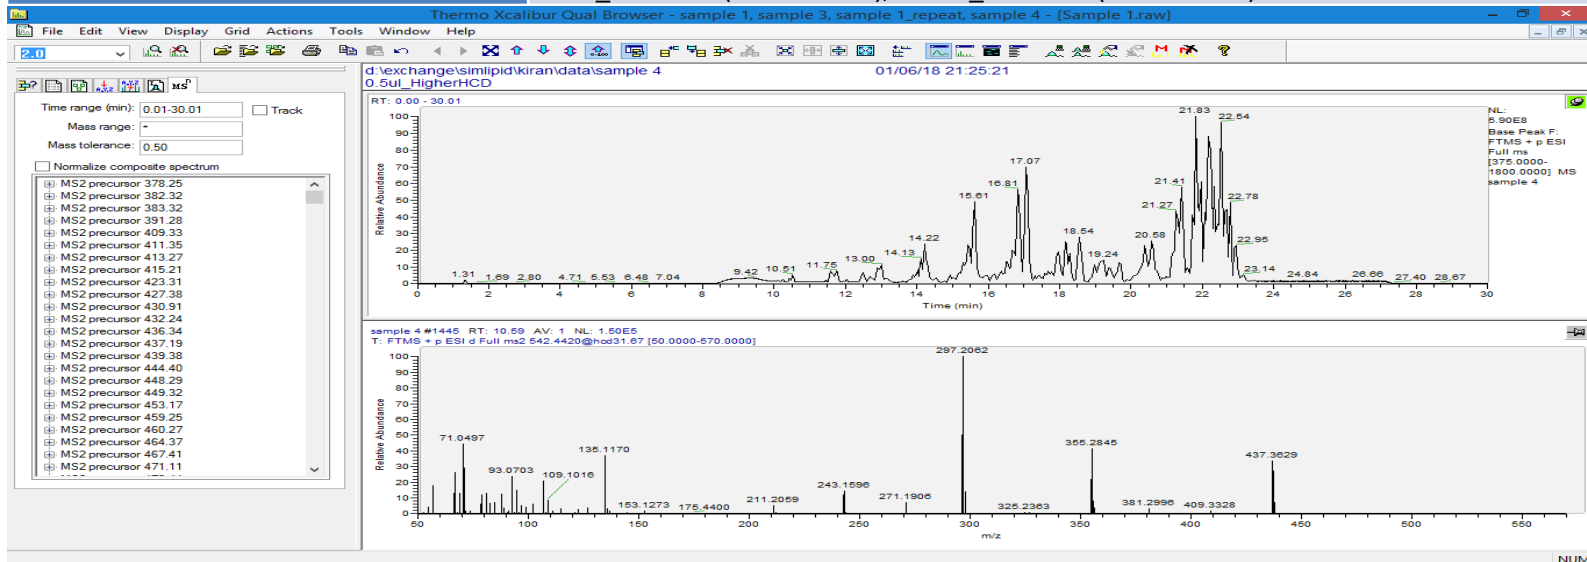

Figure S8 (11): An example MS/MS spectrum of TG 11:0\_14:0\_16:0 that contains 11:0 as one of the fatty acids.

|                                       |                                                                                                                                                      |
|---------------------------------------|------------------------------------------------------------------------------------------------------------------------------------------------------|
| File Name                             | Sample 4_repeat                                                                                                                                      |
| Scan #                                | 3402                                                                                                                                                 |
| Retention Time                        | 19.9151                                                                                                                                              |
| m/z                                   | 726.6612                                                                                                                                             |
| Chemical Composition                  | [C44H84O6+NH4] 1+                                                                                                                                    |
| LIPIDMAPS<br>Abbreviation/Common Name | TG(11:0/14:0/16:0)                                                                                                                                   |
| Main Class                            | TAG                                                                                                                                                  |
| Sub Class                             | Triacylglycerols                                                                                                                                     |
| Lipid ID                              | TG(11:0/14:0/16:0)                                                                                                                                   |
| Theoretical m/z                       | 726.6606                                                                                                                                             |
| Delta Mass                            | 0.7983 ppm                                                                                                                                           |
| Group                                 | TG                                                                                                                                                   |
| LSI ID                                | TG 11:0_14:0_16:0                                                                                                                                    |
| Short Name                            | TG 41:0                                                                                                                                              |
| Graded ID                             | TG 11:0_14:0_16:0                                                                                                                                    |
| Matched Ions                          | 13:0 C=O+ _211.206(3603.4819), 15:0 C=O+ _239.2368(3294.7551), M-16:0_453.3942(86159.9375), M-14:0_481.4254(33482.5508), M-11:0_523.4719(10786.8057) |

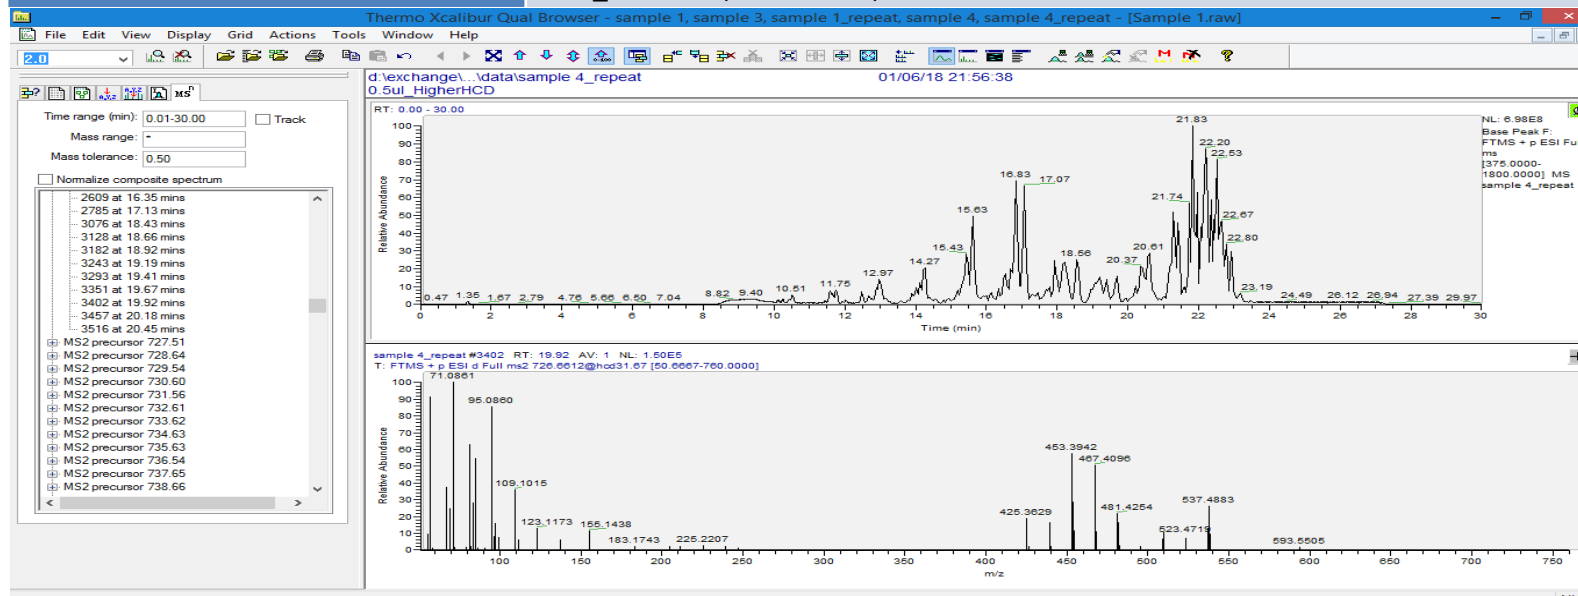

Figure S8 (12): An example MS/MS spectrum of TG 6:0\_12:1\_14:1 that contains the fatty acids 12:1 and 14:1.

|                                    |                                                                                                                                                                                                            |
|------------------------------------|------------------------------------------------------------------------------------------------------------------------------------------------------------------------------------------------------------|
| File Name                          | Sample 4_repeat                                                                                                                                                                                            |
| Scan #                             | 1626                                                                                                                                                                                                       |
| Retention Time                     | 11.6683                                                                                                                                                                                                    |
| m/z                                | 596.4892                                                                                                                                                                                                   |
| Chemical Composition               | [C35H62O6+NH4] 1+                                                                                                                                                                                          |
| LIPIDMAPS Abbreviation/Common Name | TG(6:0/12:1(6Z)/14:1(9Z))                                                                                                                                                                                  |
| Main Class                         | TAG                                                                                                                                                                                                        |
| Sub Class                          | Triacylglycerols                                                                                                                                                                                           |
| Lipid ID                           | TG(6:0/12:1(6Z)/14:1(9Z))                                                                                                                                                                                  |
| Theoretical m/z                    | 596.4885                                                                                                                                                                                                   |
| Delta Mass                         | 1.2302 ppm                                                                                                                                                                                                 |
| Group                              | TG                                                                                                                                                                                                         |
| LSI ID                             | TG 6:0_12:1_14:1                                                                                                                                                                                           |
| Short Name                         | TG 32:2                                                                                                                                                                                                    |
| Graded ID                          | TG 6:0_12:1_14:1                                                                                                                                                                                           |
| Matched Ions                       | 5:0 C=O+ <sub>99.081(17267.3457)</sub> , 13:1 C=O+ <sub>209.1903(6066.4502)</sub> , M-14:1 <sub>353.2692(57611.8242)</sub> , M-12:1 <sub>381.3004(2242.2351)</sub> , M-6:0 <sub>463.3791(12493.7334)</sub> |

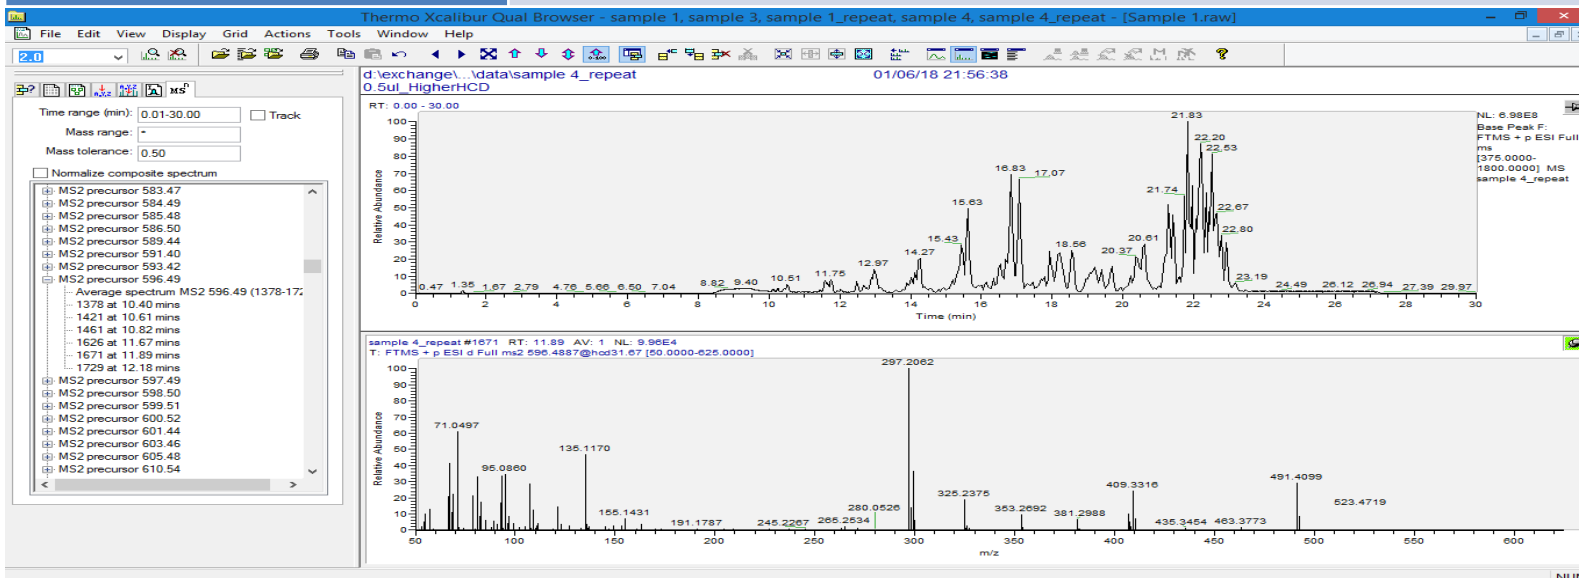

Figure S8 (13): An example MS/MS spectrum of TG 8:0\_10:0\_13:0 that contains 13:0 as one of the fatty acids.

|                                       |                                                                                                                                                                                                                    |
|---------------------------------------|--------------------------------------------------------------------------------------------------------------------------------------------------------------------------------------------------------------------|
| File Name                             | Sample 1                                                                                                                                                                                                           |
| Scan #                                | 1937                                                                                                                                                                                                               |
| Retention Time                        | 13.3493                                                                                                                                                                                                            |
| m/z                                   | 586.5044                                                                                                                                                                                                           |
| Chemical Composition                  | [C34H64O6+NH4] 1+                                                                                                                                                                                                  |
| LIPIDMAPS<br>Abbreviation/Common Name | TG(8:0/10:0/13:0)                                                                                                                                                                                                  |
| Main Class                            | TAG                                                                                                                                                                                                                |
| Sub Class                             | Triacylglycerols                                                                                                                                                                                                   |
| Lipid ID                              | TG(8:0/10:0/13:0)                                                                                                                                                                                                  |
| Theoretical m/z                       | 586.5041                                                                                                                                                                                                           |
| Delta Mass                            | 0.48 ppm                                                                                                                                                                                                           |
| Group                                 | TG                                                                                                                                                                                                                 |
| LSI ID                                | TG 8:0_10:0_13:0                                                                                                                                                                                                   |
| Short Name                            | TG 31:0                                                                                                                                                                                                            |
| Graded ID                             | TG 8:0_10:0_13:0                                                                                                                                                                                                   |
| Matched Ions                          | 7:0 C=O+ <sub>127.1121(3522.7087)</sub> , 9:0 C=O+ <sub>155.1433(23203.0977)</sub> , M-<br>13:0 <sub>355.2853(8719.9727)</sub> , M-10:0 <sub>397.3314(50397.6055)</sub> , M-<br>8:0 <sub>425.3625(4267.0239)</sub> |

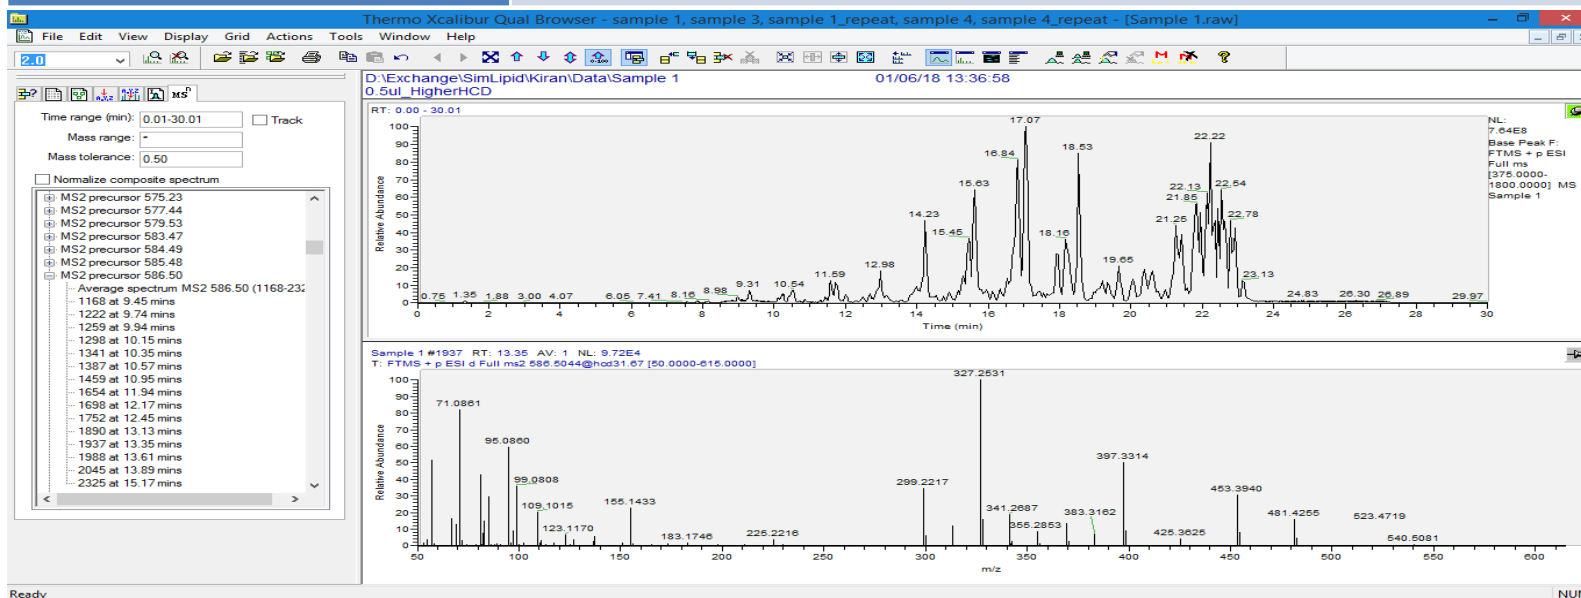

Figure S8 (14): An example MS/MS spectrum of TG 4:0\_15:1\_16:0 that contains 15:1 as one of the fatty acids.

|                                       |                                                                                                                                                                                                  |
|---------------------------------------|--------------------------------------------------------------------------------------------------------------------------------------------------------------------------------------------------|
| File Name                             | Sample 1_repeat                                                                                                                                                                                  |
| Scan #                                | 2386                                                                                                                                                                                             |
| Retention Time                        | 15.4225                                                                                                                                                                                          |
| m/z                                   | 640.5518                                                                                                                                                                                         |
| Chemical Composition                  | [C38H70O6+NH4] 1+                                                                                                                                                                                |
| LIPIDMAPS<br>Abbreviation/Common Name | TG(4:0/15:1(9Z)/16:0)                                                                                                                                                                            |
| Main Class                            | TAG                                                                                                                                                                                              |
| Sub Class                             | Triacylglycerols                                                                                                                                                                                 |
| Lipid ID                              | TG(4:0/15:1(9Z)/16:0)                                                                                                                                                                            |
| Theoretical m/z                       | 640.5511                                                                                                                                                                                         |
| Delta Mass                            | 1.0844 ppm                                                                                                                                                                                       |
| Group                                 | TG                                                                                                                                                                                               |
| LSI ID                                | TG 4:0_15:1_16:0                                                                                                                                                                                 |
| Short<br>Name                         | TG 35:1                                                                                                                                                                                          |
| Graded ID                             | TG 4:0_15:1_16:0                                                                                                                                                                                 |
| Matched Ions                          | 4:0 C=O+ _85.0653(1316.6154), 14:1 C=O+ _223.2063(2310.807617), 15:0 C=O+ _239.2373(1806.424683), M-15:1 _383.318345(37593.15625),M-4:0 _535.470424(2333.004883),M-16:0 _367.282197(9641.953125) |

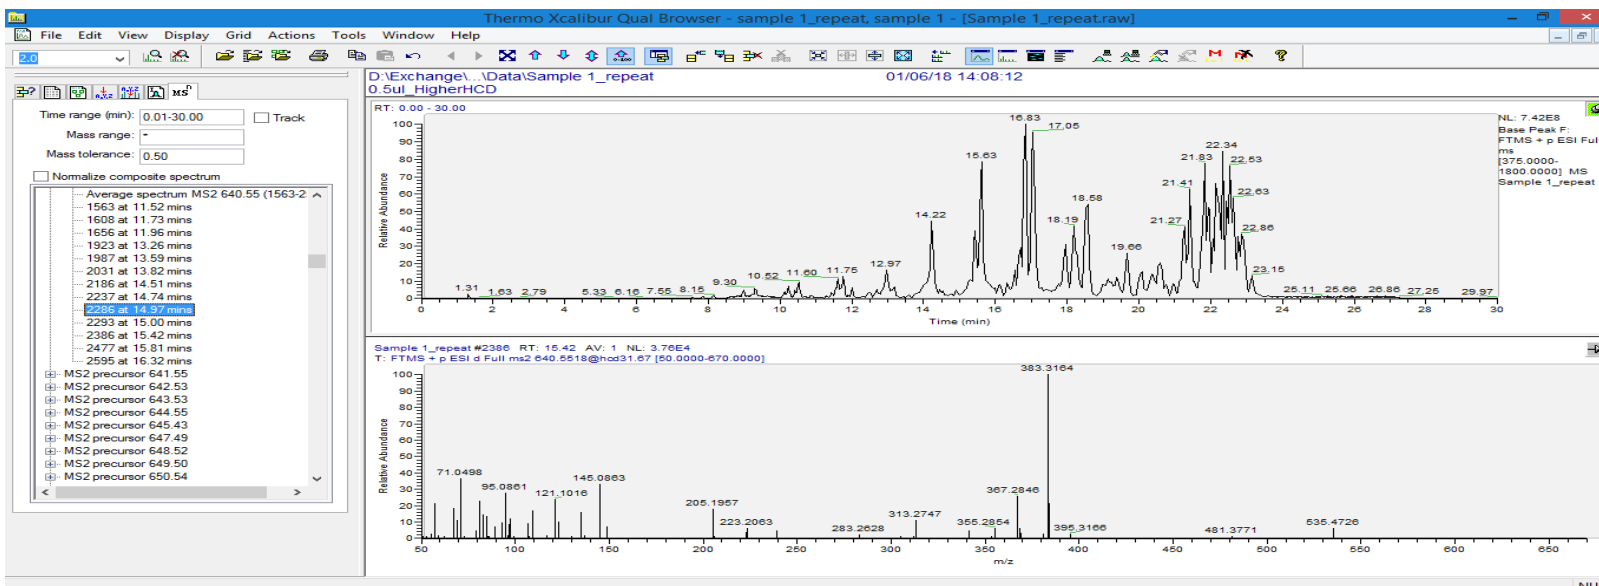

Figure S8 (15): An example MS/MS spectrum of TG 6:0\_10:0\_16:2 that contains 16:2 as one of the fatty acids.

|                                    |                                                                                                                                                                                                            |
|------------------------------------|------------------------------------------------------------------------------------------------------------------------------------------------------------------------------------------------------------|
| File Name                          | Sample 1_repeat                                                                                                                                                                                            |
| Scan #                             | 1634                                                                                                                                                                                                       |
| Retention Time                     | 11.8414                                                                                                                                                                                                    |
| m/z                                | 596.4887                                                                                                                                                                                                   |
| Chemical Composition               | [C35H62O6+NH4] 1+                                                                                                                                                                                          |
| LIPIDMAPS Abbreviation/Common Name | TG(6:0/10:0/16:2(9Z,12Z))                                                                                                                                                                                  |
| Main Class                         | TAG                                                                                                                                                                                                        |
| Sub Class                          | Triacylglycerols                                                                                                                                                                                           |
| Lipid ID                           | TG(6:0/10:0/16:2(9Z,12Z))                                                                                                                                                                                  |
| Theoretical m/z                    | 596.4885                                                                                                                                                                                                   |
| Delta Mass                         | 0.4117 ppm                                                                                                                                                                                                 |
| Group                              | TG                                                                                                                                                                                                         |
| LSI ID                             | TG 6:0_10:0_16:2                                                                                                                                                                                           |
| Short Name                         | TG 32:2                                                                                                                                                                                                    |
| Graded ID                          | TG 6:0_10:0_16:2                                                                                                                                                                                           |
| Matched Ions                       | 5:0 C=O+ <sub>99.0808(12754.6553)</sub> , 9:0 C=O+ <sub>155.1433(29190.7754)</sub> , M-16:2 <sub>327.2532(2940.1582)</sub> , M-10:0 <sub>407.3159(37164.3672)</sub> , M-6:0 <sub>463.3799(7078.8677)</sub> |

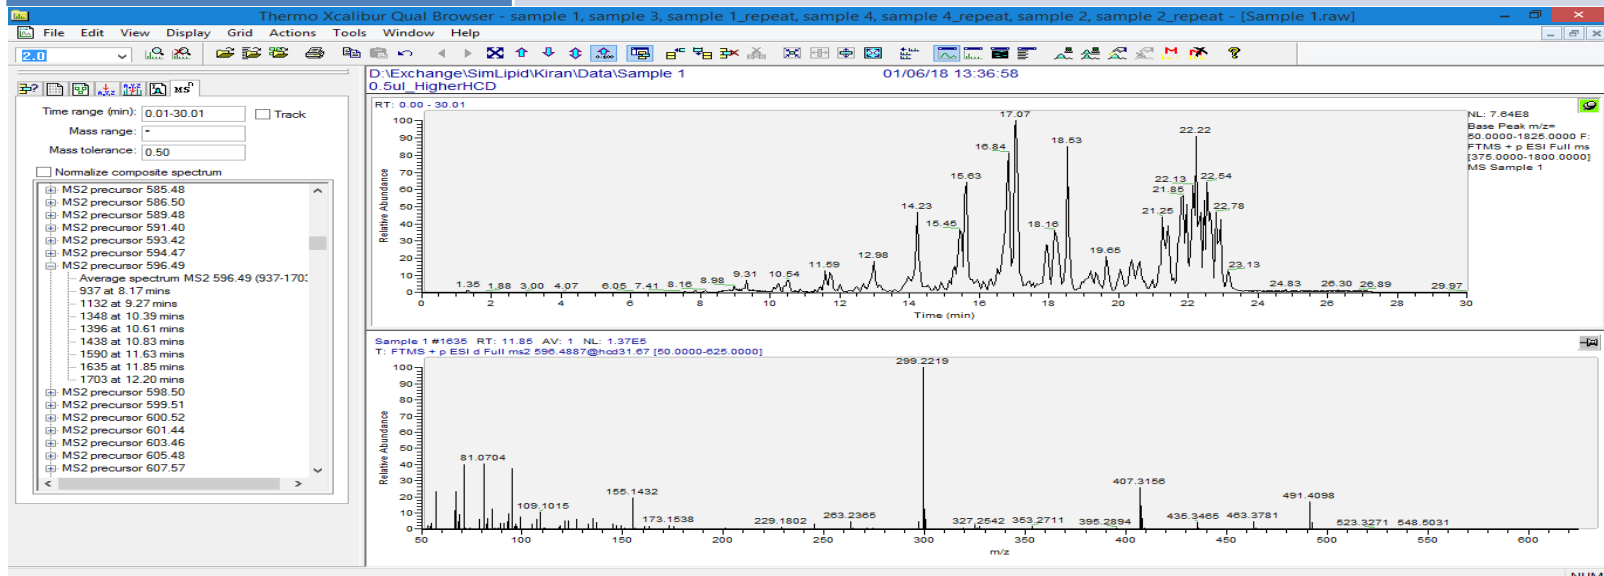

Figure S8 (16): An example MS/MS spectrum of TG 4:0\_16:0\_17:0 that contains 17:0 as one of the fatty acids.

|                          |                                                                                                                                                                                                                                                              |
|--------------------------|--------------------------------------------------------------------------------------------------------------------------------------------------------------------------------------------------------------------------------------------------------------|
| File Name                | Sample_1_repeat                                                                                                                                                                                                                                              |
| Scan #                   | 2942                                                                                                                                                                                                                                                         |
| Retention Time           | 17.812                                                                                                                                                                                                                                                       |
| m/z                      | 670.5983                                                                                                                                                                                                                                                     |
| Chemical Composition     | [C40H76O6+NH4] <sup>1+</sup>                                                                                                                                                                                                                                 |
| LIPIDMAPS                | TG(4:0/16:0/17:0)                                                                                                                                                                                                                                            |
| Abbreviation/Common Name |                                                                                                                                                                                                                                                              |
| Main Class               | TAG                                                                                                                                                                                                                                                          |
| Sub Class                | Triacylglycerols                                                                                                                                                                                                                                             |
| Lipid ID                 | TG(4:0/16:0/17:0)                                                                                                                                                                                                                                            |
| Theoretical m/z          | 670.598                                                                                                                                                                                                                                                      |
| Delta Mass               | 0.4685 ppm                                                                                                                                                                                                                                                   |
| Group                    | TG                                                                                                                                                                                                                                                           |
| LSI ID                   | TG 4:0_16:0_17:0                                                                                                                                                                                                                                             |
| Short Name               | TG 37:0                                                                                                                                                                                                                                                      |
| Graded ID                | TG 4:0_16:0_17:0                                                                                                                                                                                                                                             |
| Matched Ions             | 3:0 C=O+ <sub>71.0498(826046.3125)</sub> , 15:0 C=O+ <sub>239.2373(69039.6484)</sub> , 16:0 C=O+ <sub>253.2529(43307.3164)</sub> , M-17:0 <sub>383.3158(893575.8125)</sub> , M-16:0 <sub>397.3315(834546.625)</sub> , M-4:0 <sub>565.5202(387019.2812)</sub> |

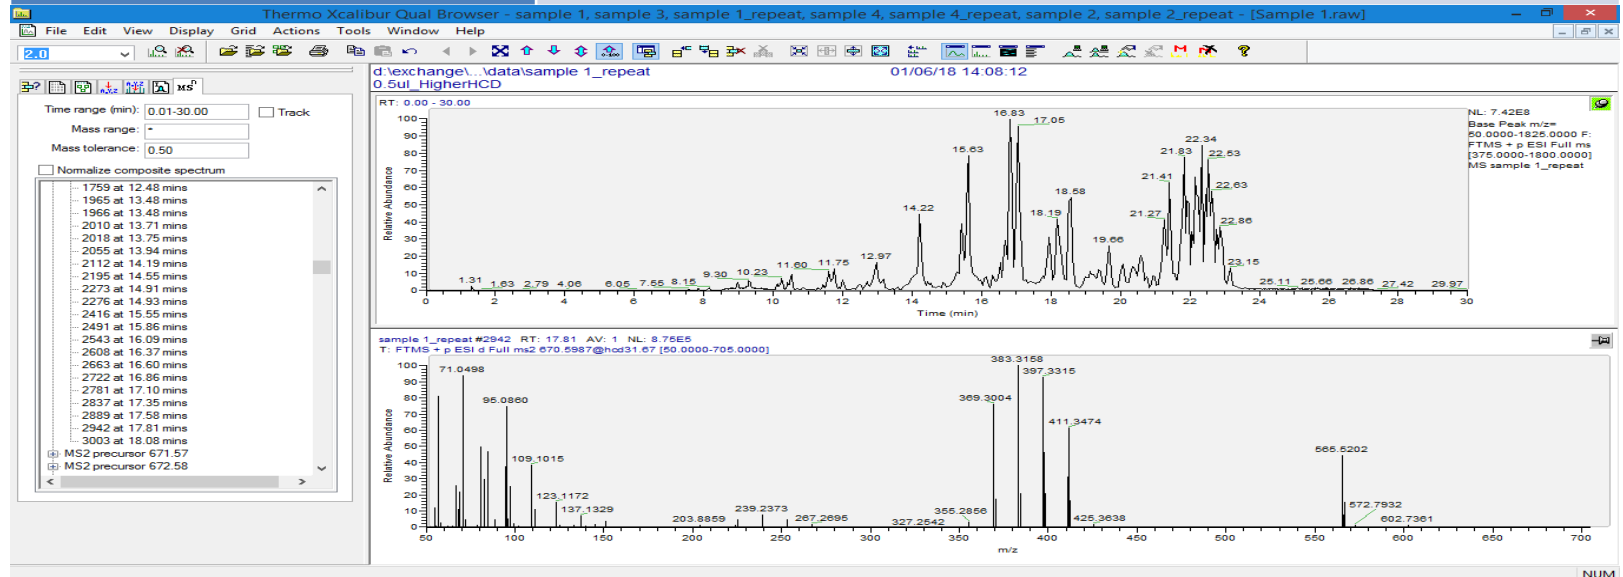

Figure S8 (17): An example MS/MS spectrum of TG 4:0\_14:0\_17:1 that contains 17:1 as one of the fatty acids.

|                                       |                                                                                                                                                                                      |
|---------------------------------------|--------------------------------------------------------------------------------------------------------------------------------------------------------------------------------------|
| File Name                             | Sample 1_repeat                                                                                                                                                                      |
| Scan #                                | 2237                                                                                                                                                                                 |
| Retention Time                        | 14.7445                                                                                                                                                                              |
| m/z                                   | 640.5515                                                                                                                                                                             |
| Chemical Composition                  | [C38H70O6+NH4] 1+                                                                                                                                                                    |
| LIPIDMAPS<br>Abbreviation/Common Name | TG(4:0/14:0/17:1(9Z))                                                                                                                                                                |
| Main Class                            | TAG                                                                                                                                                                                  |
| Sub Class                             | Triacylglycerols                                                                                                                                                                     |
| Lipid ID                              | TG(4:0/14:0/17:1(9Z))                                                                                                                                                                |
| Theoretical m/z                       | 640.5511                                                                                                                                                                             |
| Delta Mass                            | 0.6079 ppm                                                                                                                                                                           |
| Group                                 | TG                                                                                                                                                                                   |
| LSI ID                                | TG 4:0_14:0_17:1                                                                                                                                                                     |
| Short Name                            | TG 35:1                                                                                                                                                                              |
| Graded ID                             | TG 4:0_14:0_17:1                                                                                                                                                                     |
| Matched Ions                          | 3:0 C=O+ _71.0497(102612.7031), 13:0 C=O+ _211.2061(6576.2056), 16:1 C=O+ _251.2368(7618.7022), M-17:1_355.2845(86598.2891), M-14:0_395.3158(63127.3945), M-4:0_535.4722(60143.0078) |

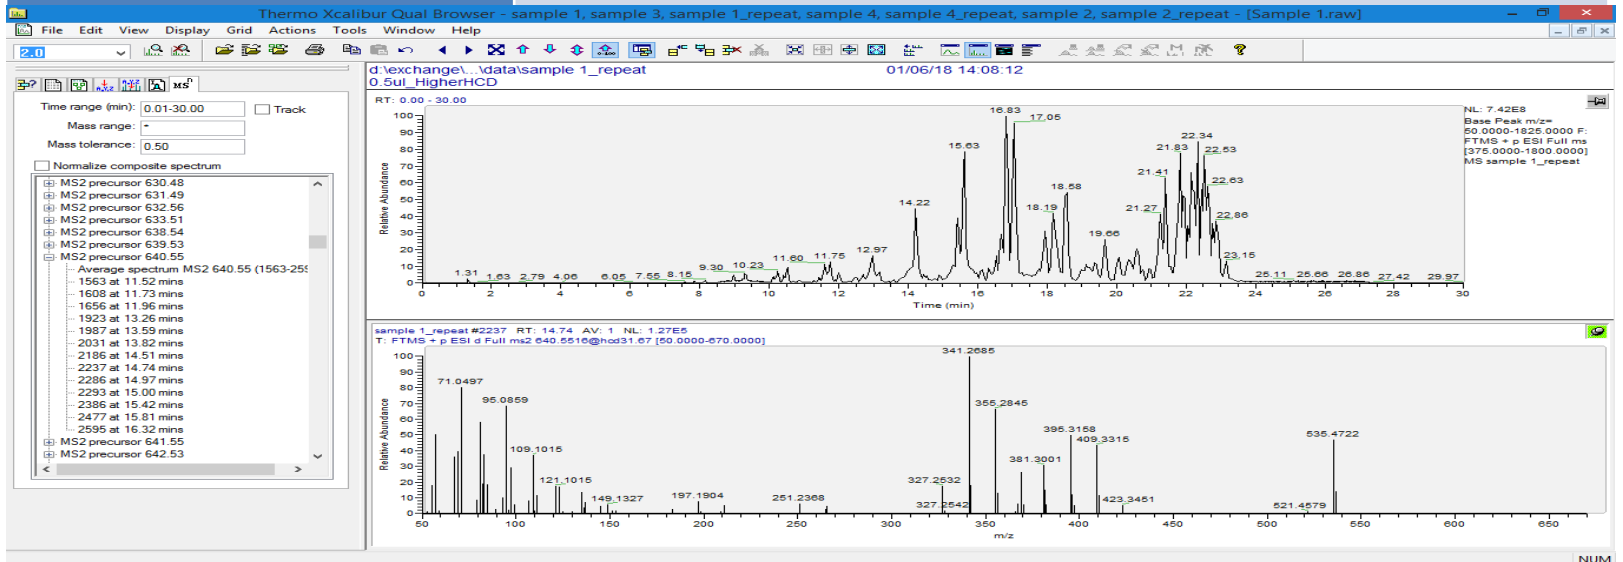



Figure S8 (18): An example MS/MS spectrum of TG 4:0\_15:0\_18:2 that contains 18:2 as one of the fatty acids.

|                                       |                                                                                                                                                                                     |
|---------------------------------------|-------------------------------------------------------------------------------------------------------------------------------------------------------------------------------------|
| File Name                             | Sample 1_repeat                                                                                                                                                                     |
| Scan #                                | 2318                                                                                                                                                                                |
| Retention Time                        | 15.1265                                                                                                                                                                             |
| m/z                                   | 666.5671                                                                                                                                                                            |
| Chemical Composition                  | [C40H72O6+NH4] 1+                                                                                                                                                                   |
| LIPIDMAPS<br>Abbreviation/Common Name | TG(4:0/15:0/18:2(9Z,11Z))                                                                                                                                                           |
| Main Class                            | TAG                                                                                                                                                                                 |
| Sub Class                             | Triacylglycerols                                                                                                                                                                    |
| Lipid ID                              | TG(4:0/15:0/18:2(9Z,11Z))                                                                                                                                                           |
| Theoretical m/z                       | 666.5667                                                                                                                                                                            |
| Delta Mass                            | 0.5466 ppm                                                                                                                                                                          |
| Group                                 | TG                                                                                                                                                                                  |
| LSI ID                                | TG 4:0_15:0_18:2                                                                                                                                                                    |
| Short Name                            | TG 37:2                                                                                                                                                                             |
| Graded ID                             | TG 4:0_15:0_18:2                                                                                                                                                                    |
| Matched Ions                          | 3:0 C=O+ _71.0497(33464.0977), 14:0 C=O+ _225.2209(3060.1704), 17:2 C=O+ _263.2379(7690.2871), M-18:2_369.3002(59638.3008), M-15:0_407.3155(37364.0117), M-4:0_561.4876(11652.0967) |

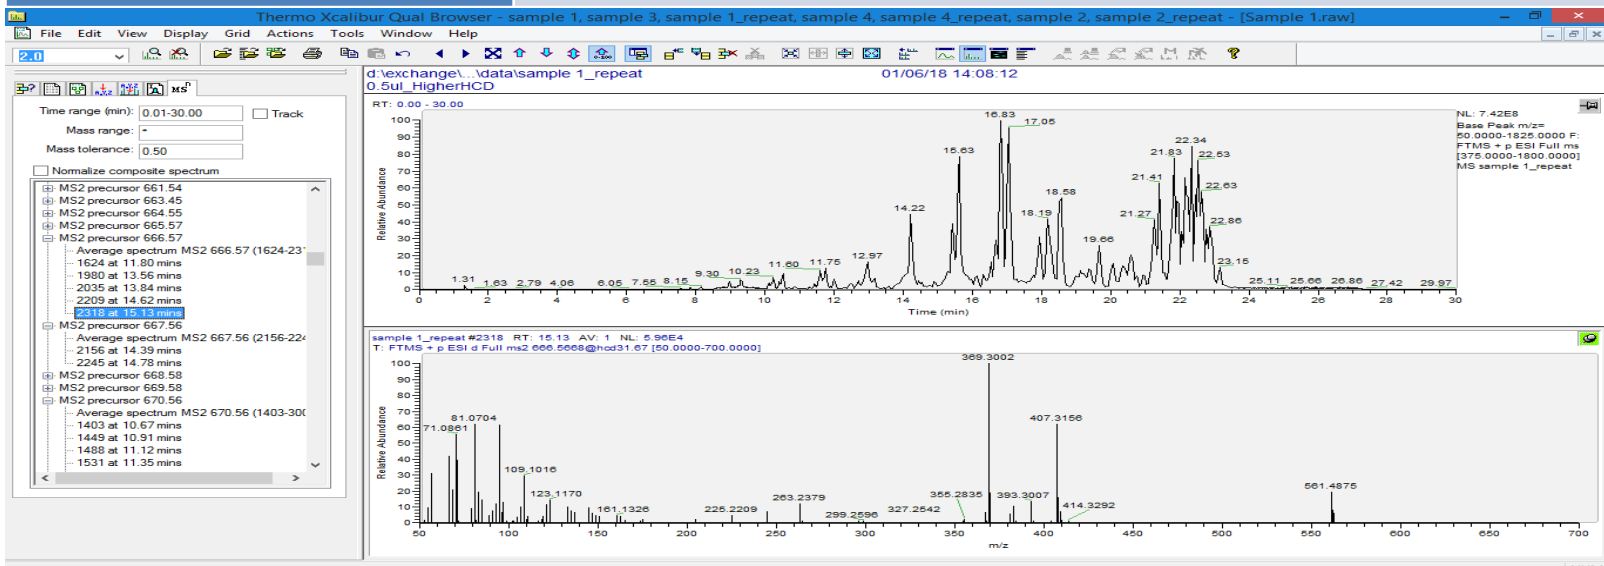

Figure S8 (19): An example MS/MS spectrum of TG 4:0\_16:0\_18:3 that contains 18:3 as one of the fatty acids.

|                                    |                                                                                                                                                                                      |
|------------------------------------|--------------------------------------------------------------------------------------------------------------------------------------------------------------------------------------|
| File Name                          | Sample 1                                                                                                                                                                             |
| Scan #                             | 2226                                                                                                                                                                                 |
| Retention Time                     | 14.7052                                                                                                                                                                              |
| m/z                                | 678.567                                                                                                                                                                              |
| Chemical Composition               | [C41H72O6+NH4] 1+                                                                                                                                                                    |
| LIPIDMAPS Abbreviation/Common Name | TG(4:0/16:0/18:3(6Z,9Z,12Z))                                                                                                                                                         |
| Main Class                         | TAG                                                                                                                                                                                  |
| Sub Class                          | Triacylglycerols                                                                                                                                                                     |
| Lipid ID                           | TG(4:0/16:0/18:3(6Z,9Z,12Z))                                                                                                                                                         |
| Theoretical m/z                    | 678.5667                                                                                                                                                                             |
| Delta Mass                         | 0.447 ppm                                                                                                                                                                            |
| Group                              | TG                                                                                                                                                                                   |
| LSI ID                             | TG 4:0_16:0_18:3                                                                                                                                                                     |
| Short Name                         | TG 38:3                                                                                                                                                                              |
| Graded ID                          | TG 4:0_16:0_18:3                                                                                                                                                                     |
| Matched Ions                       | 3:0 C=O+ _71.0497(91287.6016), 15:0 C=O+ _239.2369(8421.4502), 17:3 C=O+ _261.2213(41331.0664), M-18:3 _383.316(102249.8906), M-16:0 _405.3(66590.4922), M-4:0 _573.4893(12655.7861) |

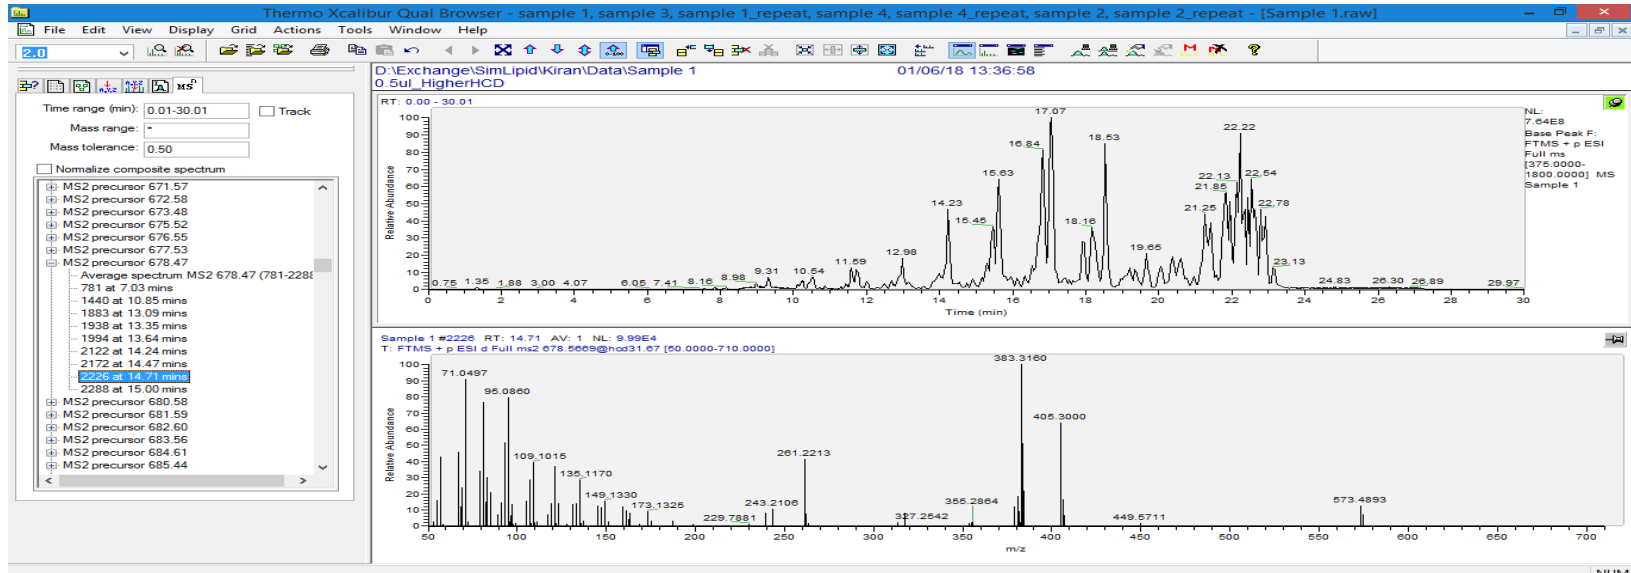

Figure S8 (20): An example MS/MS spectrum of TG 4:0\_16:0\_19:0 that contains 19:0 as one of the fatty acids.

|                                    |                                                                                                                                                                     |
|------------------------------------|---------------------------------------------------------------------------------------------------------------------------------------------------------------------|
| File Name                          | Sample 1                                                                                                                                                            |
| Scan #                             | 3272                                                                                                                                                                |
| Retention Time                     | 19.3131                                                                                                                                                             |
| m/z                                | 698.6301                                                                                                                                                            |
| Chemical Composition               | [C42H80O6+NH4] 1+                                                                                                                                                   |
| LIPIDMAPS Abbreviation/Common Name | TG(4:0/16:0/19:0)                                                                                                                                                   |
| Main Class                         | TAG                                                                                                                                                                 |
| Sub Class                          | Triacylglycerols                                                                                                                                                    |
| Lipid ID                           | TG(4:0/16:0/19:0)                                                                                                                                                   |
| Theoretical m/z                    | 698.6293                                                                                                                                                            |
| Delta Mass                         | 1.0769 ppm                                                                                                                                                          |
| Group                              | TG                                                                                                                                                                  |
| LSI ID                             | TG 4:0_16:0_19:0                                                                                                                                                    |
| Short Name                         | TG 39:0                                                                                                                                                             |
| Graded ID                          | TG 4:0_16:0_19:0                                                                                                                                                    |
| Matched Ions                       | 3:0 C=O+ <sub>71.0498(190325.5938)</sub> , M-19:0 <sub>383.3156(108369.9609)</sub> , M-16:0 <sub>425.3632(63992.7344)</sub> , M-4:0 <sub>593.5515(71912.3594)</sub> |

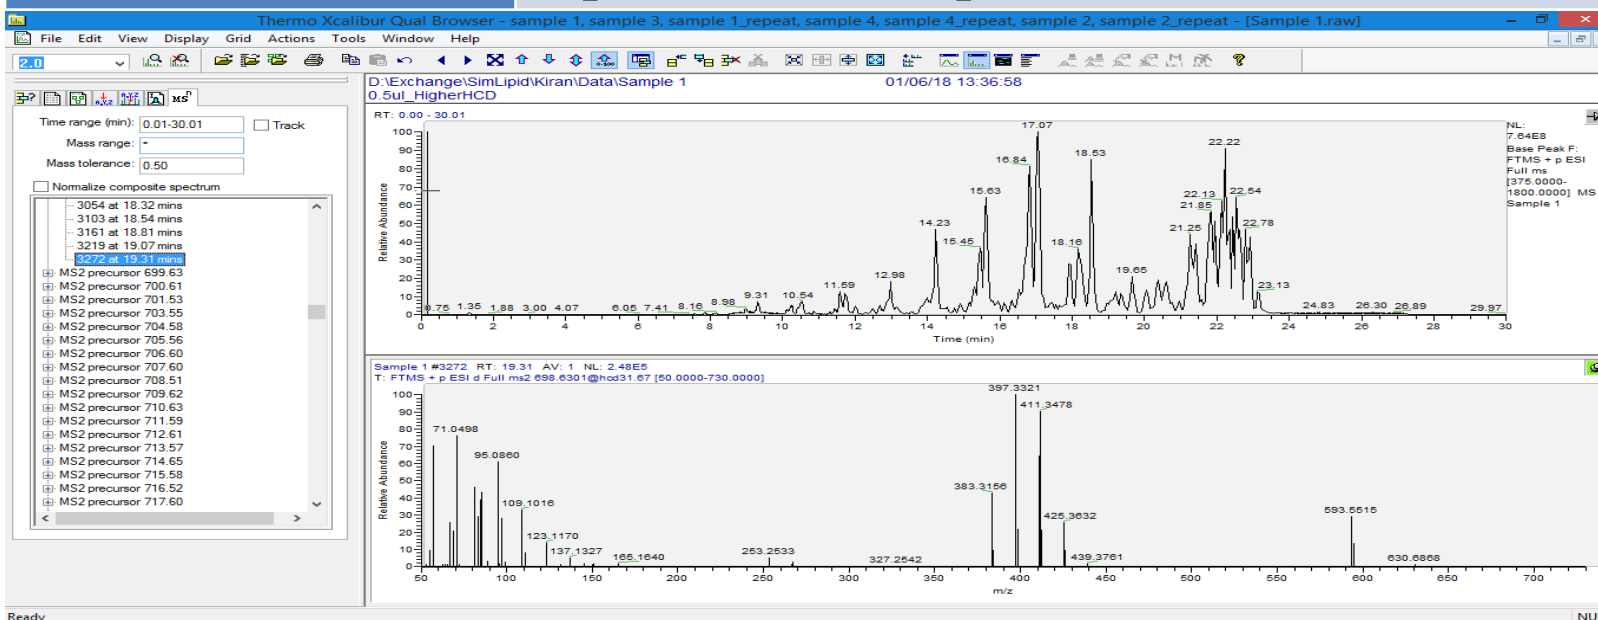

Figure S8 (21): An example MS/MS spectrum of TG 4:0\_18:0\_19:1 that contains 19:1 as one of the fatty acids.

|                                    |                                                                                                                                |
|------------------------------------|--------------------------------------------------------------------------------------------------------------------------------|
| File Name                          | Sample 1 repeat                                                                                                                |
| Scan #                             | 3193                                                                                                                           |
| Retention Time                     | 18.9415                                                                                                                        |
| m/z                                | 724.6453                                                                                                                       |
| Chemical Composition               | [C44H82O6+NH4] 1+                                                                                                              |
| LIPIDMAPS Abbreviation/Common Name | TG(4:0/18:0/19:1(9Z))                                                                                                          |
| Main Class                         | TAG                                                                                                                            |
| Sub Class                          | Triacylglycerols                                                                                                               |
| Lipid ID                           | TG(4:0/18:0/19:1(9Z))                                                                                                          |
| Theoretical m/z                    | 724.645                                                                                                                        |
| Delta Mass                         | 0.4983 ppm                                                                                                                     |
| Group                              | TG                                                                                                                             |
| LSI ID                             | TG 4:0_18:0_19:1                                                                                                               |
| Short Name                         | TG 41:1                                                                                                                        |
| Graded ID                          | TG 4:0_18:0_19:1                                                                                                               |
| Matched Ions                       | 3:0 C=O+ <sub>71.0497(44013.2617)</sub> , M-19:1_411.3472(40900.5547), M-18:0_423.3464(18980.3867), M-4:0_619.5675(12176.5889) |

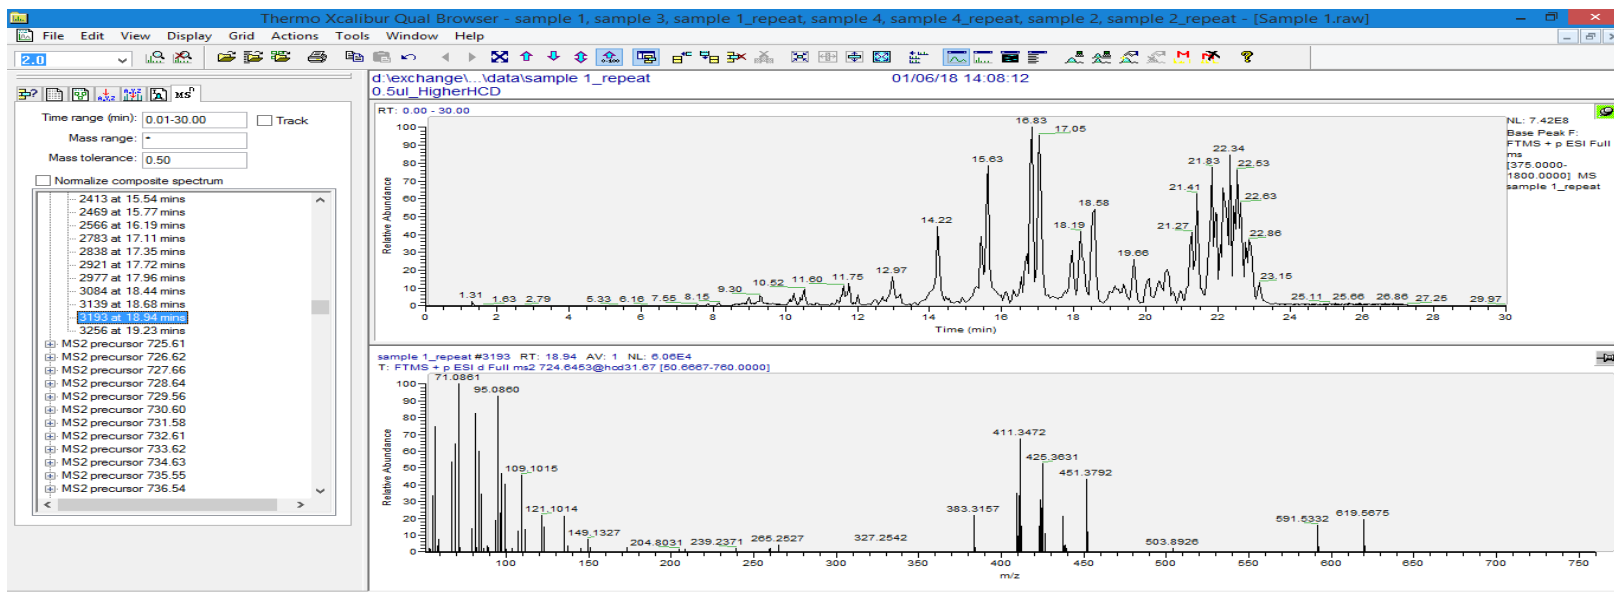

Figure S8 (22): An example MS/MS spectrum of TG 4:0\_16:0\_20:0 that contains 20:0 as one of the fatty acids.

|                                    |                                                                                                                                                    |
|------------------------------------|----------------------------------------------------------------------------------------------------------------------------------------------------|
| File Name                          | Sample 2_repeat                                                                                                                                    |
| Scan #                             | 3368                                                                                                                                               |
| Retention Time                     | 19.9946                                                                                                                                            |
| m/z                                | 712.6451                                                                                                                                           |
| Chemical Composition               | [C43H82O6+NH4] 1+                                                                                                                                  |
| LIPIDMAPS Abbreviation/Common Name | TG(4:0/16:0/20:0)                                                                                                                                  |
| Main Class                         | TAG                                                                                                                                                |
| Sub Class                          | Triacylglycerols                                                                                                                                   |
| Lipid ID                           | TG(4:0/16:0/20:0)                                                                                                                                  |
| Theoretical m/z                    | 712.645                                                                                                                                            |
| Delta Mass                         | 0.1641 ppm                                                                                                                                         |
| Group                              | TG                                                                                                                                                 |
| LSI ID                             | TG 4:0_16:0_20:0                                                                                                                                   |
| Short Name                         | TG 40:0                                                                                                                                            |
| Graded ID                          | TG 4:0_16:0_20:0                                                                                                                                   |
| Matched Ions                       | 3:0 C=O+_71.0497(260969.75), 15:0 C=O+_239.2363(6131.1621), M-20:0_383.3155(131044.0078), M-16:0_439.3784(143515.5781), M-4:0_607.5667(92499.6875) |

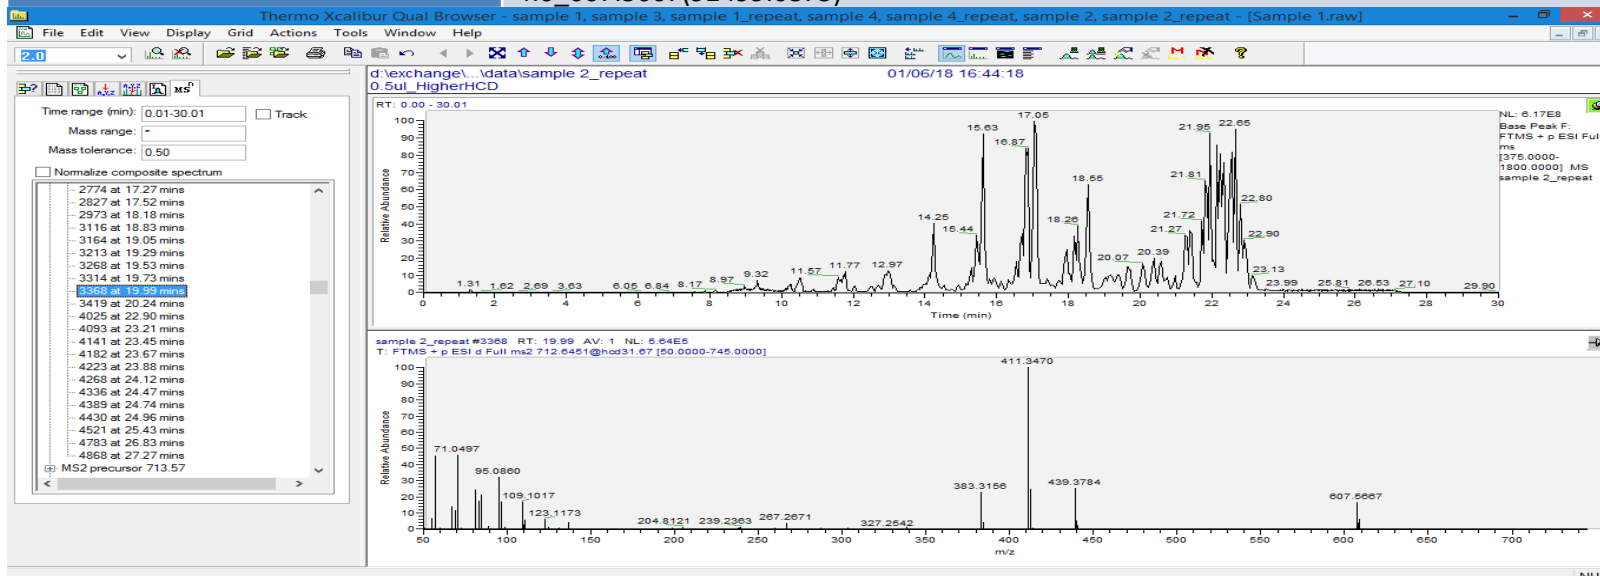

Figure S8 (23): An example MS/MS spectrum of TG 16:0\_20:1\_26:0 that contains the fatty acids 20:1 and 26:0.

|                                       |                                                                                                                     |
|---------------------------------------|---------------------------------------------------------------------------------------------------------------------|
| File Name                             | Sample 1                                                                                                            |
| Scan #                                | 4205                                                                                                                |
| Retention Time                        | 23.4186                                                                                                             |
| m/z                                   | 1018.9739                                                                                                           |
| Chemical Composition                  | [C65H124O6+NH4] 1+                                                                                                  |
| LIPIDMAPS<br>Abbreviation/Common Name | TG(16:0/20:1(11Z)/26:0)                                                                                             |
| Main Class                            | TAG                                                                                                                 |
| Sub Class                             | Triacylglycerols                                                                                                    |
| Lipid ID                              | TG(16:0/20:1(11Z)/26:0)                                                                                             |
| Theoretical m/z                       | 1018.9736                                                                                                           |
| Delta Mass                            | 0.29445 ppm                                                                                                         |
| Group                                 | TG                                                                                                                  |
| LSI ID                                | TG 16:0_20:1_26:0                                                                                                   |
| Short Name                            | TG 62:1                                                                                                             |
| Graded ID                             | TG 16:0_20:1_26:0                                                                                                   |
| Matched Ions                          | 15:0 C=O+ _239.2359(2326.6721), M-26:0_605.5496(24584.4082), M-20:1_691.6559(994.5347), M-16:0_745.7075(21694.2832) |

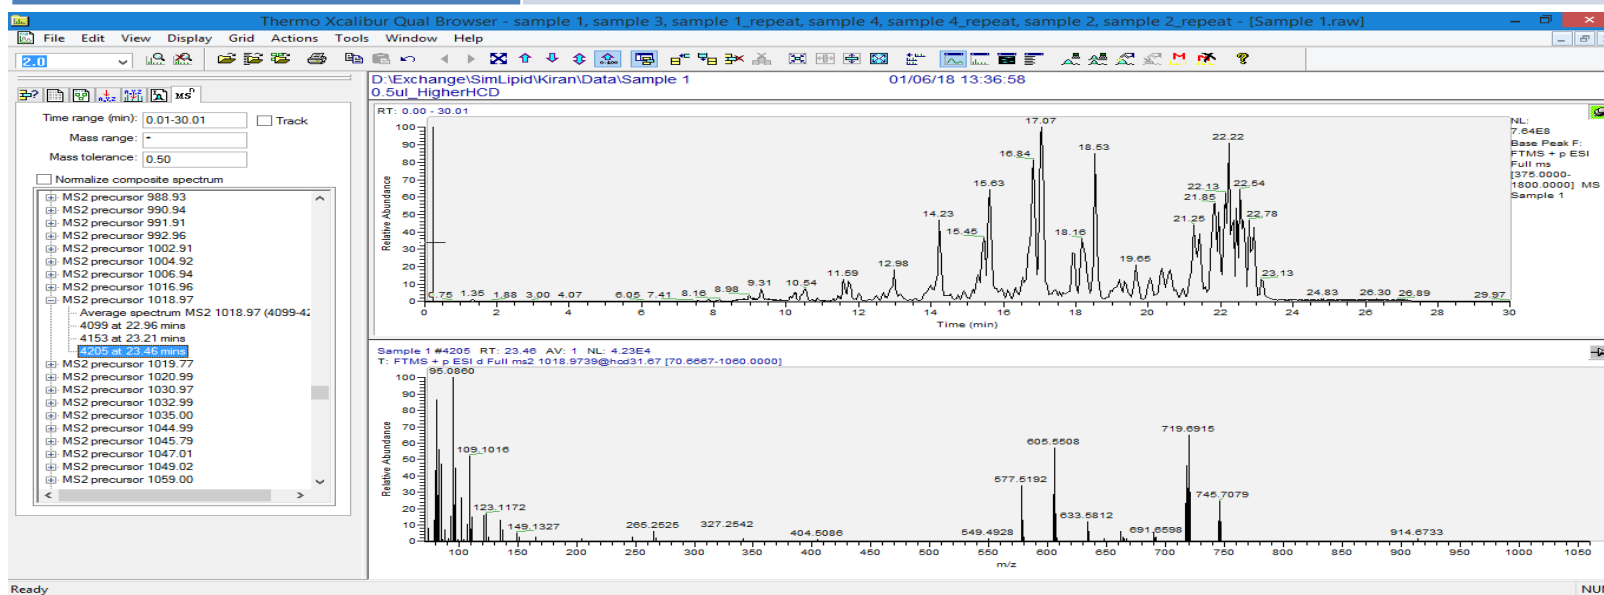

Figure S8 (24): An example MS/MS spectrum of TG 8:0\_14:0\_20:2 that contains 20:2 as one of the fatty acids.

|                                    |                                                                                                                              |
|------------------------------------|------------------------------------------------------------------------------------------------------------------------------|
| File Name                          | Sample 1                                                                                                                     |
| Scan #                             | 2977                                                                                                                         |
| Retention Time                     | 17.9829                                                                                                                      |
| m/z                                | 736.6453                                                                                                                     |
| Chemical Composition               | [C45H82O6+NH4] <sup>1+</sup>                                                                                                 |
| LIPIDMAPS Abbreviation/Common Name | TG(8:0/14:0/20:2(11Z,14Z))                                                                                                   |
| Main Class                         | TAG                                                                                                                          |
| Sub Class                          | Triacylglycerols                                                                                                             |
| Lipid ID                           | TG(8:0/14:0/20:2(11Z,14Z))                                                                                                   |
| Theoretical m/z                    | 736.645                                                                                                                      |
| Delta Mass                         | 0.4073 ppm                                                                                                                   |
| Group                              | TG                                                                                                                           |
| LSI ID                             | TG 8:0_14:0_20:2                                                                                                             |
| Short Name                         | TG 42:2                                                                                                                      |
| Graded ID                          | TG 8:0_14:0_20:2                                                                                                             |
| Matched Ions                       | 7:0 C=O <sup>+</sup> 127.1121(51107.6445), M-20:2 411.3479(7207.793), M-14:0 491.4098(9684.3721), M-8:0 575.5034(38560.1016) |

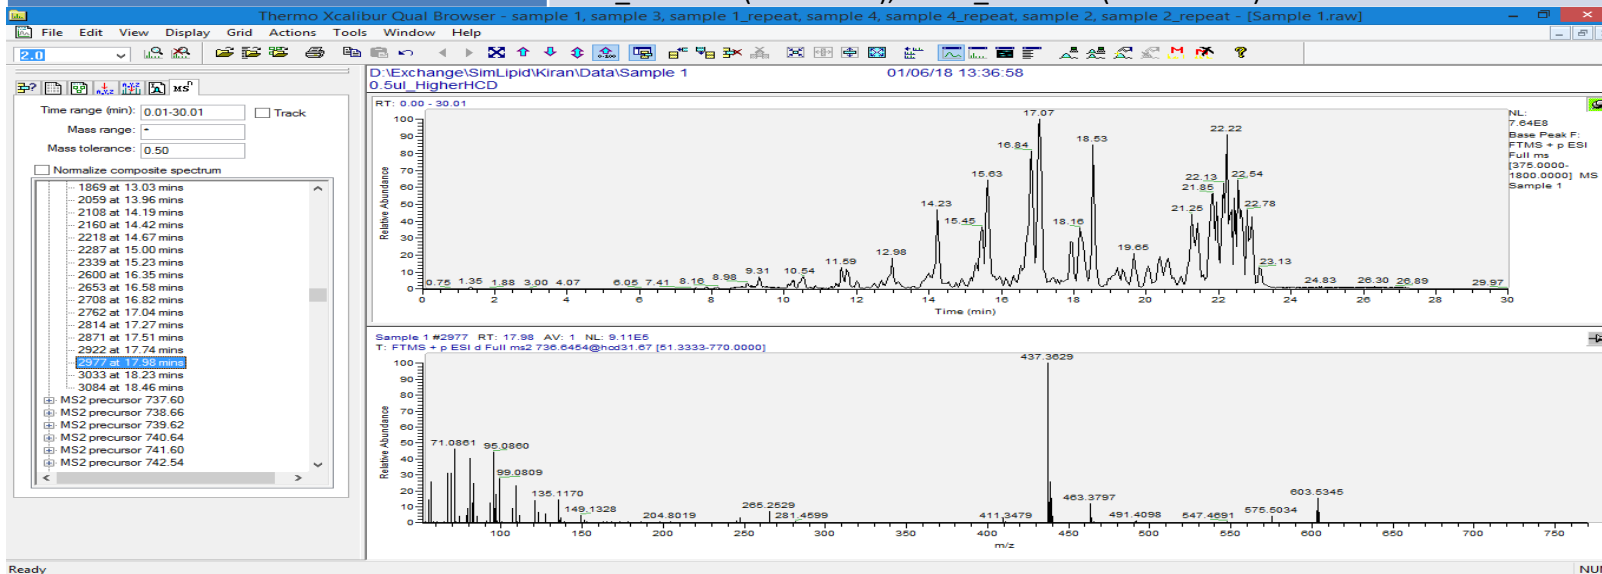

Figure S8 (25): An example MS/MS spectrum of TG 4:0\_18:0\_20:3 that contains 20:3 as one of the fatty acids.

|                                    |                                                                                                                                                                                 |
|------------------------------------|---------------------------------------------------------------------------------------------------------------------------------------------------------------------------------|
| File Name                          | Sample 1_repeat                                                                                                                                                                 |
| Scan #                             | 2827                                                                                                                                                                            |
| Retention Time                     | 17.3034                                                                                                                                                                         |
| m/z                                | 734.6293                                                                                                                                                                        |
| Chemical Composition               | [C45H80O6+NH4] 1+                                                                                                                                                               |
| LIPIDMAPS Abbreviation/Common Name | TG(4:0/18:0/20:3(8Z,11Z,14Z))                                                                                                                                                   |
| Main Class                         | TAG                                                                                                                                                                             |
| Sub Class                          | Triacylglycerols                                                                                                                                                                |
| Lipid ID                           | TG(4:0/18:0/20:3(8Z,11Z,14Z))                                                                                                                                                   |
| Theoretical m/z                    | 734.6293                                                                                                                                                                        |
| Delta Mass                         | 0.0271 ppm                                                                                                                                                                      |
| Group                              | TG                                                                                                                                                                              |
| LSI ID                             | TG 4:0_18:0_20:3                                                                                                                                                                |
| Short Name                         | TG 42:3                                                                                                                                                                         |
| Graded ID                          | TG 4:0_18:0_20:3                                                                                                                                                                |
| Matched Ions                       | 3:0 C=O+ _71.0498(11990.4131), 17:0 C=O+ _267.2691(552.5635), 19:3 C=O+ _289.2525(7000.7554), M-20:3_411.348(16662.8379), M-18:0_433.332(13723.9824), M-4:0_629.5464(2125.3621) |

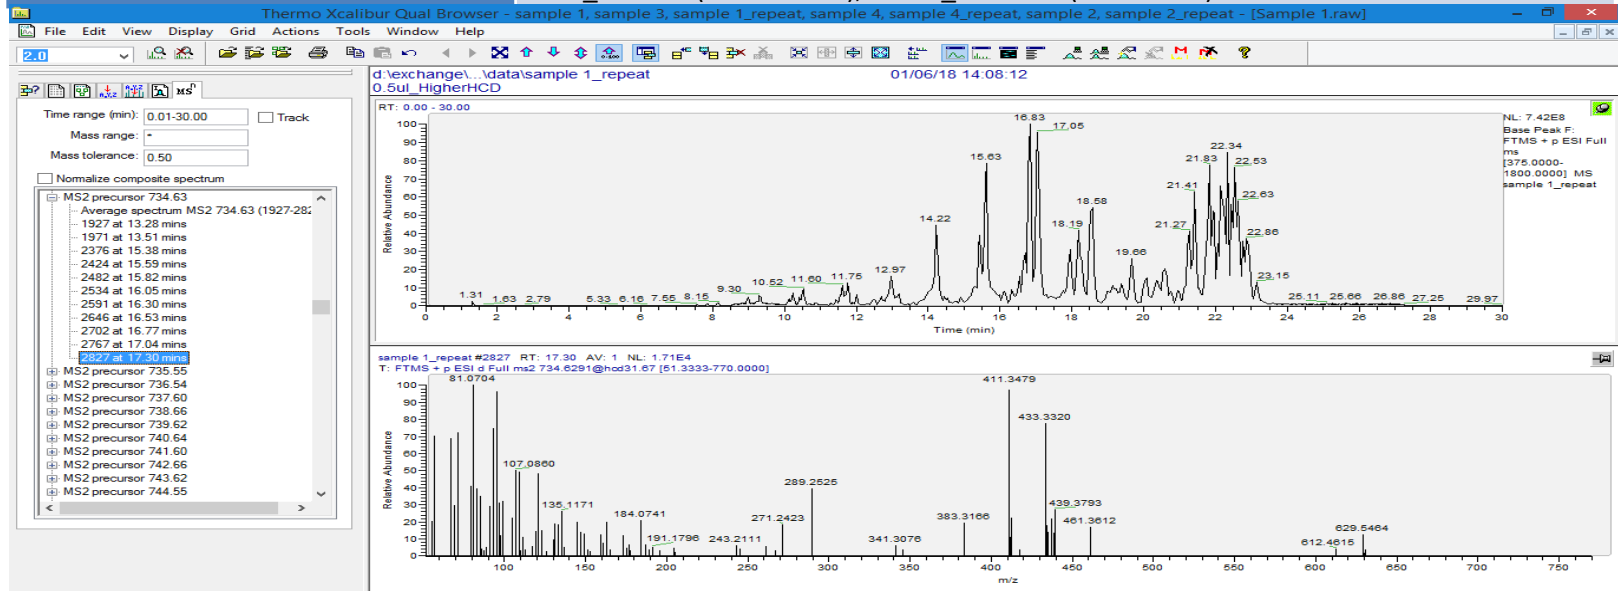



Figure S8 (26): An example MS/MS spectrum of TG 4:0\_16:0\_20:4 that contains 20:4 as one of the fatty acids.

|                                       |                                                                                                                                                                                                   |
|---------------------------------------|---------------------------------------------------------------------------------------------------------------------------------------------------------------------------------------------------|
| File Name                             | Sample 2                                                                                                                                                                                          |
| Scan #                                | 2299                                                                                                                                                                                              |
| Retention Time                        | 15.25                                                                                                                                                                                             |
| m/z                                   | 704.5824                                                                                                                                                                                          |
| Chemical Composition                  | [C43H74O6+NH4] 1+                                                                                                                                                                                 |
| LIPIDMAPS<br>Abbreviation/Common Name | TG(4:0/16:0/20:4(7Z,9Z,11Z,13Z))                                                                                                                                                                  |
| Main Class                            | TAG                                                                                                                                                                                               |
| Sub Class                             | Triacylglycerols                                                                                                                                                                                  |
| Lipid ID                              | TG(4:0/16:0/20:4(7Z,9Z,11Z,13Z))                                                                                                                                                                  |
| Theoretical m/z                       | 704.582338                                                                                                                                                                                        |
| Delta Mass                            | 0.088 ppm                                                                                                                                                                                         |
| Group                                 | TG                                                                                                                                                                                                |
| LSI ID                                | TG 4:0_16:0_20:4                                                                                                                                                                                  |
| Short Name                            | TG 40:4                                                                                                                                                                                           |
| Graded ID                             | TG 4:0_16:0_20:4                                                                                                                                                                                  |
| Matched Ions                          | 3:0 C=O+ _71.0498(24438.962891), 15:0 C=O+ _239.23749(2511.0979), 19:4 C=O+ _287.23749(6816.102539), M-16:0 _431.313586(5204.214355), M-20:4 _383.31785(40236.30469), M-4:0 _599.5023(799.368835) |

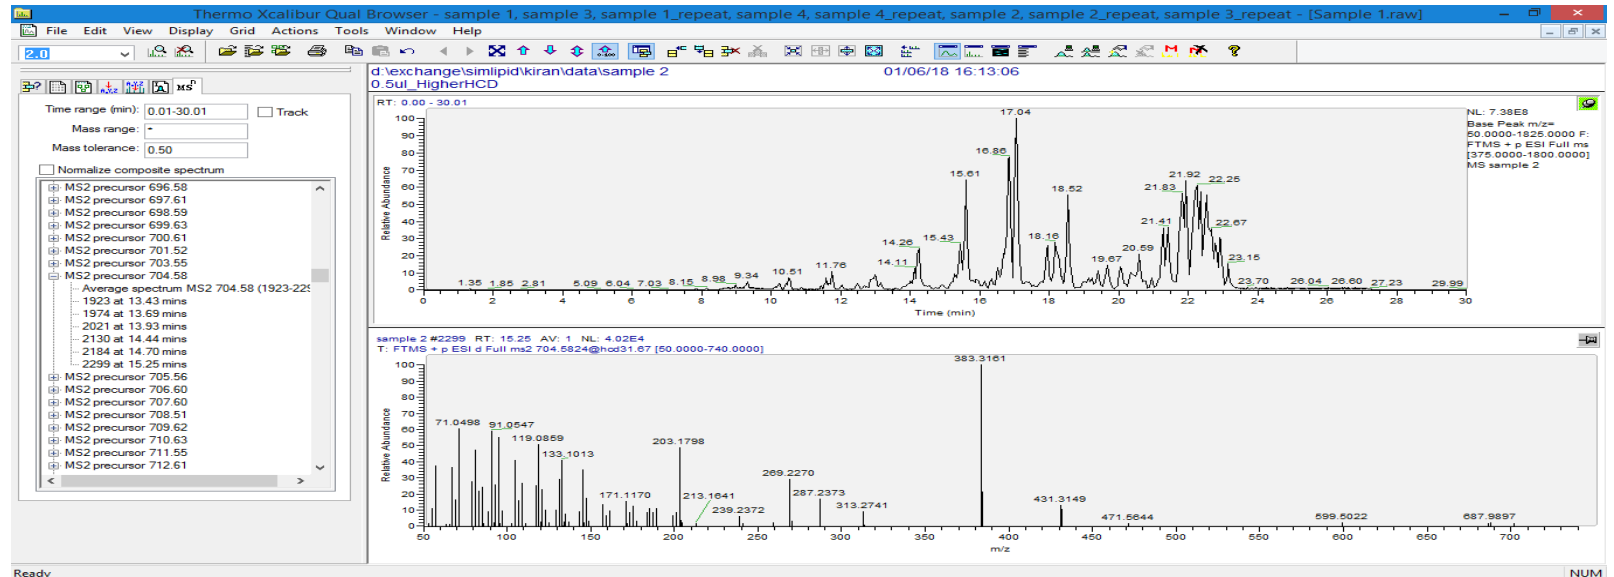

Figure S8 (27): An example MS/MS spectrum of TG 4:0\_16:0\_21:0 that contains 21:0 as one of the fatty acids.

|                                    |                                                                                                                                                                                    |
|------------------------------------|------------------------------------------------------------------------------------------------------------------------------------------------------------------------------------|
| File Name                          | Sample_1_repeat                                                                                                                                                                    |
| Scan #                             | 3569                                                                                                                                                                               |
| Retention Time                     | 20.6611                                                                                                                                                                            |
| m/z                                | 726.6613                                                                                                                                                                           |
| Chemical Composition               | [C44H84O6+NH4] 1+                                                                                                                                                                  |
| LIPIDMAPS Abbreviation/Common Name | TG(4:0/16:0/21:0)                                                                                                                                                                  |
| Main Class                         | TAG                                                                                                                                                                                |
| Sub Class                          | Triacylglycerols                                                                                                                                                                   |
| Lipid ID                           | TG(4:0/16:0/21:0)                                                                                                                                                                  |
| Theoretical m/z                    | 726.6606                                                                                                                                                                           |
| Delta Mass                         | 0.8823 ppm                                                                                                                                                                         |
| Group                              | TG                                                                                                                                                                                 |
| LSI ID                             | TG 4:0_16:0_21:0                                                                                                                                                                   |
| Short Name                         | TG 41:0                                                                                                                                                                            |
| Graded ID                          | TG 4:0_16:0_21:0                                                                                                                                                                   |
| Matched Ions                       | 3:0 C=O+ _71.0498(48228.3633), 15:0 C=O+ _239.2372(1851.4611), 20:0 C=O+ _309.3164(978.4489), M-21:0_383.3159(57547.8633), M-16:0_453.3941(72222.8438), M-4:0_621.5806(14453.2891) |

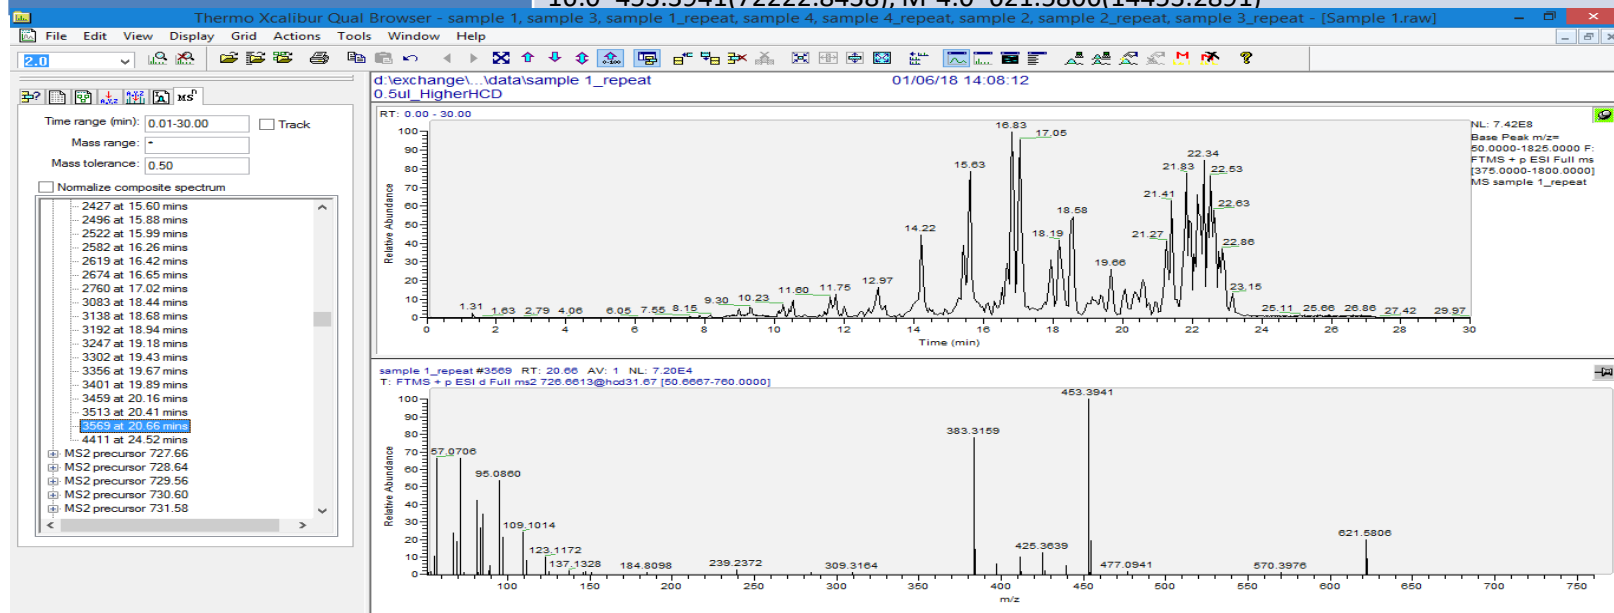

Figure S8 (28): An example MS/MS spectrum of TG 4:0\_14:0\_22:0 that contains 22:0 as one of the fatty acids.

|                                    |                                                                                                                                                               |
|------------------------------------|---------------------------------------------------------------------------------------------------------------------------------------------------------------|
| File Name                          | Sample 1_repeat                                                                                                                                               |
| Scan #                             | 3411                                                                                                                                                          |
| Retention Time                     | 19.9319                                                                                                                                                       |
| m/z                                | 712.6456                                                                                                                                                      |
| Chemical Composition               | [C43H82O6+NH4] 1+                                                                                                                                             |
| LIPIDMAPS Abbreviation/Common Name | TG(4:0/14:0/22:0)                                                                                                                                             |
| Main Class                         | TAG                                                                                                                                                           |
| Sub Class                          | Triacylglycerols                                                                                                                                              |
| Lipid ID                           | TG(4:0/14:0/22:0)                                                                                                                                             |
| Theoretical m/z                    | 712.645                                                                                                                                                       |
| Delta Mass                         | 0.9349 ppm                                                                                                                                                    |
| Group                              | TG                                                                                                                                                            |
| LSI ID                             | TG 4:0_14:0_22:0                                                                                                                                              |
| Short Name                         | TG 40:0                                                                                                                                                       |
| Graded ID                          | TG 4:0_14:0_22:0                                                                                                                                              |
| Matched Ions                       | 3:0 C=O+ <sub>71.0498(134511.25)</sub> , M-22:0 <sub>355.2833(8715.5381)</sub> , M-14:0 <sub>467.408(8956.5488)</sub> , M-4:0 <sub>607.5665(54056.0273)</sub> |

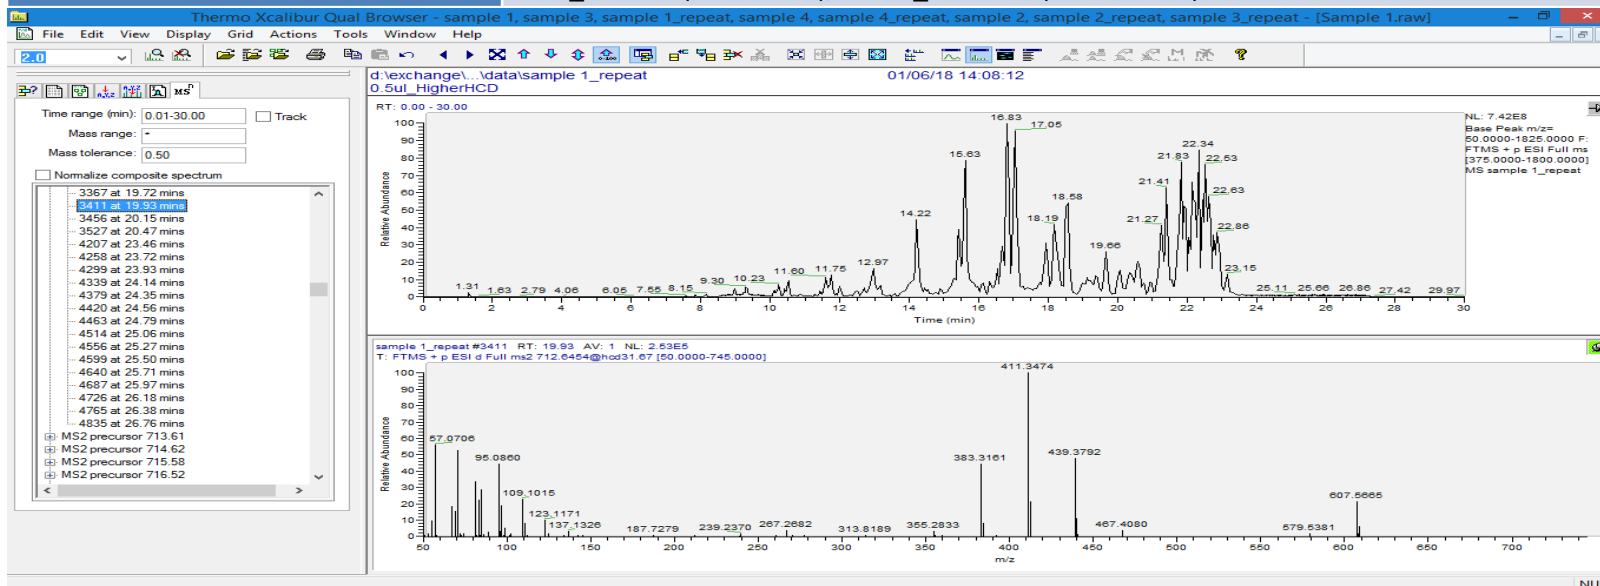

Figure S8 (29): An example MS/MS spectrum of TG **16:0\_22:1\_24:0** that contains 24:0 as one of the fatty acids.

|                                    |                                                                                                                      |
|------------------------------------|----------------------------------------------------------------------------------------------------------------------|
| File Name                          | Sample 4_repeat                                                                                                      |
| Scan #                             | 4209                                                                                                                 |
| Retention Time                     | 23.4404                                                                                                              |
| m/z                                | 1018.9741                                                                                                            |
| Chemical Composition               | [C65H124O6+NH4] 1+                                                                                                   |
| LIPIDMAPS Abbreviation/Common Name | TG(16:0/22:1(13Z)/24:0)                                                                                              |
| Main Class                         | TAG                                                                                                                  |
| Sub Class                          | Triacylglycerols                                                                                                     |
| Lipid ID                           | TG(16:0/22:1(13Z)/24:0)                                                                                              |
| Theoretical m/z                    | 1018.9736                                                                                                            |
| Delta Mass                         | 0.4367 ppm                                                                                                           |
| Group                              | TG                                                                                                                   |
| LSI ID                             | TG 16:0_22:1_24:0                                                                                                    |
| Short Name                         | TG 62:1                                                                                                              |
| Graded ID                          | TG 16:0_22:1_24:0                                                                                                    |
| Matched Ions                       | 15:0 C=O+ _239.2361(988.7972), M-24:0 _633.5803(4540.0498), M-22:1 _663.6274(6191.4751), M-16:0 _745.7093(7662.4243) |

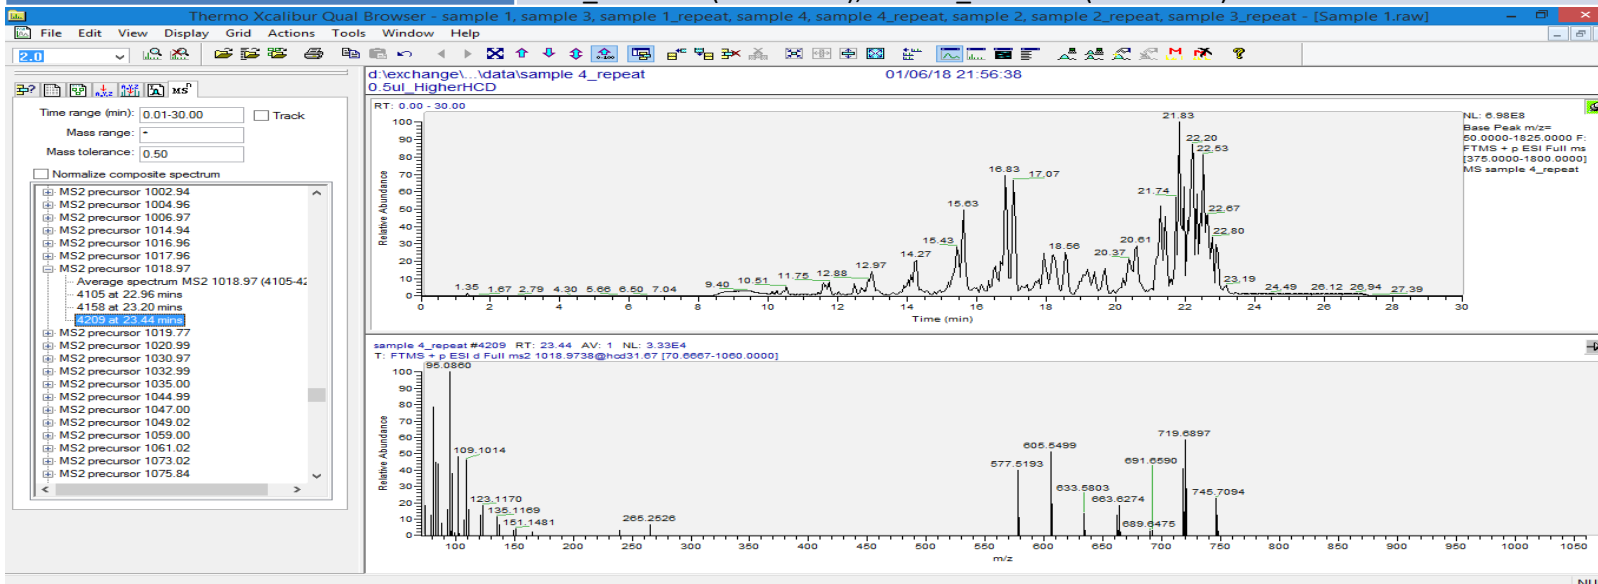

Figure S8 (30): An example MS/MS spectrum of TG 14:0\_16:0\_22:5 that contains 22:5 as one of the fatty acids.

|                                    |                                                                                                                              |
|------------------------------------|------------------------------------------------------------------------------------------------------------------------------|
| File Name                          | Sample 1                                                                                                                     |
| Scan #                             | 3663                                                                                                                         |
| Retention Time                     | 21.11                                                                                                                        |
| m/z                                | 870.7543                                                                                                                     |
| Chemical Composition               | [C55H96O6+NH4] 1+                                                                                                            |
| LIPIDMAPS Abbreviation/Common Name | TG(14:0/16:0/22:5(6Z,9Z,11Z,13Z,15Z))                                                                                        |
| Main Class                         | TAG                                                                                                                          |
| Sub Class                          | Triacylglycerols                                                                                                             |
| Lipid ID                           | TG(14:0/16:0/22:5(6Z,9Z,11Z,13Z,15Z))                                                                                        |
| Theoretical m/z                    | 870.754488                                                                                                                   |
| Delta Mass                         | 0.2159 ppm                                                                                                                   |
| Group                              | TG                                                                                                                           |
| LSI ID                             | TG 14:0_16:0_22:5                                                                                                            |
| Short Name                         | TG 52:5                                                                                                                      |
| Graded ID                          | TG 14:0_16:0_22:5                                                                                                            |
| Matched Ions                       | 13:0 C=O+ 211.20695(932.551025), M-14:0_625.522354(1104.566895),M-16:0_597.49117(2574.538086),M-22:5_523.475876(5912.317871) |

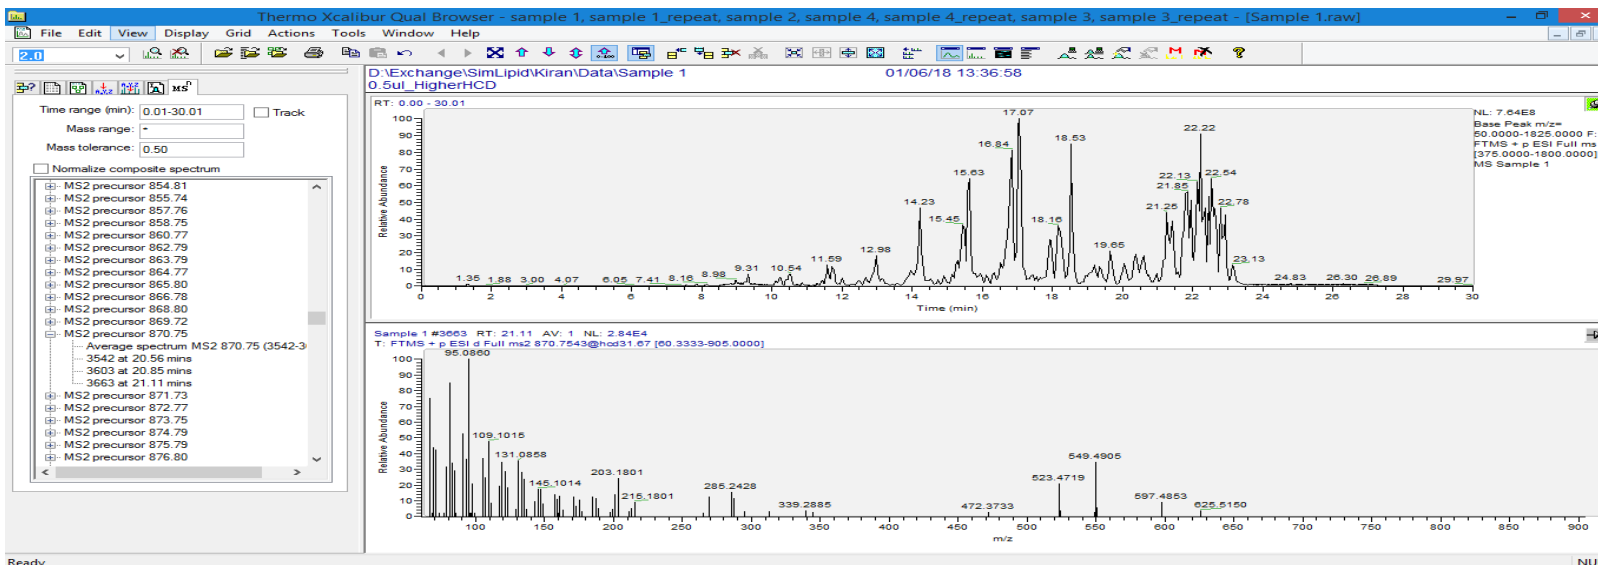

Figure S8 (31): An example MS/MS spectrum of TG 19:0\_19:1\_23:0 that contains 23:0 as one of the fatty acids.

|                                    |                                                                                   |
|------------------------------------|-----------------------------------------------------------------------------------|
| File Name                          | Sample 1                                                                          |
| Scan #                             | 4188                                                                              |
| Retention Time                     | 23.3794                                                                           |
| m/z                                | 1004.9576                                                                         |
| Chemical Composition               | [C64H122O6+NH4] <sup>1+</sup>                                                     |
| LIPIDMAPS Abbreviation/Common Name | TG(19:0/19:1(9Z)/23:0)                                                            |
| Main Class                         | TAG                                                                               |
| Sub Class                          | Triacylglycerols                                                                  |
| Lipid ID                           | TG(19:0/19:1(9Z)/23:0)                                                            |
| Theoretical m/z                    | 1004.958                                                                          |
| Delta Mass                         | 0.3826 ppm                                                                        |
| Group                              | TG                                                                                |
| LSI ID                             | TG 19:0_19:1_23:0                                                                 |
| Short Name                         | TG 61:1                                                                           |
| Graded ID                          | TG 19:0_19:1_23:0                                                                 |
| Matched Ions                       | M-23:0_633.577(3553.2925), M-19:1_691.6587(962.2806), M-19:0_706.6772(12579.5098) |

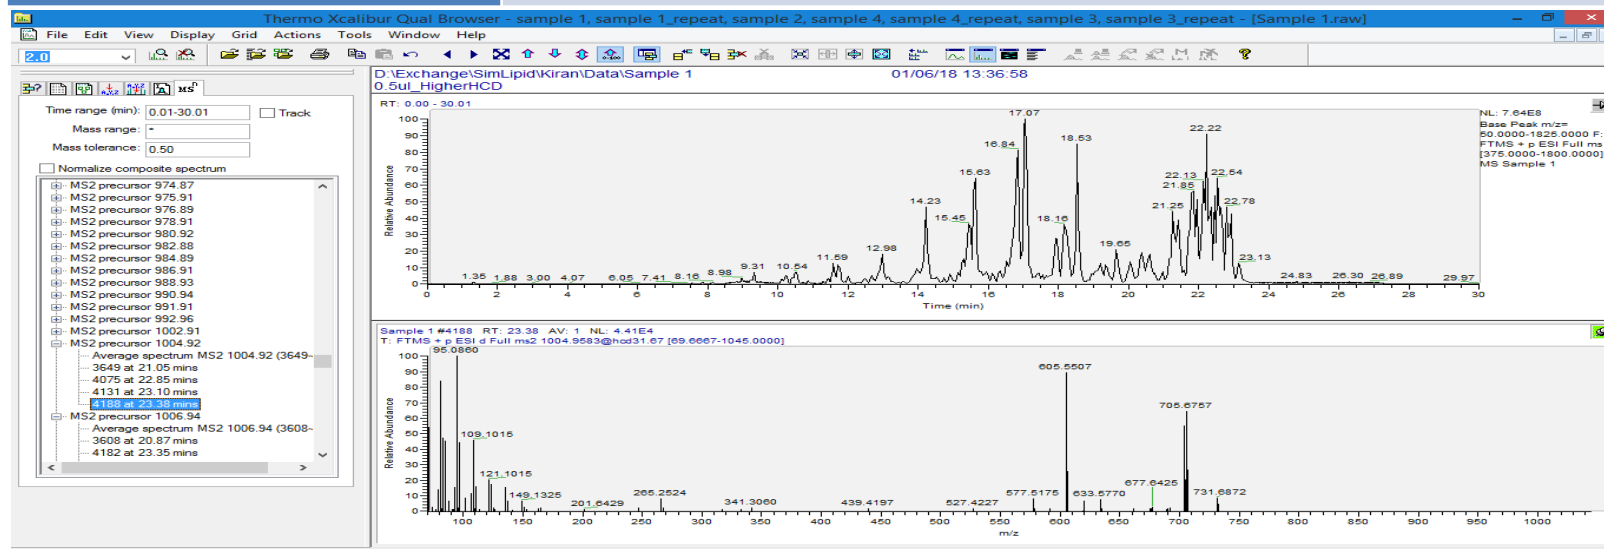

Figure S8 (32): An example MS/MS spectrum of TG 18:0\_18:1\_23:1 that contains 23:1 as one of the fatty acids.

|                                    |                                                                                                                      |
|------------------------------------|----------------------------------------------------------------------------------------------------------------------|
| File Name                          | Sample 4_repeat                                                                                                      |
| Scan #                             | 4119                                                                                                                 |
| Retention Time                     | 23.014                                                                                                               |
| m/z                                | 974.9112                                                                                                             |
| Chemical Composition               | [C62H116O6+NH4] 1+                                                                                                   |
| LIPIDMAPS Abbreviation/Common Name | TG(18:0/18:1(9Z)/23:1(15Z))                                                                                          |
| Main Class                         | TAG                                                                                                                  |
| Sub Class                          | Triacylglycerols                                                                                                     |
| Lipid ID                           | TG(18:0/18:1(9Z)/23:1(15Z))                                                                                          |
| Theoretical m/z                    | 974.911                                                                                                              |
| Delta Mass                         | 0.1836 ppm                                                                                                           |
| Group                              | TG                                                                                                                   |
| LSI ID                             | TG 18:0_18:1_23:1                                                                                                    |
| Short Name                         | TG 59:2                                                                                                              |
| Graded ID                          | TG 18:0_18:1_23:1                                                                                                    |
| Matched Ions                       | 17:1 C=O+_265.2529(6831.1196), M-23:1_605.5506(22797.3203), M-18:0_673.6116(14319.4453), M-18:1_675.6296(77436.2734) |

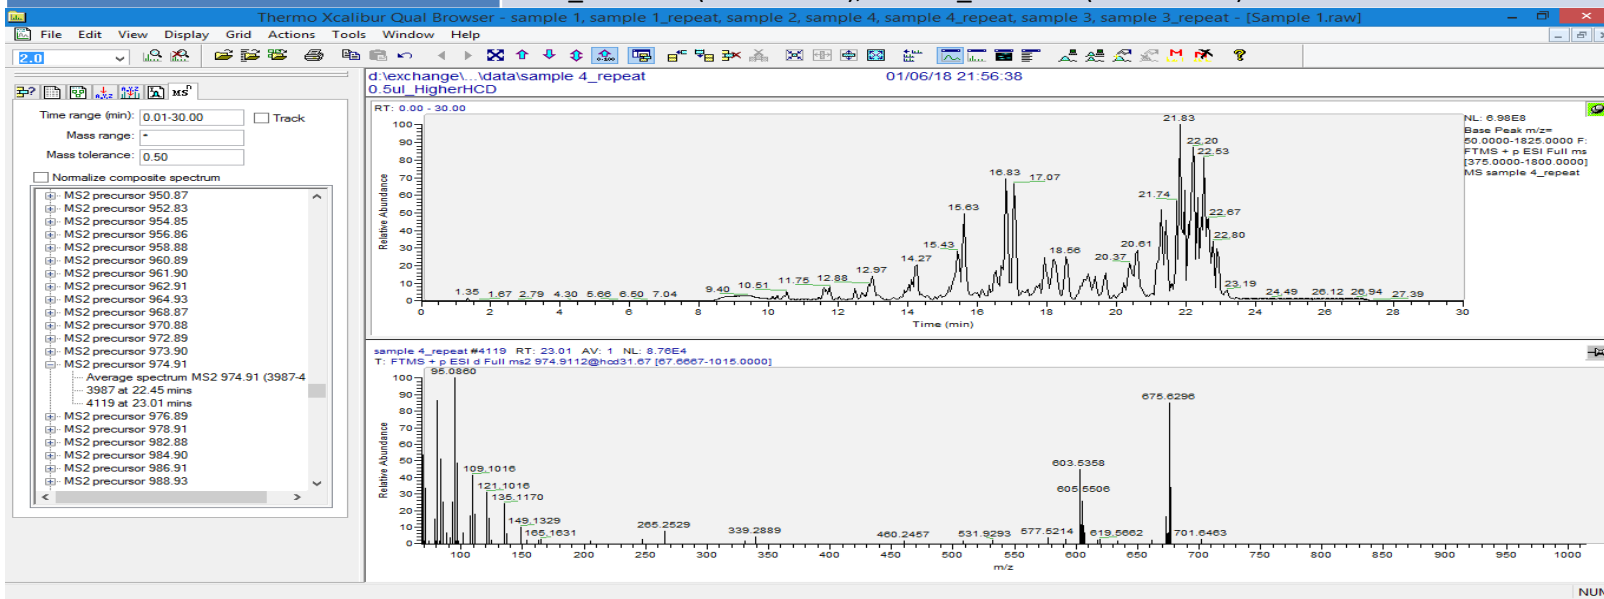

Figure S8 (33): An example MS/MS spectrum of TG 16:0\_22:1\_24:0 that contains 24:0 as one of the fatty acids.

|                                       |                                                                                                                      |
|---------------------------------------|----------------------------------------------------------------------------------------------------------------------|
| File Name                             | Sample 4_repeat                                                                                                      |
| Scan #                                | 4209                                                                                                                 |
| Retention Time                        | 23.4404                                                                                                              |
| m/z                                   | 1018.9741                                                                                                            |
| Chemical Composition                  | [C65H124O6+NH4] 1+                                                                                                   |
| LIPIDMAPS<br>Abbreviation/Common Name | TG(16:0/22:1(13Z)/24:0)                                                                                              |
| Main Class                            | TAG                                                                                                                  |
| Sub Class                             | Triacylglycerols                                                                                                     |
| Lipid ID                              | TG(16:0/22:1(13Z)/24:0)                                                                                              |
| Theoretical m/z                       | 1018.9736                                                                                                            |
| Delta Mass                            | 0.4367 ppm                                                                                                           |
| Group                                 | TG                                                                                                                   |
| LSI ID                                | TG 16:0_22:1_24:0                                                                                                    |
| Short Name                            | TG 62:1                                                                                                              |
| Graded ID                             | TG 16:0_22:1_24:0                                                                                                    |
| Matched Ions                          | 15:0 C=O+ _239.2361(988.7972), M-24:0 _633.5803(4540.0498), M-22:1 _663.6274(6191.4751), M-16:0 _745.7093(7662.4243) |

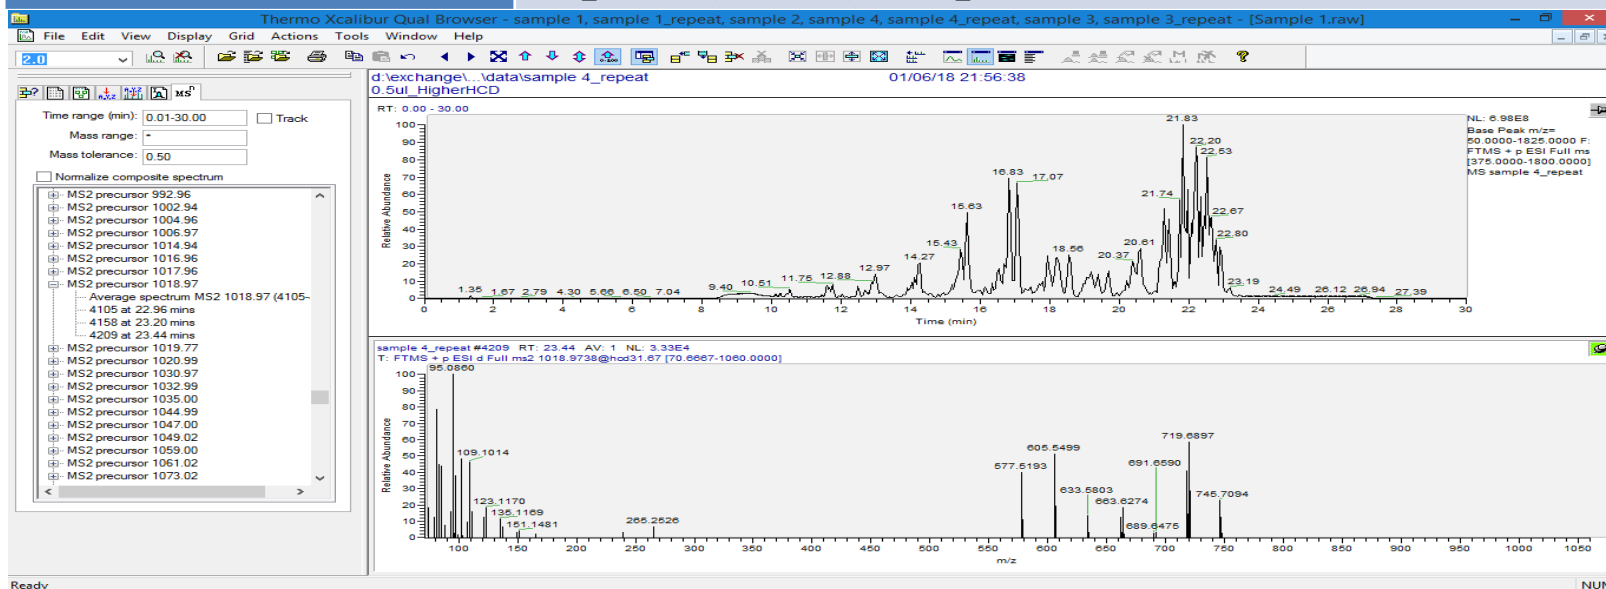



Figure S8 (34): An example MS/MS spectrum of TG TG 18:1\_18:1\_24:1 that contains 24:1 as one of the fatty acids.

|                                       |                                                                                                                       |
|---------------------------------------|-----------------------------------------------------------------------------------------------------------------------|
| File Name                             | Sample 4                                                                                                              |
| Scan #                                | 4088                                                                                                                  |
| Retention Time                        | 22.8279                                                                                                               |
| m/z                                   | 986.9114                                                                                                              |
| Chemical Composition                  | [C63H116O6+NH4] 1+                                                                                                    |
| LIPIDMAPS<br>Abbreviation/Common Name | TG(18:1(9Z)/18:1(9Z)/24:1(15Z))                                                                                       |
| Main Class                            | TAG                                                                                                                   |
| Sub Class                             | Triacylglycerols                                                                                                      |
| Lipid ID                              | TG(18:1(9Z)/18:1(9Z)/24:1(15Z))                                                                                       |
| Theoretical m/z                       | 986.911                                                                                                               |
| Delta Mass                            | 0.3669 ppm                                                                                                            |
| Group                                 | TG                                                                                                                    |
| LSI ID                                | TG 18:1_18:1_24:1                                                                                                     |
| Short Name                            | TG 60:3                                                                                                               |
| Graded ID                             | TG 18:1_18:1_24:1                                                                                                     |
| Matched Ions                          | 17:1 C=O+_265.2524(6603.5547), 23:1 C=O+_349.3456(2621.0298), M-24:1_603.5355(39123.6328), M-18:1_687.629(58456.4727) |

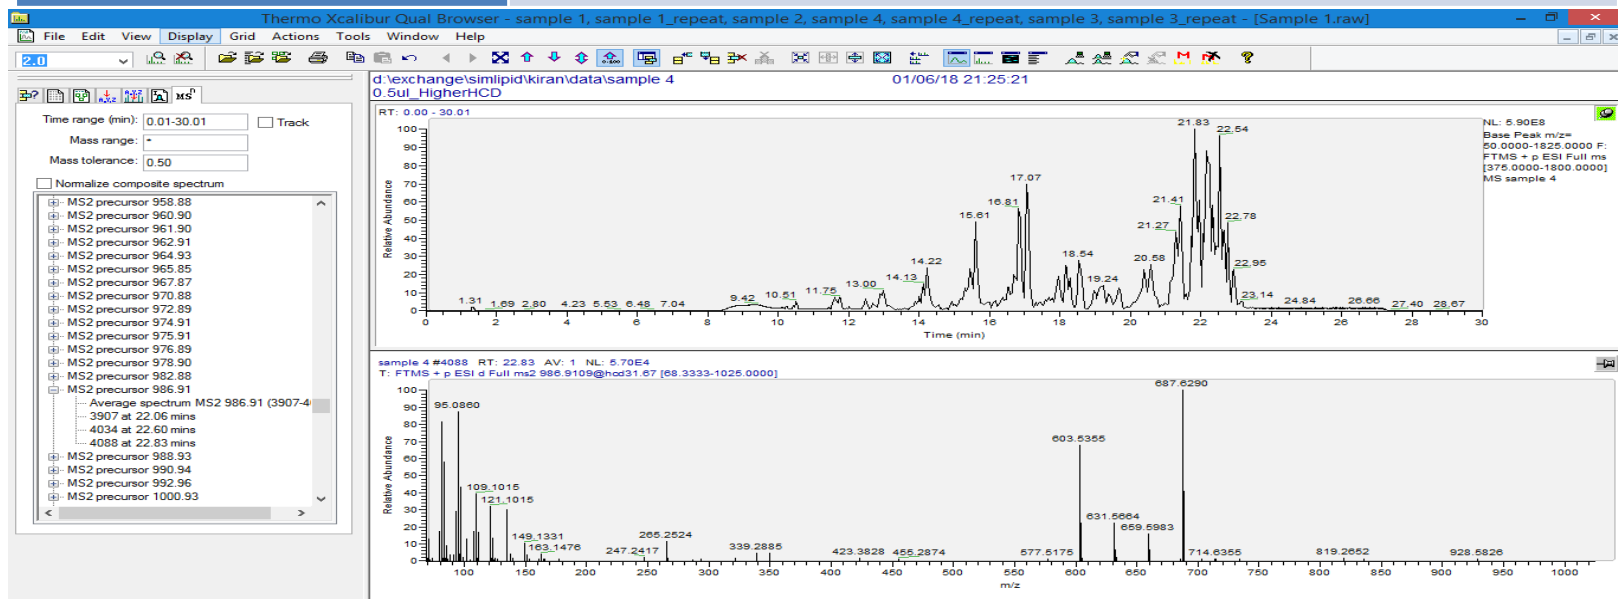

Figure S8 (35): An example MS/MS spectrum of TG 18:1\_18:1\_25:0 that contains 25:0 as one of the fatty acids.

|                                       |                                                                                                                                                   |
|---------------------------------------|---------------------------------------------------------------------------------------------------------------------------------------------------|
| File Name                             | Sample 1_repeat                                                                                                                                   |
| Scan #                                | 4189                                                                                                                                              |
| Retention Time                        | 23.3722                                                                                                                                           |
| m/z                                   | 1004.9577                                                                                                                                         |
| Chemical Composition                  | [C64H122O6+NH4] 1+                                                                                                                                |
| LIPIDMAPS<br>Abbreviation/Common Name | TG(18:0/18:1(11Z)/25:0)                                                                                                                           |
| Main Class                            | TAG                                                                                                                                               |
| Sub Class                             | Triacylglycerols                                                                                                                                  |
| Lipid ID                              | TG(18:0/18:1(11Z)/25:0)                                                                                                                           |
| Theoretical m/z                       | 1004.958                                                                                                                                          |
| Delta Mass                            | 0.2611 ppm                                                                                                                                        |
| Group                                 | TG                                                                                                                                                |
| LSI ID                                | TG 18:0_18:1_25:0                                                                                                                                 |
| Short Name                            | TG 61:1                                                                                                                                           |
| Graded ID                             | TG 18:0_18:1_25:0                                                                                                                                 |
| Matched Ions                          | 17:1 C=O+ 265.2532(6511.7666), 17:0 C=O+ 267.2697(989.1013), M-25:0_605.5505(73100.7109), M-18:0_703.6603(47805.8516), M-18:1_705.6761(52641.707) |

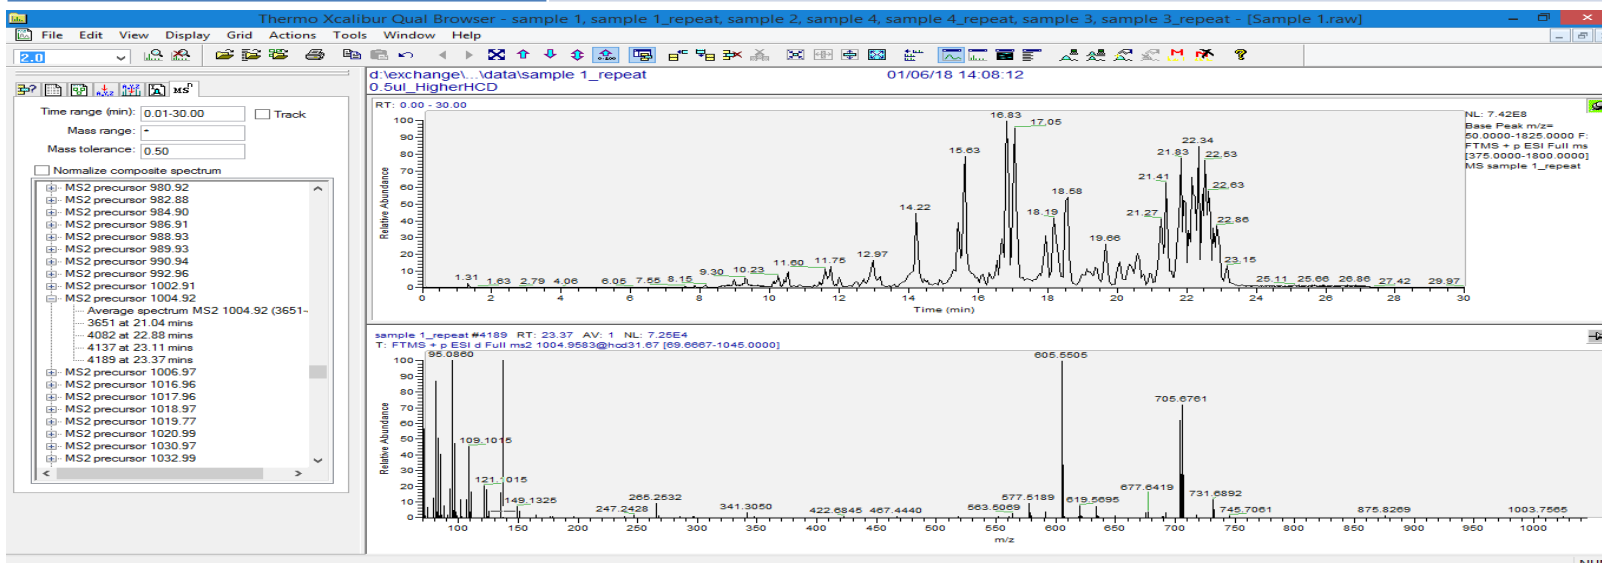

Figure S8 (36): An example MS/MS spectrum of TG 16:0\_18:1\_28:0 that contains 28:0 as one of the fatty acids.

|                                    |                                                                                                                                                     |
|------------------------------------|-----------------------------------------------------------------------------------------------------------------------------------------------------|
| File Name                          | Sample 3                                                                                                                                            |
| Scan #                             | 4061                                                                                                                                                |
| Retention Time                     | 23.4186                                                                                                                                             |
| m/z                                | 1018.9736                                                                                                                                           |
| Chemical Composition               | [C65H124O6+NH4] 1+                                                                                                                                  |
| LIPIDMAPS Abbreviation/Common Name | TG(16:0/18:1(11Z)/28:0)                                                                                                                             |
| Main Class                         | TAG                                                                                                                                                 |
| Sub Class                          | Triacylglycerols                                                                                                                                    |
| Lipid ID                           | TG(16:0/18:1(11Z)/28:0)                                                                                                                             |
| Theoretical m/z                    | 1018.9736                                                                                                                                           |
| Delta Mass                         | 0.0425 ppm                                                                                                                                          |
| Group                              | TG                                                                                                                                                  |
| LSI ID                             | TG 16:0_18:1_28:0                                                                                                                                   |
| Short Name                         | TG 62:1                                                                                                                                             |
| Graded ID                          | TG 16:0_18:1_28:0                                                                                                                                   |
| Matched Ions                       | 15:0 C=O+ 239.2359(2326.6721), 17:1 C=O+ 265.2522(4266.9341), M-28:0 577.5195(46372.1562), M-18:1 719.6909(42828.0312), M-16:0 745.7075(21694.2832) |

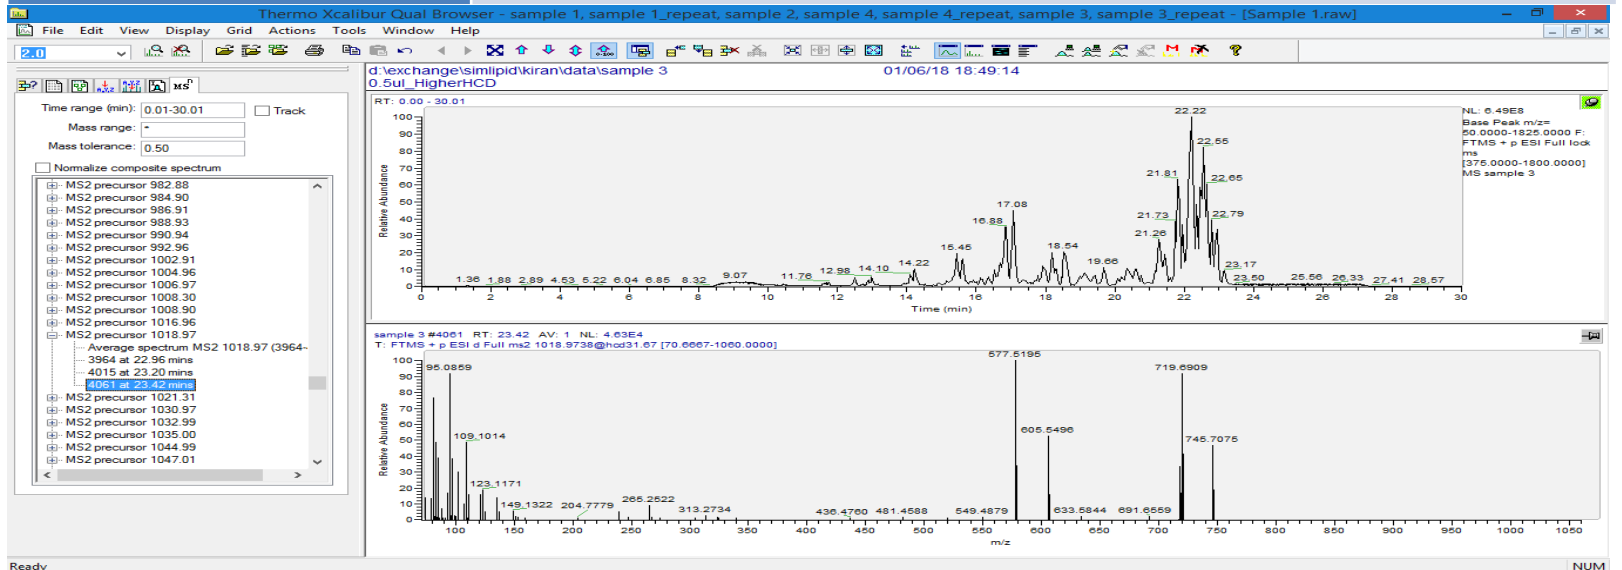

Figure S8 (37): An example MS/MS spectrum of TG 16:0\_16:0\_30:0 that contains 30:0 as one of the fatty acids.

|                                    |                                                                                      |
|------------------------------------|--------------------------------------------------------------------------------------|
| File Name                          | Sample 1_repeat                                                                      |
| Scan #                             | 4254                                                                                 |
| Retention Time                     | 23.7006                                                                              |
| m/z                                | 1020.9891                                                                            |
| Chemical Composition               | [C65H126O6+NH4] 1+                                                                   |
| LIPIDMAPS Abbreviation/Common Name | TG(16:0/16:0/30:0)                                                                   |
| Main Class                         | TAG                                                                                  |
| Sub Class                          | Triacylglycerols                                                                     |
| Lipid ID                           | TG(16:0/16:0/30:0)                                                                   |
| Theoretical m/z                    | 1020.9893                                                                            |
| Delta Mass                         | 0.1268 ppm                                                                           |
| Group                              | TG                                                                                   |
| LSI ID                             | TG 16:0_16:0_30:0                                                                    |
| Short Name                         | TG 62:0                                                                              |
| Graded ID                          | TG 16:0_16:0_30:0                                                                    |
| Matched Ions                       | 15:0 C=O+ 239.2361(538.6237), M-30:0 551.5041(3648.1958), M-16:0 747.7242(6314.2481) |

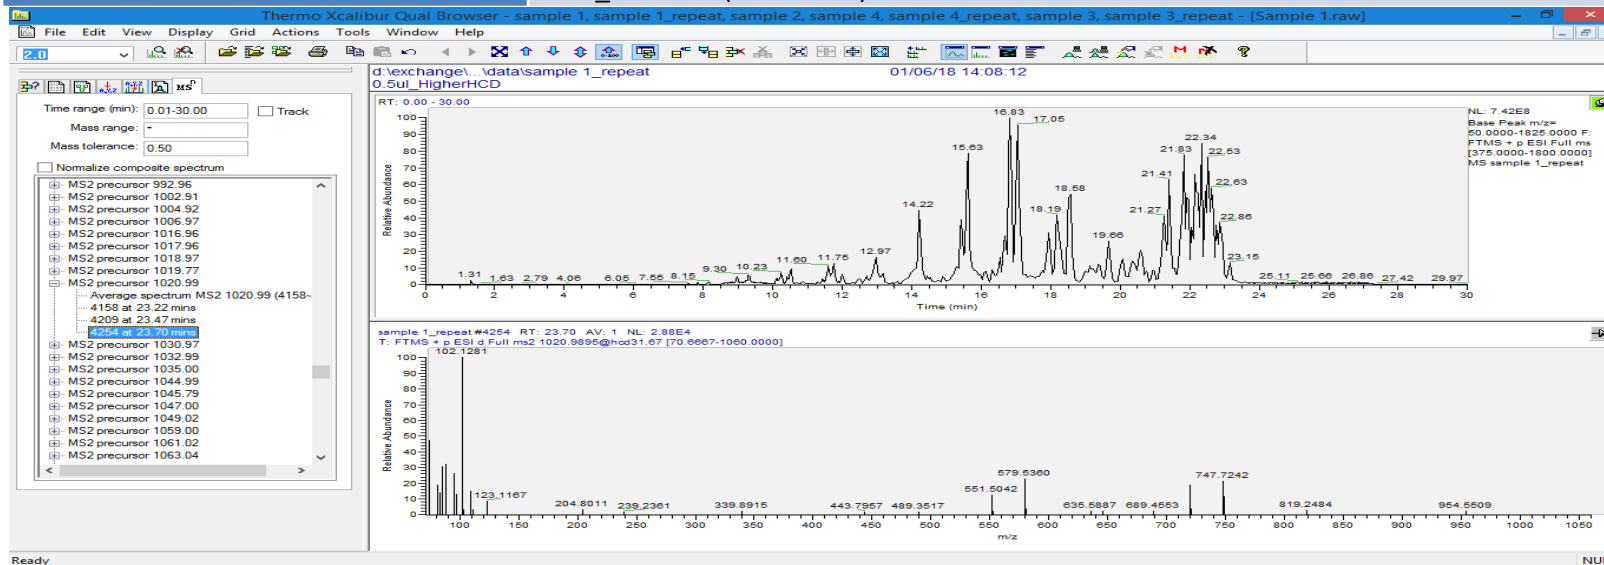

Figure S9: MS2 spectra annotated with neutral loss of fatty acids from the parent ion of the lipid molecular species with Group -ID TG 20:4.

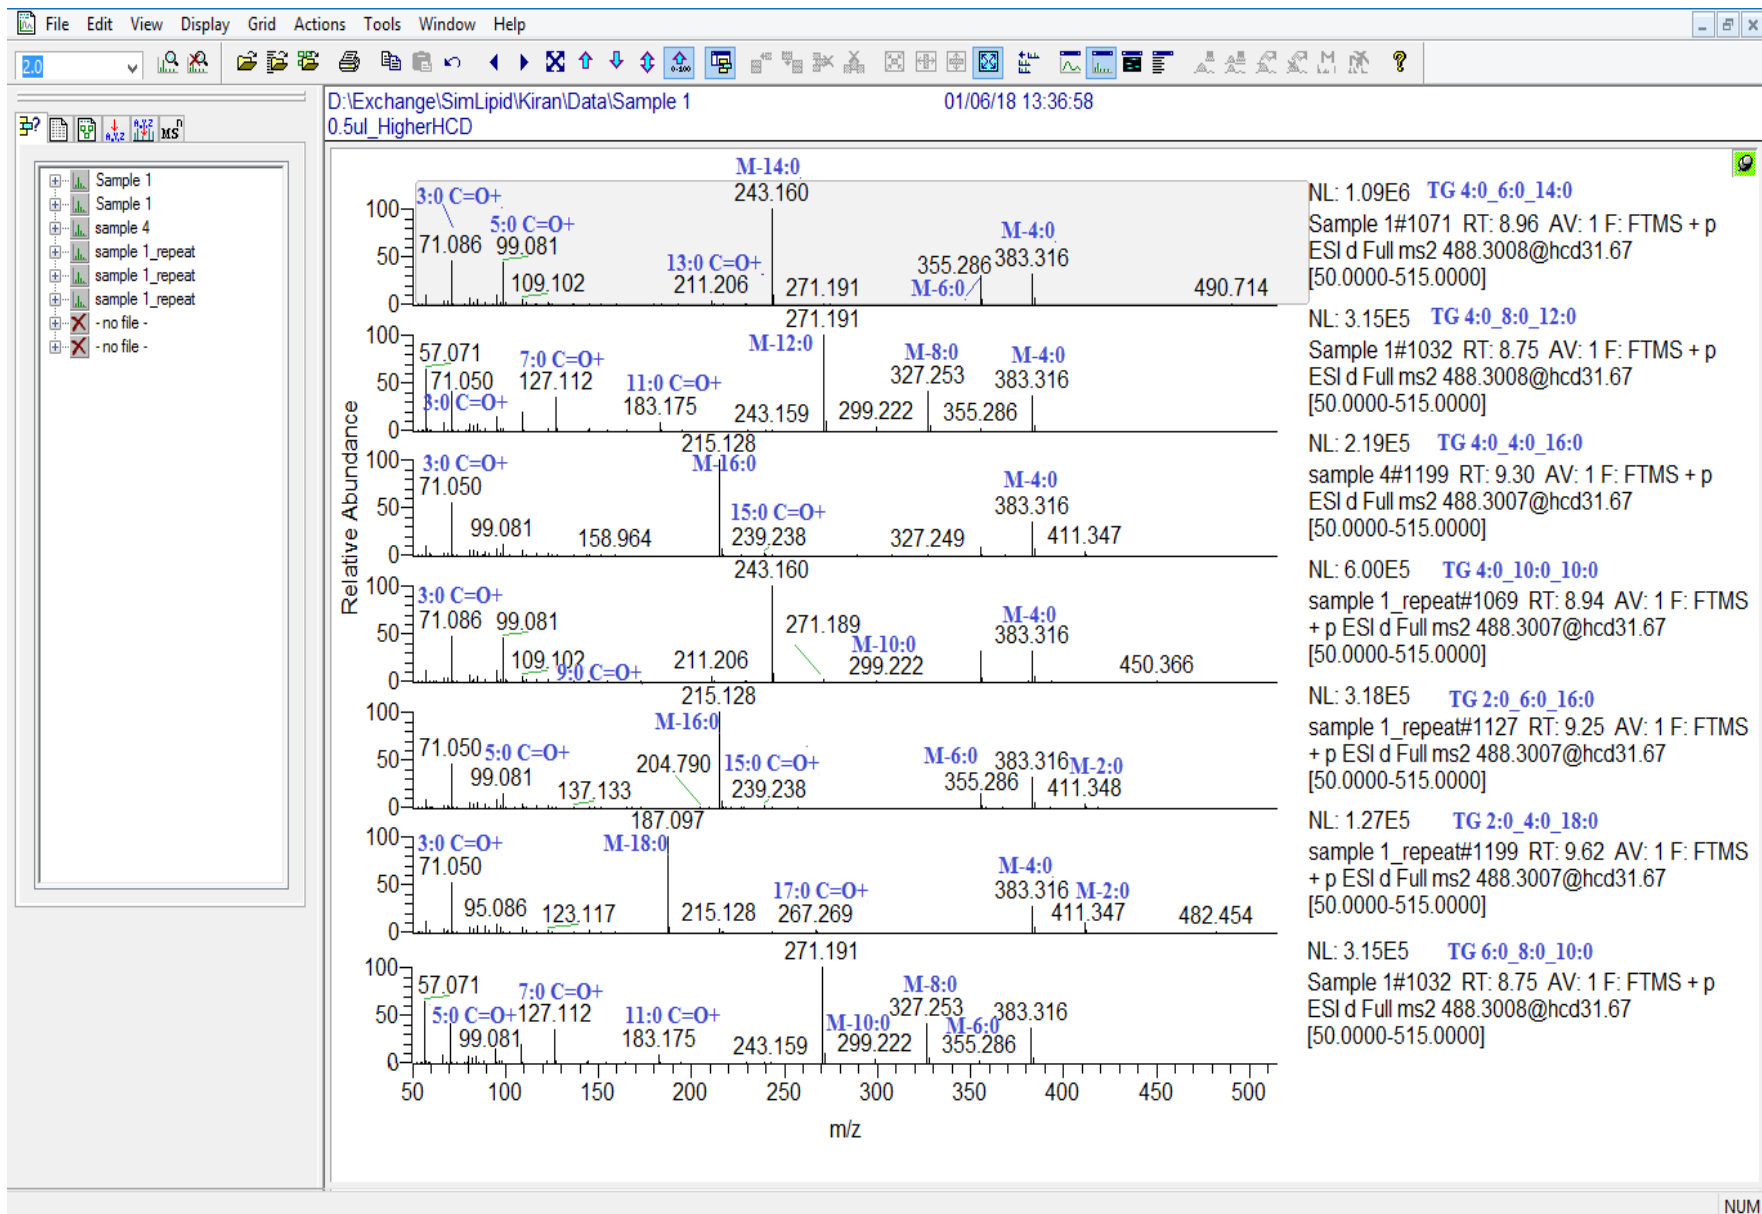

Figure S10: A typical screenshot of Thermo Fisher Scientific's Xcalibur software graphical user interface showing XICs of two molecular ions of the Group-ID TG 40:2 with parent ion masses 656.5829 ([TG 40:2+NH<sub>4</sub>]<sup>+</sup>), and 661.5376 ([TG 40:2+Na]<sup>+</sup>). The spectra displayed in the lower panel of the graphical user interface were manually stacked for easy data visualization.

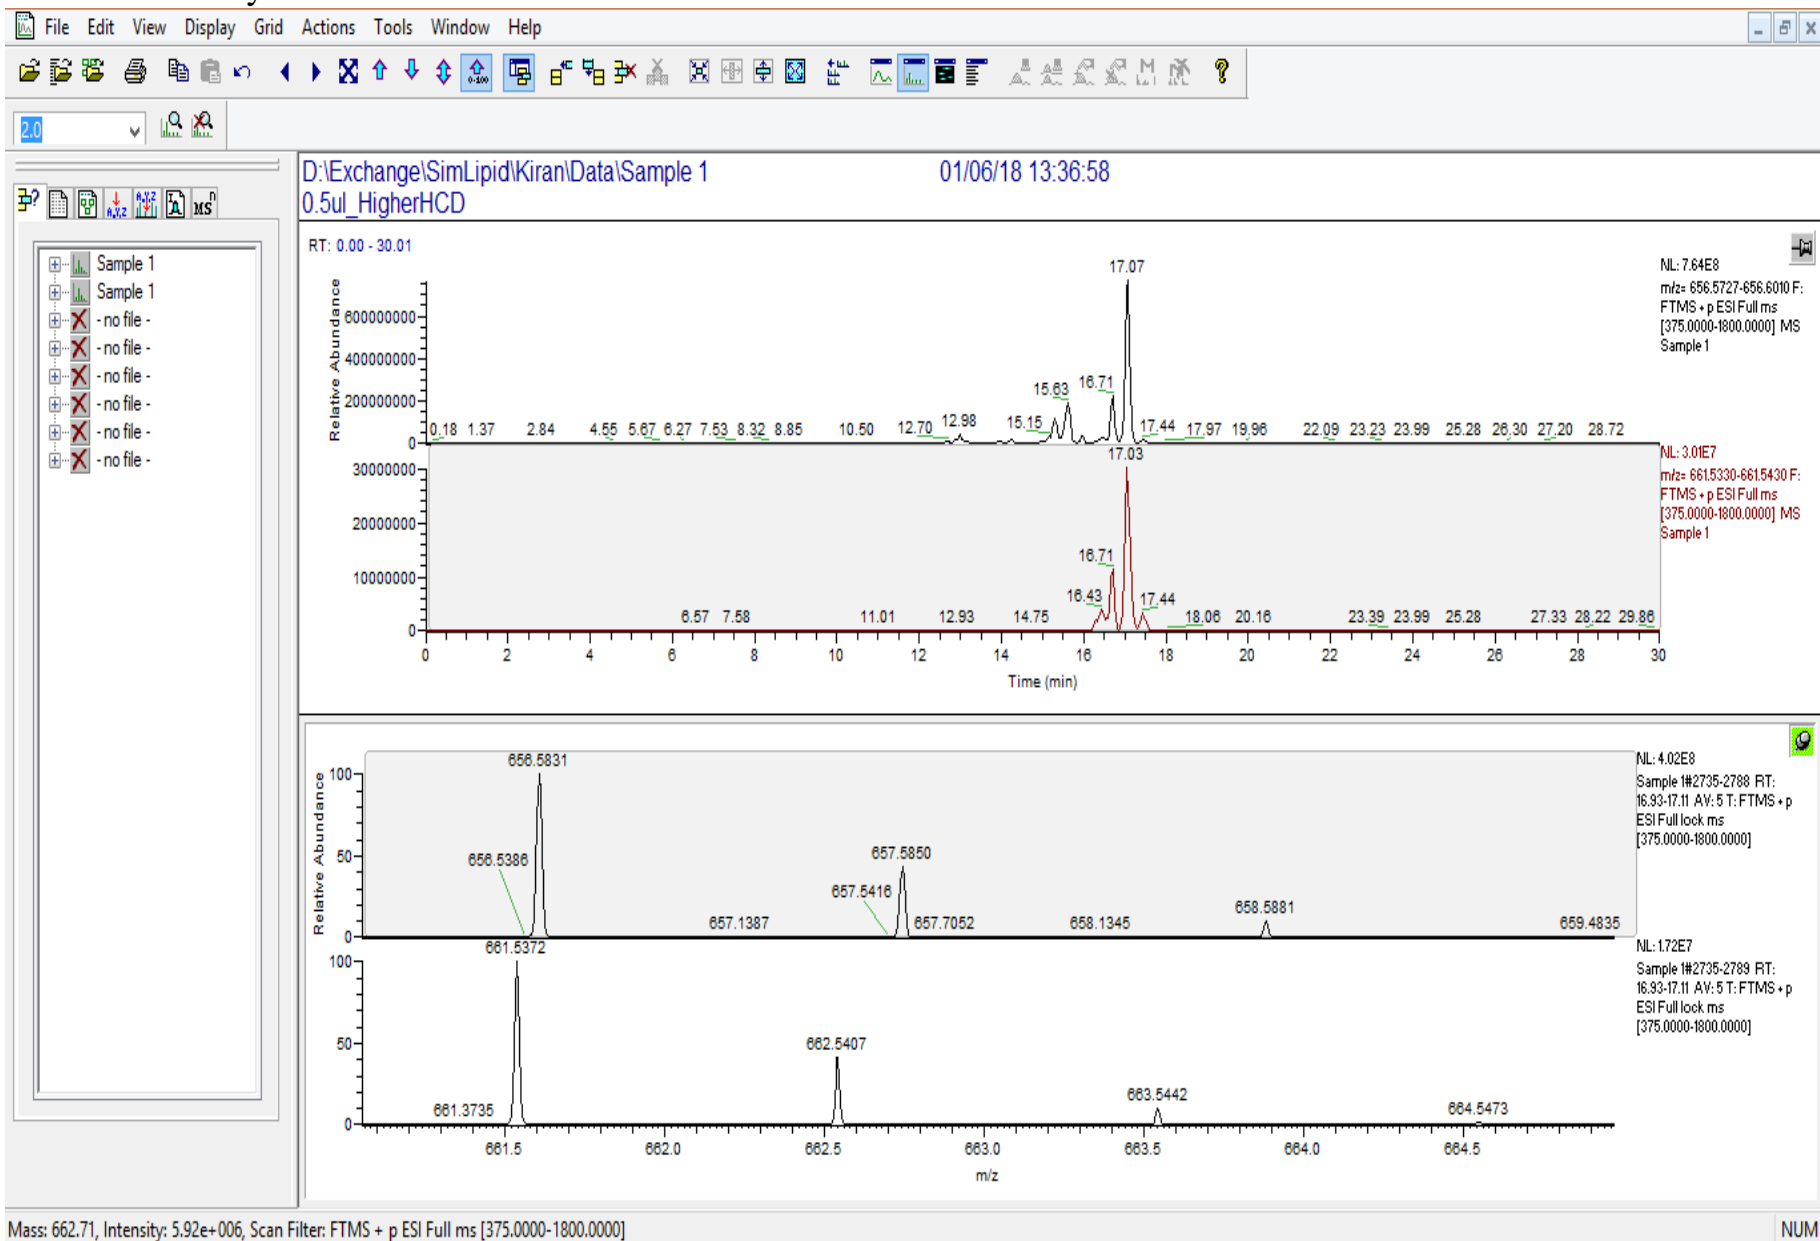

Figure S11(A): Coefficients of variation for 141 TG species

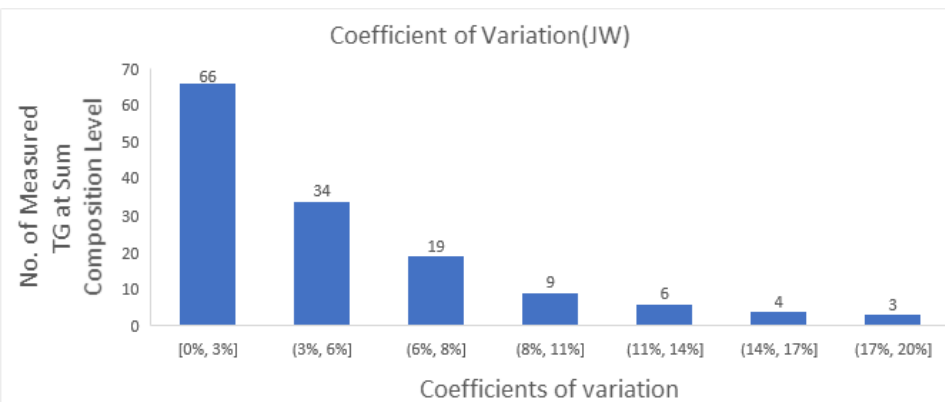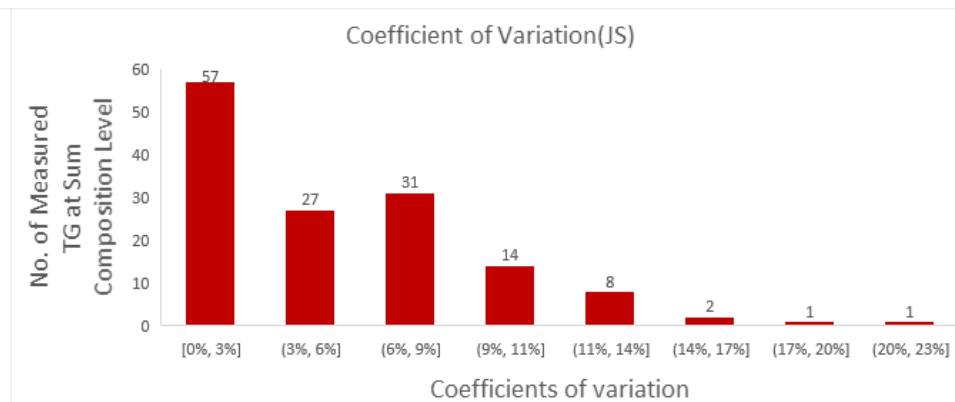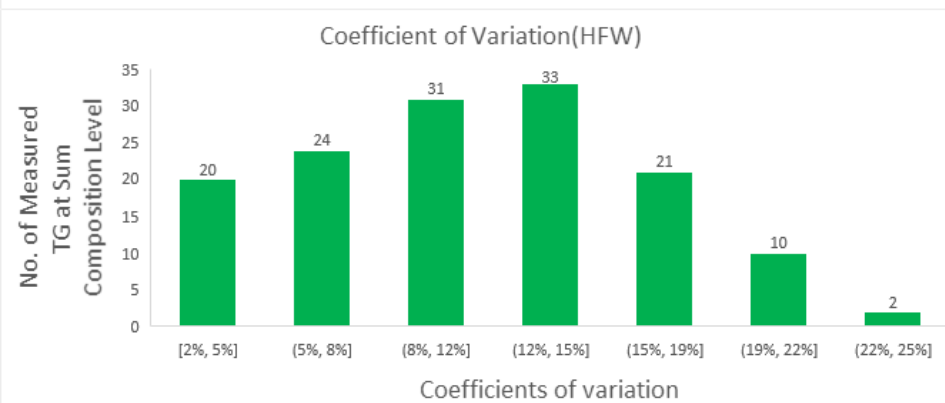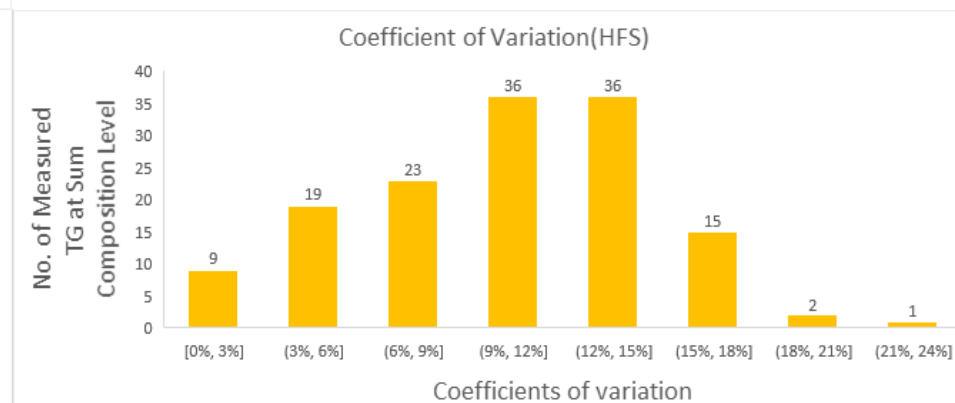

Figure S11(B): 54 other lipid species namely, DG, PC, PE, PI, PS, and Chol Der at sum composition level in JW, JS, HFS, and HFW.

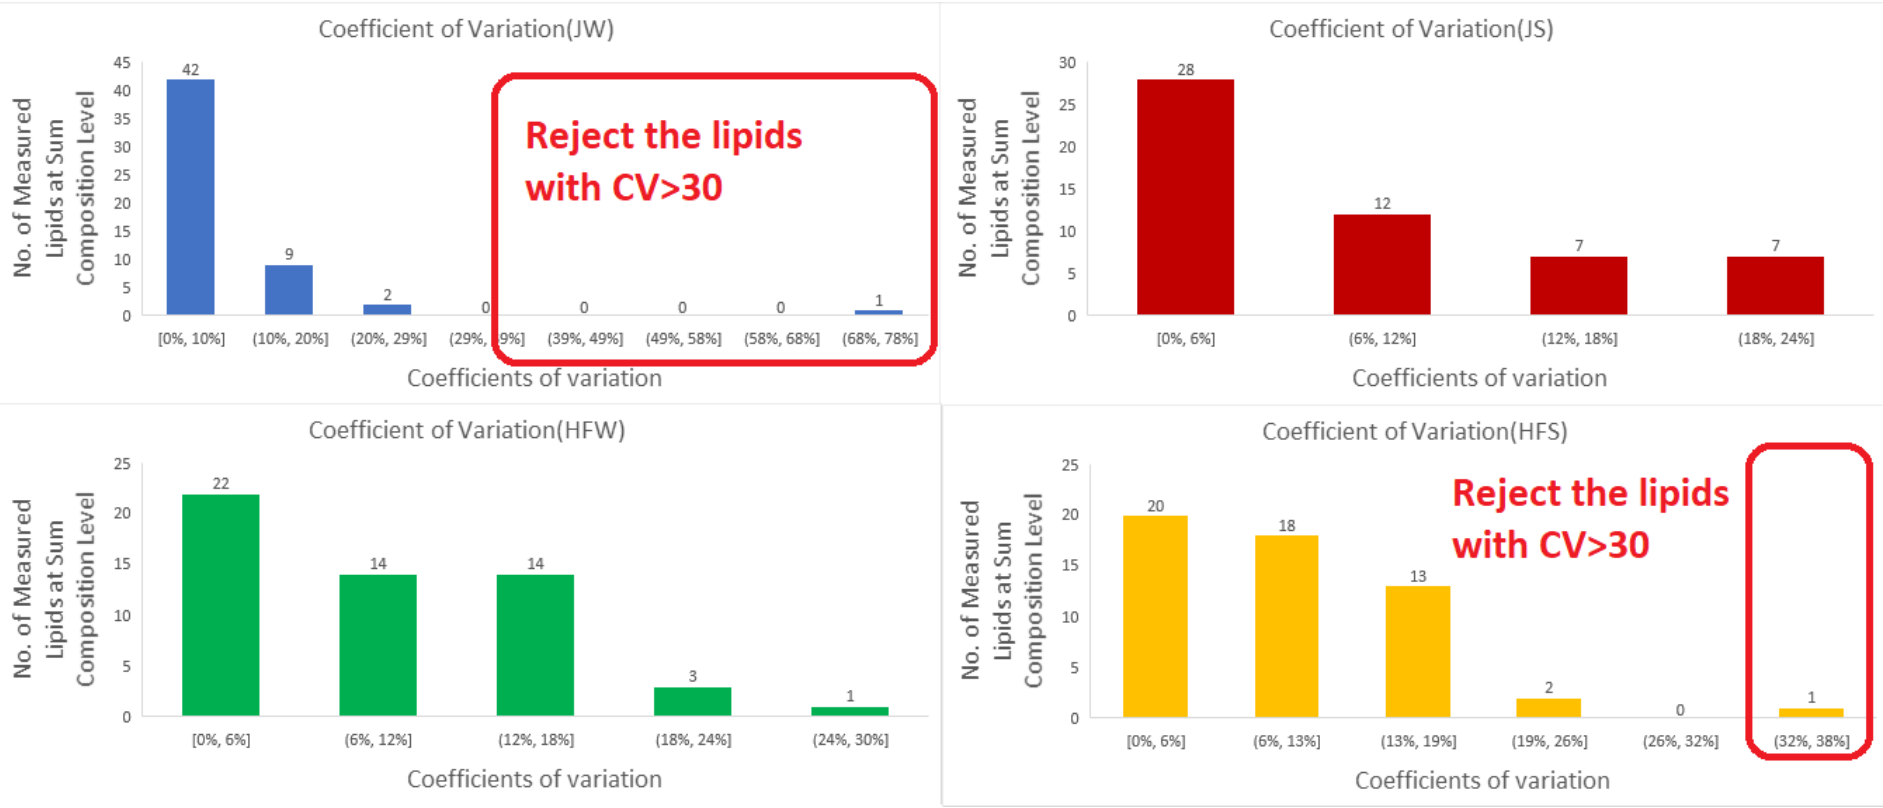



Figure S12(A) Variation of the 11 DG molecular groups between the breeds

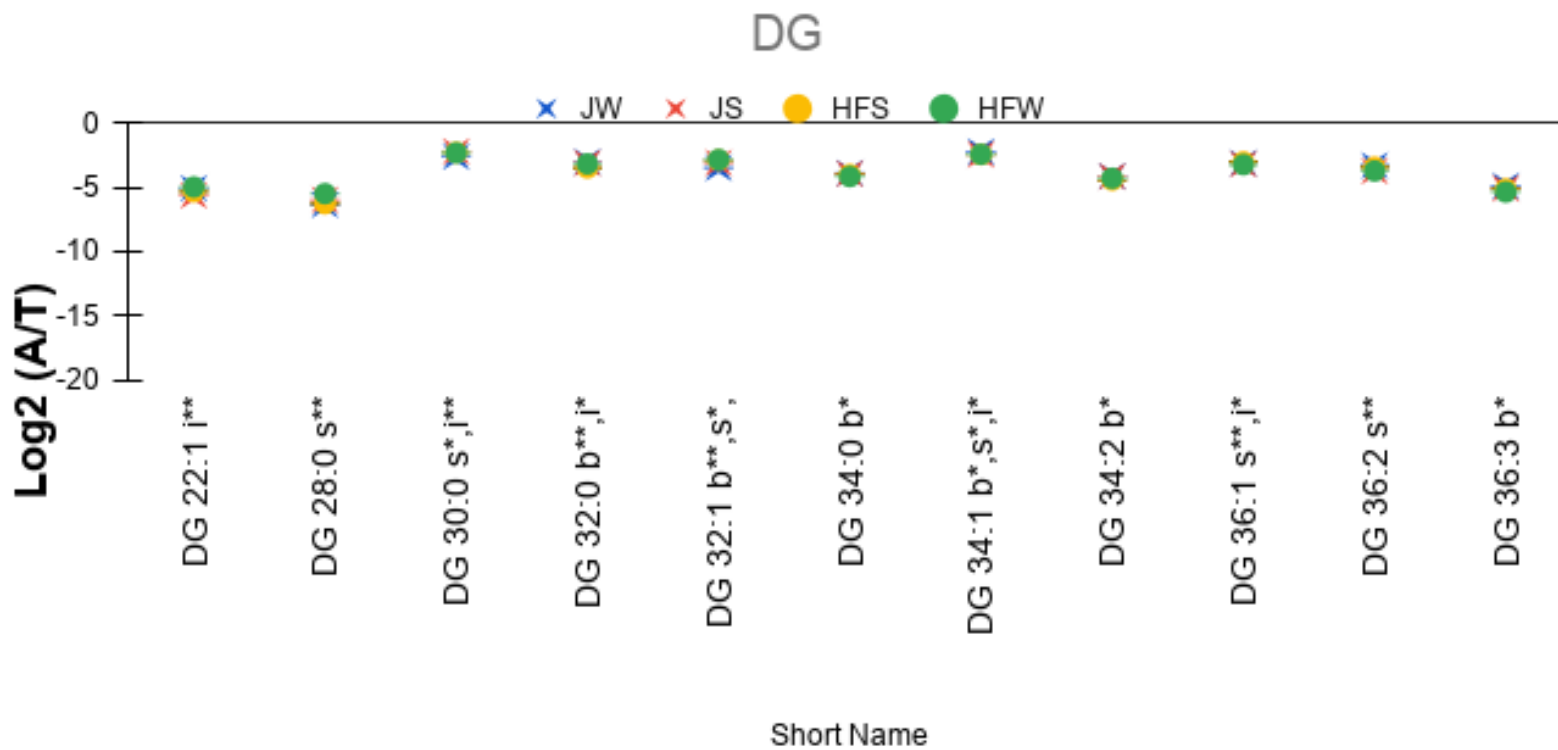

Figure S12(B) Variation of the 15 Glycerophospholipids –PC, PE, PS, and PI - between the breeds.

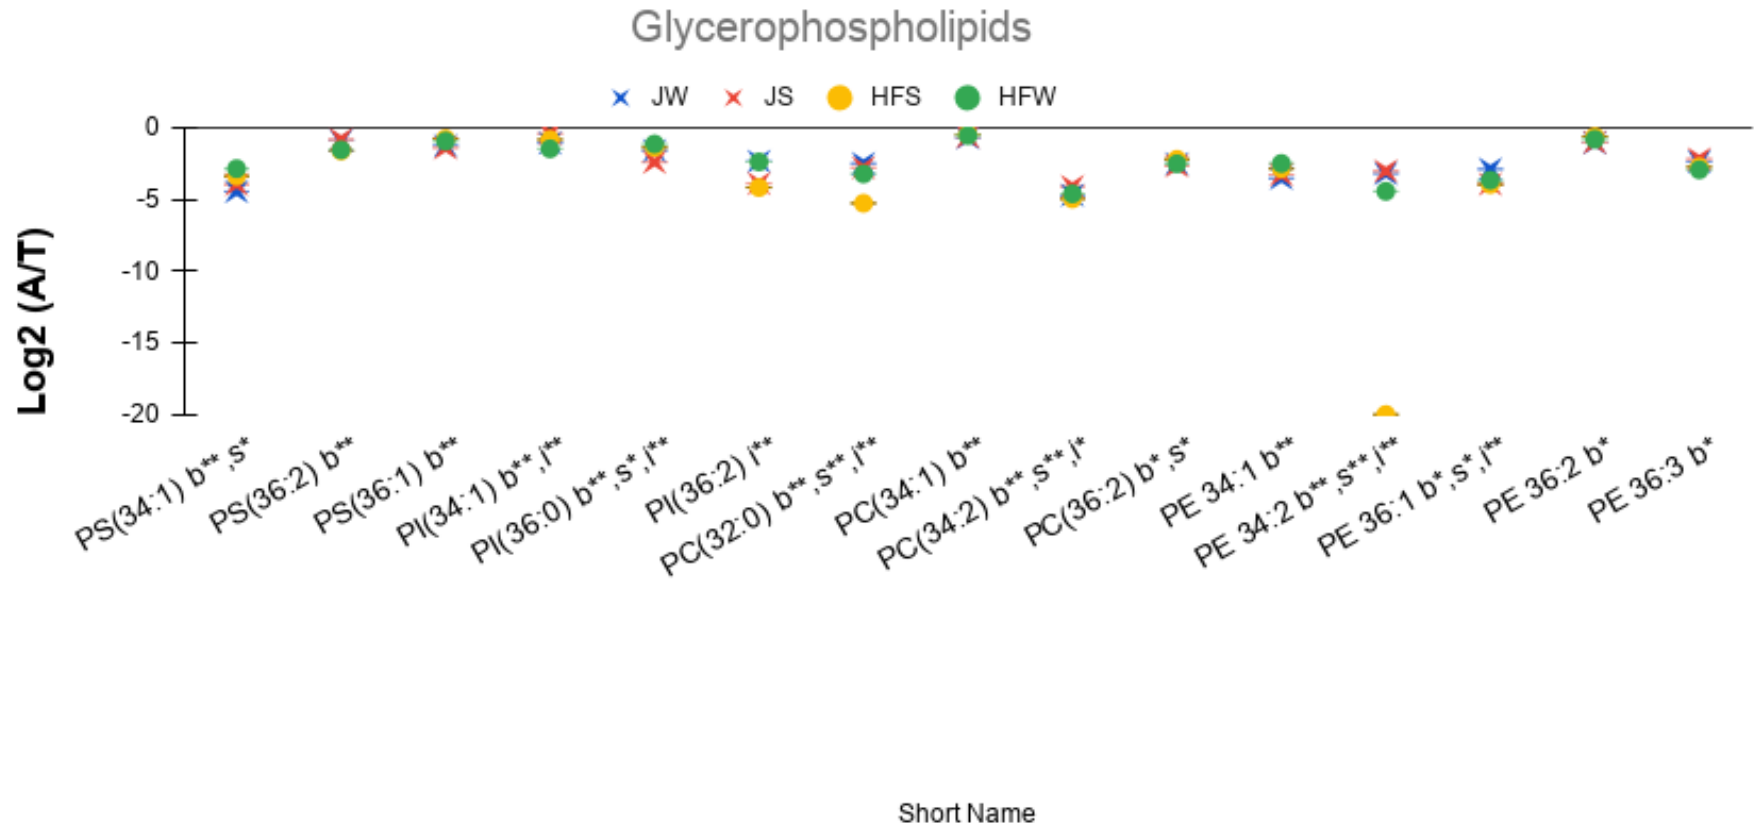

Figure S12(C): Variation of the 19 sphingomyelin lipid compositions between the breeds

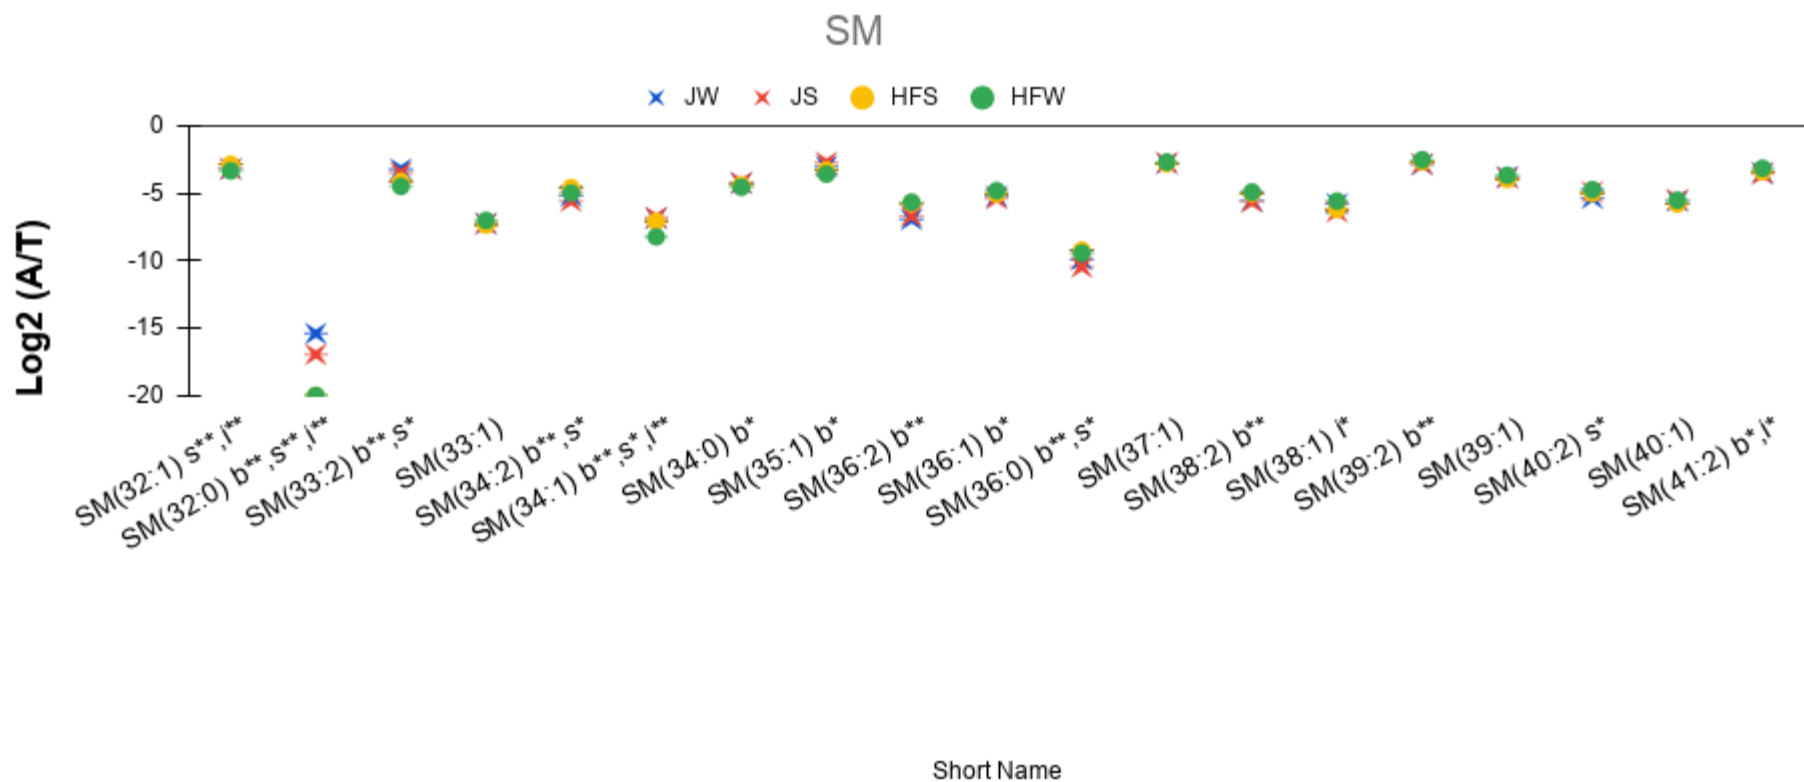

Figure S12(D): Variation of the 7 Sterols molecular groups between the breeds.

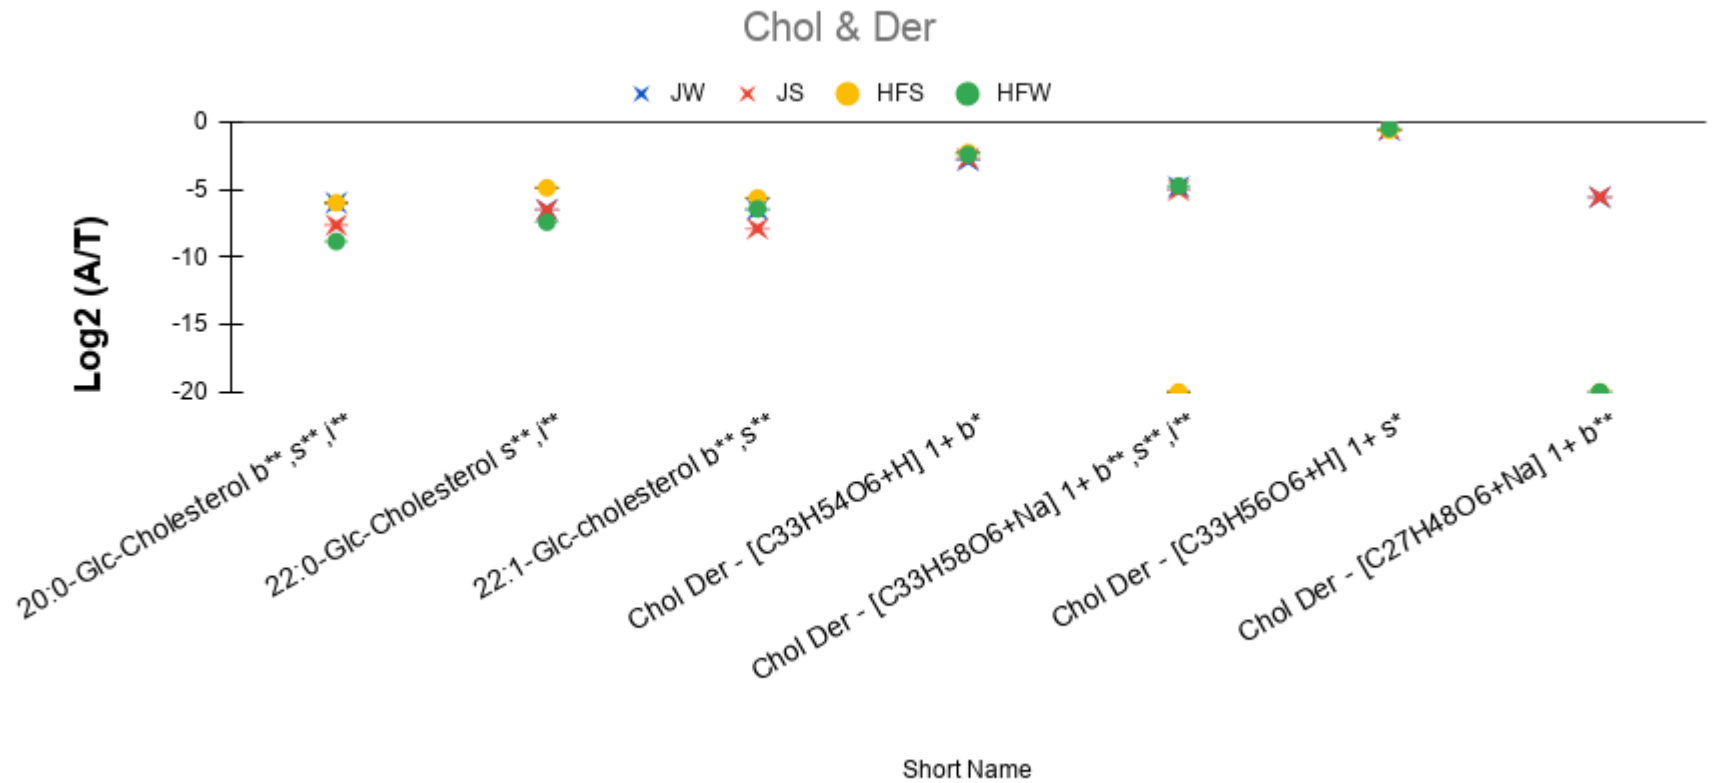

**Table S1:** Novel lipid species that are not yet reported by LIPIDMAPS database have been manually created based on the peaks observed in the MS/MS spectra.

1. TG 4:0\_4:0\_15:0
2. TG 4:0\_6:0\_14:0
3. TG 4:0\_8:0\_12:0
4. TG 4:0\_4:0\_16:0
5. TG 4:0\_10:0\_10:0
6. TG 2:0\_6:0\_16:0
7. TG 6:0\_8:0\_10:0
8. TG 2:0\_4:0\_18:0
9. TG 2:0\_4:0\_18:1
10. TG 4:0\_4:0\_16:1
11. TG 4:0\_6:0\_15:0
12. TG 4:0\_5:0\_16:0
13. TG 4:0\_10:0\_11:0
14. TG 6:0\_9:0\_10:0
15. TG 3:0\_9:0\_13:0
16. TG 4:0\_6:0\_16:0
17. TG 6:0\_10:0\_10:0
18. TG 4:0\_10:0\_12:0
19. TG 2:0\_6:0\_18:0
20. TG 4:0\_4:0\_18:1
21. TG 2:0\_12:0\_12:1
22. TG 4:0\_4:0\_18:2
23. TG 4:0\_6:0\_16:2
24. TG 4:0\_8:0\_15:0
25. TG 6:0\_6:0\_15:0
26. TG 4:0\_6:0\_17:0
27. TG 5:0\_7:0\_15:0
28. TG 5:0\_8:0\_14:0
29. TG 5:0\_10:0\_12:0
30. TG 4:0\_10:0\_14:0
31. TG 4:0\_8:0\_16:0
32. TG 6:0\_10:0\_12:0
33. TG 14:0\_8:0\_6:0
34. TG 4:0\_6:0\_18:0
35. TG 2:0\_10:0\_16:0
36. TG 4:0\_6:0\_18:1
37. TG 6:0\_6:0\_16:1
38. TG 4:0\_8:0\_16:1
39. TG 4:0\_10:1\_14:0

40. TG 4:0\_10:0\_14:1
41. TG 2:0\_6:0\_20:1
42. TG 4:0\_6:0\_18:2
43. TG 4:0\_8:0\_16:2
44. TG 4:0\_10:0\_15:0
45. TG 4:0\_8:0\_17:0
46. TG 5:0\_10:0\_14:0
47. TG 6:0\_11:0\_12:0
48. TG 7:0\_9:0\_13:0
49. TG 4:0\_12:0\_14:0
50. TG 10:0\_12:0\_8:0
51. TG 6:0\_10:0\_14:1
52. TG 4:0\_12:0\_14:1
53. TG 6:0\_12:0\_12:1
54. TG 8:0\_10:0\_12:1
55. TG 2:0\_14:0\_14:1
56. TG 4:0\_8:0\_18:2
57. TG 4:0\_12:0\_15:0
58. TG 6:0\_12:0\_13:0
59. TG 2:0\_13:0\_16:0
60. TG 8:0\_10:0\_13:0
61. TG 2:0\_14:0\_15:0
62. TG 4:0\_12:0\_16:0
63. TG 6:0\_10:0\_16:0
64. TG 10:0\_10:0\_12:0
65. TG 8:0\_10:0\_14:0
66. TG 2:0\_14:0\_16:0
67. TG 3:0\_14:0\_15:0
68. TG 4:0\_13:0\_15:0
69. TG 4:0\_12:0\_16:1
70. TG 10:0\_10:1\_12:0
71. TG 2:0\_14:1\_16:0
72. TG 2:0\_14:0\_16:1
73. TG 6:0\_12:1\_14:1
74. TG 6:0\_10:0\_16:2
75. TG 8:0\_10:1\_14:1
76. TG 10:0\_10:1\_12:1
77. TG 4:0\_12:0\_16:2
78. TG 4:0\_14:0\_15:0
79. TG 3:0\_13:0\_17:0

80. TG 8:0\_12:0\_13:0
81. TG 2:0\_14:0\_17:0
82. TG 10:0\_11:0\_12:0
83. TG 2:0\_13:0\_18:0
84. TG 4:0\_14:0\_16:0
85. TG 6:0\_12:0\_16:0
86. TG 8:0\_12:0\_14:0
87. TG 2:0\_14:0\_18:0
88. TG 10:0\_12:0\_12:0
89. TG 4:0\_14:1\_16:0
90. TG 6:0\_14:0\_14:1
91. TG 6:0\_12:0\_16:1
92. TG 10:0\_10:1\_14:0
93. TG 8:0\_12:0\_14:1
94. TG 2:0\_16:0\_16:1
95. TG 10:0\_12:0\_12:1
96. TG 2:0\_14:1\_18:0
97. TG 6:0\_12:1\_16:1
98. TG 4:0\_15:0\_16:0
99. TG 2:0\_16:0\_17:0
100. TG 2:0\_15:0\_18:0
101. TG 2:0\_14:0\_19:0
102. TG 4:0\_13:0\_18:1
103. TG 4:0\_14:0\_17:1
104. TG 5:0\_14:0\_16:1
105. TG 2:0\_15:0\_18:1
106. TG 5:0\_15:0\_15:1
107. TG 4:0\_15:1\_16:0
108. TG 7:0\_14:0\_14:1
109. TG 4:0\_16:0\_16:0
110. TG 6:0\_14:0\_16:0
111. TG 4:0\_14:0\_18:0
112. TG 10:0\_10:0\_16:0
113. TG 2:0\_16:0\_18:0
114. TG 10:0\_12:0\_14:0
115. TG 8:0\_10:0\_18:0
116. TG 4:0\_16:0\_16:1
117. TAG 6:0\_12:0\_18:1
118. TG 6:0\_14:0\_16:1
119. TG 2:0\_16:0\_18:1

120. TG 2:0\_16:1\_18:0  
121. TG 8:0\_10:0\_18:1  
122. TG 8:0\_12:0\_16:1  
123. TG 10:0\_12:0\_14:1  
124. TG 4:0\_14:0\_18:2  
125. TG 4:0\_14:1\_18:1  
126. TG 6:0\_14:1\_16:1  
127. TG 6:0\_14:0\_16:2  
128. TG 8:0\_12:0\_16:2  
129. TG 10:0\_10:1\_16:1  
130. TG 10:0\_12:1\_14:1  
131. TG 4:0\_14:0\_18:3  
132. TG 4:0\_16:1\_16:2  
133. TG 4:0\_16:0\_17:0  
134. TG 4:0\_15:0\_18:0  
135. TG 6:0\_15:0\_16:0  
136. TG 6:0\_14:0\_17:0  
137. TG 5:0\_16:0\_16:0  
138. TG 5:0\_14:0\_18:0  
139. TG 10:0\_12:0\_15:0  
140. TG 4:0\_15:0\_18:1  
141. TG 4:0\_16:0\_17:1  
142. TG 4:0\_14:0\_19:1  
143. TG 3:0\_16:0\_18:1  
144. TG 6:0\_14:0\_17:1  
145. TG 3:0\_17:0\_17:1  
146. TG 4:0\_15:0\_18:2  
147. TG 4:0\_15:1\_18:1  
148. TG 4:0\_16:1\_17:1  
149. TG 4:0\_16:0\_18:0  
150. TG 6:0\_16:0\_16:0  
151. TG 6:0\_14:0\_18:0  
152. TG 8:0\_14:0\_16:0  
153. TG 10:0\_12:0\_16:0  
154. TG 2:0\_18:0\_18:0  
155. TG 4:0\_16:0\_18:1  
156. TG 6:0\_14:0\_18:1  
157. TG 10:0\_12:0\_16:1  
158. TG 10:0\_10:0\_18:1  
159. TG 8:0\_12:0\_18:1



160. TG 4:0\_16:0\_18:2  
161. TG 4:0\_16:1\_18:1  
162. TG 6:0\_16:1\_16:1  
163. TG 6:0\_14:0\_18:2  
164. TG 6:0\_14:1\_18:1  
165. TG 4:0\_16:0\_18:3  
166. TG 4:0\_16:1\_18:2  
167. TG 4:0\_17:0\_18:0  
168. TG 4:0\_16:0\_19:0  
169. TG 6:0\_15:0\_18:0  
170. TG 10:0\_14:0\_15:0  
171. TG 4:0\_17:0\_18:1  
172. TG 4:0\_16:0\_19:1  
173. TG 6:0\_15:0\_18:1  
174. TG 4:0\_17:1\_18:1  
175. TG 6:0\_15:0\_18:2  
176. TG 4:0\_16:1\_19:1  
177. TG 5:0\_16:0\_18:2  
178. TG 6:0\_16:0\_18:0  
179. TG 10:0\_14:0\_16:0  
180. TG 8:0\_16:0\_16:0  
181. TG 4:0\_18:0\_18:0  
182. TG 10:0\_12:0\_18:0  
183. TG 8:0\_14:0\_18:0  
184. TG 4:0\_16:0\_20:0  
185. TG 4:0\_14:0\_22:0  
186. TG 4:0\_18:0\_18:1  
187. TG 6:0\_16:0\_18:1  
188. TG 8:0\_14:0\_18:1  
189. TG 10:0\_14:0\_16:1  
190. TG 10:0\_12:0\_18:1  
191. TG 4:0\_18:1\_18:1  
192. TG 6:0\_16:1\_18:1  
193. TG 6:0\_16:0\_18:2  
194. TG 8:0\_14:1\_18:1  
195. TG 4:0\_18:1\_18:2  
196. TG 6:0\_16:1\_18:2  
197. TG 4:0\_16:0\_20:4  
198. TG 4:0\_18:1\_18:3  
199. TAG 6:0\_17:0\_18:0

200. TG 10:0\_15:0\_16:0  
201. TG 4:0\_16:0\_21:0  
202. TG 11:0\_14:0\_16:0  
203. TG 11:0\_13:0\_17:0  
204. TG 6:0\_14:0\_21:0  
205. TG 9:0\_14:0\_18:0  
206. TG 6:0\_17:0\_18:1  
207. TG 8:0\_15:0\_18:1  
208. TG 4:0\_18:0\_19:1  
209. TG 5:0\_18:0\_18:1  
210. TG 4:0\_18:1\_19:1  
211. TG 6:0\_17:1\_18:1  
212. TG 6:0\_17:0\_18:2  
213. TG 5:0\_18:0\_18:2  
214. TG 8:0\_18:0\_16:0  
215. TG 10:0\_14:0\_18:0  
216. TG 6:0\_18:0\_18:0  
217. TG 4:0\_18:0\_20:0  
218. TG 6:0\_18:0\_18:1  
219. TG 4:0\_16:0\_22:1  
220. TG 6:0\_18:1\_18:1  
221. TG 8:0\_16:0\_18:2  
222. TG 8:0\_14:0\_20:2  
223. TG 6:0\_18:1\_18:2  
224. TG 4:0\_18:1\_20:2  
225. TG 4:0\_18:0\_20:3  
226. TG 6:0\_18:1\_18:3  
227. TG 6:0\_18:2\_18:2  
228. TG 6:0\_16:0\_20:4  
229. TG 4:0\_18:1\_20:4  
230. TG 4:0\_16:0\_22:5  
231. TG 10:1\_15:0\_18:1  
232. TG 10:1\_16:0\_17:1  
233. TG 10:1\_16:0\_18:0  
234. TG 8:0\_18:1\_18:2  
235. TG 10:0\_16:1\_18:2  
236. TG 10:0\_16:0\_18:3  
237. TAG 10:0\_14:0\_20:3  
238. TAG 10:0\_17:1\_18:1  
239. TAG 10:0\_18:0\_18:1

240. TG 10:0\_18:1\_18:1  
241. TG 10:0\_18:1\_18:2  
242. TG 10:1\_18:0\_18:2  
243. TG 10:0\_18:1\_18:3  
244. TG 11:0\_18:1\_18:1  
245. TG 16:0\_16:0\_24:0  
246. TG 16:0\_18:1\_23:1  
247. TG 18:0\_18:1\_23:1  
248. TG 18:1\_18:1\_23:1  
249. TG 18:1\_18:1\_24:1  
250. TG 18:0\_18:1\_25:0  
251. TG 19:0\_19:1\_23:0  
252. TG 16:0\_19:1\_26:0  
253. TG 16:0\_18:0\_28:0  
254. TG 16:0\_16:0\_30:0  
255. TG 16:0\_18:1\_28:0  
256. TG 18:0\_18:1\_26:0  
257. TG 16:0\_20:1\_26:0  
258. TG 16:0\_22:1\_24:0  
259. TG 18:0\_18:2\_26:0  
260. TG 16:0\_18:2\_28:0  
261. TG 14:0\_16:0\_22:5

**Table S1: List of Lipid IDs across Breeds and Seasons**

A. Lipid IDs common between Jafarabadi Summer (JS) and Holstein Friesian Winter (HW)

|     |                   |
|-----|-------------------|
| 1.  | TG 10:0_12:0_12:1 |
| 2.  | TG 14:1_14:1_16:1 |
| 3.  | TG 12:0_12:0_21:0 |
| 4.  | TG 15:0_15:0_18:2 |
| 5.  | TG 14:0_16:0_20:1 |
| 6.  | TG 14:0_18:1_20:3 |
| 7.  | TG 14:0_16:0_22:4 |
| 8.  | TG 16:0_17:0_20:1 |
| 9.  | TG 15:0_18:0_20:1 |
| 10. | TG 16:0_17:1_20:1 |
| 11. | TG 16:0_16:0_22:4 |
| 12. | TG 16:1_18:0_22:0 |
| 13. | TG 16:1_20:0_20:0 |
| 14. | TG 16:1_18:1_22:1 |
| 15. | TG 16:1_20:1_20:1 |
| 16. | TG 14:0_21:0_22:1 |
| 17. | TG 17:1_18:0_22:1 |
| 18. | TG 17:1_19:1_21:0 |
| 19. | TG 18:0_20:1_22:1 |
| 20. | TG 16:1_22:0_22:1 |
| 21. | TG 16:0_22:1_22:1 |
| 22. | TG 18:1_20:1_22:1 |

B. Lipid IDs common between Jafarabadi Winter (JW) and Holstein Friesian Summer (HS)

|     |                   |
|-----|-------------------|
| 1.  | DG 4:0_18:1_0:0   |
| 2.  | TG 2:0_14:0_15:0  |
| 3.  | TG 4:0_12:0_16:2  |
| 4.  | TG 4:0_14:0_22:0  |
| 5.  | TG 6:0_16:1_18:2  |
| 6.  | TG 11:0_14:0_16:0 |
| 7.  | TG 11:0_13:0_17:0 |
| 8.  | TG 12:0_14:1_15:0 |
| 9.  | TG 12:0_13:0_16:1 |
| 10. | TG 8:0_14:0_20:2  |

|    |                   |
|----|-------------------|
| 11 | TG 4:0_16:0_22:5  |
| 12 | TG 12:0_14:1_17:0 |
| 13 | TG 14:0_14:0_15:1 |
| 14 | TG 10:0_14:0_20:3 |
| 15 | TG 12:0_16:1_17:1 |
| 16 | TG 14:1_15:0_16:1 |
| 17 | TG 14:1_14:1_17:0 |
| 18 | TG 12:0_14:0_20:1 |
| 19 | TG 12:0_16:0_18:3 |
| 20 | TG 10:0_18:1_18:3 |
| 21 | TG 13:0_18:1_18:1 |
| 22 | TG 13:0_18:0_18:2 |
| 23 | TG 15:1_16:1_18:0 |
| 24 | TG 15:0_16:0_18:3 |
| 25 | TG 12:0_18:0_20:0 |
| 26 | TG 12:0_16:0_22:0 |
| 27 | TG 15:0_15:0_20:0 |
| 28 | TG 15:0_17:2_18:2 |
| 29 | TG 14:0_14:0_22:4 |
| 30 | TG 14:0_15:0_22:0 |
| 31 | TG 15:1_18:0_18:0 |
| 32 | TG 16:1_17:0_18:2 |
| 33 | TG 14:0_16:0_22:5 |
| 34 | TG 16:1_18:2_18:2 |
| 35 | TG 14:0_18:1_21:0 |
| 36 | TG 15:0_16:0_22:1 |
| 37 | TG 14:0_19:1_20:0 |
| 38 | TG 14:0_18:0_22:1 |
| 39 | TG 15:0_18:0_22:1 |
| 40 | TG 16:0_18:1_22:2 |
| 41 | TG 18:0_18:3_20:1 |
| 42 | TG 18:2_18:2_20:1 |
| 43 | TG 17:0_20:0_20:0 |
| 44 | TG 16:0_19:0_22:1 |
| 45 | TG 18:1_19:1_20:1 |
| 46 | TG 19:1_19:1_19:1 |
| 47 | TG 18:1_19:1_22:0 |
| 48 | TG 16:0_22:0_22:0 |
| 49 | TG 19:1_19:1_22:1 |
| 50 | TG 20:0_20:0_22:1 |
| 51 | TG 20:0_20:1_22:0 |

C. Lipid IDs in Jafarabadi Summer (JS) and Holstein Friesian Summer (HS)

|    |                   |
|----|-------------------|
| 1. | TG 13:0_15:0_18:1 |
| 2. | TG 13:0_16:0_18:0 |
| 3. | TG 13:0_17:0_17:0 |
| 4. | TG 15:0_17:1_19:1 |
| 5. | TG 14:0_18:0_20:4 |
| 6. | TG 16:0_18:0_18:4 |
| 7. | TG 17:2_18:0_18:1 |
| 8. | TG 17:0_17:2_19:1 |
| 9. | TG 14:0_20:0_21:0 |
| 10 | TG 16:0_20:0_20:2 |
| 11 | TG 18:0_18:0_20:2 |
| 12 | SM d43:1          |

D. Lipid IDs in Holstein Friesian Summer (HS) and Jafarabadi Winter (JW)

|    |                    |
|----|--------------------|
| 1. | TG 10:0_12:1_14:1  |
| 2. | TG 12:0_12:0_20:1  |
| 3. | TG 13:0_13:0_19:0  |
| 4. | TG 14:1_16:0_17:0  |
| 5. | TG 14:0_15:1_18:1  |
| 6. | TG 15:1_15:1_17:0  |
| 7. | TG 14:1_18:0_18:1  |
| 8. | TG 15:0_16:0_20:3  |
| 9. | TG 14:0_20:0_20:0  |
| 10 | TG 16:0_18:1_20:5  |
| 11 | TG 14:0_19:0_22:0  |
| 12 | TG 17:1_18:0_20:0  |
| 13 | TG 14:0_19:0_22:1  |
| 14 | TG 16:1_20:1_20:2  |
| 15 | TG 16:1_18:1_22:2  |
| 16 | TG 18:0_18:0_20:4  |
| 17 | TG 16:0_18:0_22:4  |
| 18 | TG 16:1_20:1_22:1  |
| 19 | TAG 16:0_20:1_22:2 |

E. Lipid IDs common in all four samples

|     |                  |
|-----|------------------|
| 1.  | DG 14:0_16:0_0:0 |
| 2.  | DG 12:0_18:0_0:0 |
| 3.  | DG 16:0_16:0_0:0 |
| 4.  | DG 14:0_18:0_0:0 |
| 5.  | DG 14:0_18:1_0:0 |
| 6.  | DG 16:0_16:1_0:0 |
| 7.  | DG 18:0_16:0_0:0 |
| 8.  | DG 18:1_16:0_0:0 |
| 9.  | DG 18:0_18:1_0:0 |
| 10. | DG 18:1_18:1_0:0 |
| 11. | TG 4:0_6:0_14:0  |
| 12. | TG 4:0_8:0_12:0  |
| 13. | TG 4:0_4:0_16:0  |
| 14. | TG 4:0_10:0_10:0 |
| 15. | TG 2:0_6:0_16:0  |
| 16. | TG 6:0_8:0_10:0  |
| 17. | TG 4:0_6:0_16:0  |
| 18. | TG 6:0_10:0_10:0 |
| 19. | TG 4:0_10:0_12:0 |
| 20. | TG 2:0_6:0_18:0  |
| 21. | TG 4:0_4:0_18:1  |
| 22. | TG 4:0_10:0_14:0 |
| 23. | TG 4:0_8:0_16:0  |
| 24. | TG 6:0_10:0_12:0 |
| 25. | TG 14:0_8:0_6:0  |
| 26. | TG 4:0_6:0_18:0  |
| 27. | TG 2:0_10:0_16:0 |
| 28. | TG 4:0_6:0_18:1  |
| 29. | TG 6:0_6:0_16:1  |
| 30. | TG 4:0_8:0_16:1  |
| 31. | TG 4:0_10:1_14:0 |
| 32. | TG 4:0_10:0_14:1 |
| 33. | TG 4:0_10:0_15:0 |
| 34. | TG 5:0_10:0_14:0 |
| 35. | TG 6:0_11:0_12:0 |
| 36. | TG 4:0_12:0_14:0 |
| 37. | TG 10:0_12:0_8:0 |
| 38. | TG 6:0_10:0_14:1 |
| 39. | TG 4:0_12:0_14:1 |
| 40. | TG 6:0_12:0_12:1 |
| 41. | TG 8:0_10:0_12:1 |

|     |                   |
|-----|-------------------|
| 42. | TG 2:0_14:0_14:1  |
| 43. | TG 4:0_12:0_15:0  |
| 44. | TG 6:0_12:0_13:0  |
| 45. | TG 8:0_10:0_13:0  |
| 46. | TG 4:0_12:0_16:0  |
| 47. | TG 6:0_10:0_16:0  |
| 48. | TG 10:0_10:0_12:0 |
| 49. | TG 8:0_10:0_14:0  |
| 50. | TG 2:0_14:0_16:0  |
| 51. | TG 3:0_14:0_15:0  |
| 52. | TG 4:0_13:0_15:0  |
| 53. | TG 4:0_12:0_16:1  |
| 54. | TG 10:0_10:1_12:0 |
| 55. | TG 2:0_14:1_16:0  |
| 56. | TG 2:0_14:0_16:1  |
| 57. | TG 4:0_14:0_15:0  |
| 58. | TG 3:0_13:0_17:0  |
| 59. | TG 8:0_12:0_13:0  |
| 60. | TG 2:0_14:0_17:0  |
| 61. | TG 10:0_11:0_12:0 |
| 62. | TG 2:0_13:0_18:0  |
| 63. | TG 4:0_14:0_16:0  |
| 64. | TG 6:0_12:0_16:0  |
| 65. | TG 8:0_12:0_14:0  |
| 66. | TG 2:0_14:0_18:0  |
| 67. | TG 10:0_12:0_12:0 |
| 68. | TG 4:0_14:1_16:0  |
| 69. | TG 6:0_14:0_14:1  |
| 70. | TG 6:0_12:0_16:1  |
| 71. | TG 10:0_10:1_14:0 |
| 72. | TG 8:0_12:0_14:1  |
| 73. | TG 2:0_16:0_16:1  |
| 74. | TG 2:0_14:1_18:0  |
| 75. | TG 6:0_12:1_16:1  |
| 76. | TG 4:0_15:0_16:0  |
| 77. | TG 4:0_13:0_18:1  |
| 78. | TG 4:0_14:0_17:1  |
| 79. | TG 5:0_14:0_16:1  |
| 80. | TG 2:0_15:0_18:1  |
| 81. | TG 5:0_15:0_15:1  |
| 82. | TG 6:0_14:0_15:1  |
| 83. | TG 4:0_16:0_16:0  |
| 84. | TG 6:0_14:0_16:0  |
| 85. | TG 4:0_14:0_18:0  |



|      |                   |
|------|-------------------|
| 86.  | TG 10:0_10:0_16:0 |
| 87.  | TG 2:0_16:0_18:0  |
| 88.  | TG 10:0_12:0_14:0 |
| 89.  | TG 8:0_10:0_18:0  |
| 90.  | TG 4:0_16:0_16:1  |
| 91.  | TG 6:0_12:0_18:1  |
| 92.  | TG 6:0_14:0_16:1  |
| 93.  | TG 2:0_16:0_18:1  |
| 94.  | TG 2:0_16:1_18:0  |
| 95.  | TG 8:0_10:0_18:1  |
| 96.  | TG 8:0_12:0_16:1  |
| 97.  | TG 10:0_12:0_14:1 |
| 98.  | TG 4:0_14:0_18:2  |
| 99.  | TG 4:0_14:1_18:1  |
| 100. | TG 6:0_14:1_16:1  |
| 101. | TG 6:0_14:0_16:2  |
| 102. | TG 4:0_14:0_18:3  |
| 103. | TG 4:0_16:0_17:0  |
| 104. | TG 4:0_15:0_18:0  |
| 105. | TG 6:0_15:0_16:0  |
| 106. | TG 6:0_14:0_17:0  |
| 107. | TG 5:0_16:0_16:0  |
| 108. | TG 5:0_14:0_18:0  |
| 109. | TG 10:0_12:0_15:0 |
| 110. | TG 12:0_12:0_13:0 |
| 111. | TG 4:0_15:0_18:1  |
| 112. | TG 4:0_16:0_17:1  |
| 113. | TG 4:0_14:0_19:1  |
| 114. | TG 6:0_14:0_17:1  |
| 115. | TG 4:0_15:0_18:2  |
| 116. | TG 4:0_15:1_18:1  |
| 117. | TG 4:0_16:1_17:1  |
| 118. | TG 4:0_16:0_18:0  |
| 119. | TG 6:0_16:0_16:0  |
| 120. | TG 6:0_14:0_18:0  |
| 121. | TG 8:0_14:0_16:0  |
| 122. | TG 10:0_12:0_16:0 |
| 123. | TG 12:0_12:0_14:0 |
| 124. | TG 4:0_16:0_18:1  |
| 125. | TG 6:0_14:0_18:1  |
| 126. | TG 10:0_12:0_16:1 |
| 127. | TG 10:0_10:0_18:1 |
| 128. | TG 12:0_12:0_14:1 |
| 129. | TG 8:0_12:0_18:1  |

|      |                   |
|------|-------------------|
| 130. | TG 4:0_16:0_18:2  |
| 131. | TG 4:0_16:1_18:1  |
| 132. | TG 6:0_16:1_16:1  |
| 133. | TG 6:0_14:0_18:2  |
| 134. | TG 6:0_14:1_18:1  |
| 135. | TG 4:0_16:0_18:3  |
| 136. | TG 4:0_16:1_18:2  |
| 137. | TG 4:0_17:0_18:0  |
| 138. | TG 4:0_16:0_19:0  |
| 139. | TG 6:0_15:0_18:0  |
| 140. | TG 10:0_14:0_15:0 |
| 141. | TG 12:0_12:0_15:0 |
| 142. | TG 12:0_13:0_14:0 |
| 143. | TG 13:0_13:0_13:0 |
| 144. | TG 4:0_17:0_18:1  |
| 145. | TG 4:0_16:0_19:1  |
| 146. | TG 6:0_15:0_18:1  |
| 147. | TG 4:0_17:1_18:1  |
| 148. | TG 6:0_15:0_18:2  |
| 149. | TG 4:0_16:1_19:1  |
| 150. | TG 5:0_16:0_18:2  |
| 151. | TG 6:0_16:0_18:0  |
| 152. | TG 10:0_14:0_16:0 |
| 153. | TG 8:0_16:0_16:0  |
| 154. | TG 4:0_18:0_18:0  |
| 155. | TG 12:0_12:0_16:0 |
| 156. | TG 10:0_12:0_18:0 |
| 157. | TG 8:0_14:0_18:0  |
| 158. | TG 12:0_14:0_14:0 |
| 159. | TG 13:0_13:0_14:0 |
| 160. | TG 4:0_16:0_20:0  |
| 161. | TG 4:0_18:0_18:1  |
| 162. | TG 6:0_16:0_18:1  |
| 163. | TG 8:0_14:0_18:1  |
| 164. | TG 10:0_14:0_16:1 |
| 165. | TG 10:0_12:0_18:1 |
| 166. | TG 12:0_12:0_16:1 |
| 167. | TG 4:0_18:1_18:1  |
| 168. | TG 6:0_16:1_18:1  |
| 169. | TG 6:0_16:0_18:2  |
| 170. | TG 4:0_18:1_18:2  |
| 171. | TG 4:0_18:1_18:3  |
| 172. | TG 6:0_17:0_18:0  |
| 173. | TG 10:0_15:0_16:0 |

|      |                   |
|------|-------------------|
| 174. | TG 12:0_14:0_15:0 |
| 175. | TG 12:0_13:0_16:0 |
| 176. | TG 13:0_13:0_15:0 |
| 177. | TG 12:0_12:0_17:0 |
| 178. | TG 13:0_14:0_14:0 |
| 179. | TG 6:0_17:0_18:1  |
| 180. | TG 8:0_15:0_18:1  |
| 181. | TG 4:0_18:0_19:1  |
| 182. | TG 5:0_18:0_18:1  |
| 183. | TG 4:0_18:1_19:1  |
| 184. | TG 6:0_17:1_18:1  |
| 185. | TG 6:0_17:0_18:2  |
| 186. | TG 12:0_14:0_16:0 |
| 187. | TG 8:0_18:0_16:0  |
| 188. | TG 10:0_14:0_18:0 |
| 189. | TG 6:0_18:0_18:0  |
| 190. | TG 12:0_12:0_18:0 |
| 191. | TG 14:0_14:0_14:0 |
| 192. | TG 12:0_13:0_17:0 |
| 193. | TG 12:0_15:0_15:0 |
| 194. | TG 13:0_13:0_16:0 |
| 195. | TG 6:0_18:0_18:1  |
| 196. | TG 12:0_12:0_18:1 |
| 197. | TG 12:0_14:0_16:1 |
| 198. | TG 4:0_16:0_22:1  |
| 199. | TG 6:0_18:1_18:1  |
| 200. | TG 8:0_16:0_18:2  |
| 201. | TG 6:0_18:1_18:2  |
| 202. | TG 4:0_18:1_20:2  |
| 203. | TG 12:0_15:0_16:0 |
| 204. | TG 13:0_14:0_16:0 |
| 205. | TG 14:0_14:0_15:0 |
| 206. | TG 12:0_14:0_17:0 |
| 207. | TG 12:0_15:0_16:1 |
| 208. | TG 12:0_14:0_17:1 |
| 209. | TG 12:0_13:0_18:1 |
| 210. | TG 12:0_12:0_19:1 |
| 211. | TG 13:0_14:0_16:1 |
| 212. | TG 14:0_14:0_16:0 |
| 213. | TG 12:0_16:0_16:0 |
| 214. | TG 12:0_14:0_18:0 |
| 215. | TG 14:0_15:0_15:0 |
| 216. | TG 13:0_15:0_16:0 |
| 217. | TG 12:0_14:0_18:1 |

|      |                   |
|------|-------------------|
| 218. | TG 12:0_16:0_16:1 |
| 219. | TG 14:0_14:1_16:0 |
| 220. | TG 12:0_14:1_18:0 |
| 221. | TG 10:1_16:0_18:0 |
| 222. | TG 14:0_14:0_16:1 |
| 223. | TG 12:0_16:1_16:1 |
| 224. | TG 8:0_18:1_18:2  |
| 225. | TG 14:0_15:0_16:0 |
| 226. | TG 12:0_16:0_17:0 |
| 227. | TG 13:0_16:0_16:0 |
| 228. | TG 14:0_14:0_17:0 |
| 229. | TG 12:0_15:0_18:0 |
| 230. | TG 13:0_14:0_18:0 |
| 231. | TG 13:0_15:0_17:0 |
| 232. | TG 15:0_15:0_15:0 |
| 233. | TG 12:0_15:0_18:1 |
| 234. | TG 14:1_15:0_16:0 |
| 235. | TG 13:0_14:0_18:1 |
| 236. | TG 14:0_15:0_16:1 |
| 237. | TG 12:0_16:0_17:1 |
| 238. | TG 12:0_14:0_19:1 |
| 239. | TG 14:0_14:1_17:0 |
| 240. | TG 12:0_16:1_17:0 |
| 241. | TG 13:0_15:0_17:1 |
| 242. | TG 14:0_14:0_17:1 |
| 243. | TG 14:0_16:0_16:0 |
| 244. | TG 12:0_16:0_18:0 |
| 245. | TG 15:0_15:0_16:0 |
| 246. | TG 14:0_14:0_18:0 |
| 247. | TG 14:0_15:0_17:0 |
| 248. | TG 12:0_16:0_18:1 |
| 249. | TG 14:0_14:0_18:1 |
| 250. | TG 14:0_16:0_16:1 |
| 251. | TG 14:1_16:0_16:0 |
| 252. | TG 10:0_18:0_18:1 |
| 253. | TG 12:0_16:1_18:0 |
| 254. | TG 14:0_14:1_18:0 |
| 255. | TG 14:0_14:1_18:1 |
| 256. | TG 12:0_16:0_18:2 |
| 257. | TG 10:0_18:1_18:1 |
| 258. | TG 14:0_14:0_18:2 |
| 259. | TG 12:0_16:1_18:1 |
| 260. | TG 14:1_16:0_16:1 |
| 261. | TG 14:0_16:1_16:1 |

|      |                   |
|------|-------------------|
| 262. | TG 10:0_18:1_18:2 |
| 263. | TG 14:1_14:1_18:1 |
| 264. | TG 15:0_16:0_16:0 |
| 265. | TG 14:0_16:0_17:0 |
| 266. | TG 14:0_15:0_18:0 |
| 267. | TG 15:0_15:0_17:0 |
| 268. | TG 14:0_15:0_18:1 |
| 269. | TG 13:0_16:0_18:1 |
| 270. | TG 12:0_17:0_18:1 |
| 271. | TG 14:0_16:0_17:1 |
| 272. | TG 15:0_16:0_16:1 |
| 273. | TG 14:0_16:1_17:0 |
| 274. | TG 15:0_15:0_17:1 |
| 275. | TG 13:0_15:0_19:1 |
| 276. | TG 14:0_14:0_19:1 |
| 277. | TG 12:0_16:0_19:1 |
| 278. | TG 13:0_17:0_17:1 |
| 279. | TG 14:1_15:0_18:1 |
| 280. | TG 14:0_15:0_18:2 |
| 281. | TG 14:0_14:1_19:1 |
| 282. | TG 15:0_16:1_16:1 |
| 283. | TG 14:0_16:1_17:1 |
| 284. | TG 14:0_16:0_18:0 |
| 285. | TG 16:0_16:0_16:0 |
| 286. | TG 15:0_16:0_17:0 |
| 287. | TG 15:0_15:0_18:0 |
| 288. | TG 14:0_17:0_17:0 |
| 289. | TG 14:0_16:0_18:1 |
| 290. | TG 16:0_16:0_16:1 |
| 291. | TG 14:0_16:1_18:0 |
| 292. | TG 14:0_16:0_18:2 |
| 293. | TG 14:0_16:1_18:1 |
| 294. | TG 16:0_16:1_16:1 |
| 295. | TG 12:0_18:1_18:1 |
| 296. | TG 12:0_18:1_18:2 |
| 297. | TG 14:0_16:1_18:2 |
| 298. | TG 14:1_16:1_18:1 |
| 299. | TG 14:1_16:0_18:2 |
| 300. | TG 16:1_16:1_16:1 |
| 301. | TG 15:0_16:0_18:0 |
| 302. | TG 16:0_16:0_17:0 |
| 303. | TG 14:0_17:0_18:0 |
| 304. | TG 15:0_17:0_17:0 |
| 305. | TG 15:0_16:0_18:1 |

|      |                   |
|------|-------------------|
| 306. | TG 14:0_17:0_18:1 |
| 307. | TG 16:0_16:1_17:0 |
| 308. | TG 16:0_16:0_17:1 |
| 309. | TG 15:0_17:0_17:1 |
| 310. | TG 15:0_16:1_18:0 |
| 311. | TG 14:0_17:1_18:0 |
| 312. | TG 15:0_16:0_18:2 |
| 313. | TG 15:0_16:1_18:1 |
| 314. | TG 14:0_17:1_18:1 |
| 315. | TG 15:1_16:0_18:1 |
| 316. | TG 16:0_16:1_17:1 |
| 317. | TG 15:0_17:1_17:1 |
| 318. | TG 15:1_17:0_17:1 |
| 319. | TG 16:1_16:1_17:0 |
| 320. | TG 16:1_16:1_17:1 |
| 321. | TG 16:0_16:0_18:0 |
| 322. | TG 14:0_18:0_18:0 |
| 323. | TG 16:0_16:0_18:1 |
| 324. | TG 14:0_18:0_18:1 |
| 325. | TG 16:0_16:1_18:1 |
| 326. | TG 14:0_18:1_18:1 |
| 327. | TG 14:0_18:0_18:2 |
| 328. | TG 16:0_16:0_18:2 |
| 329. | TG 16:1_16:1_18:0 |
| 330. | TG 14:0_18:1_18:2 |
| 331. | TG 14:1_18:1_18:1 |
| 332. | TG 16:1_16:1_18:1 |
| 333. | TG 16:0_16:1_18:2 |
| 334. | TG 16:0_16:0_18:3 |
| 335. | TG 14:0_16:0_20:3 |
| 336. | TG 14:1_18:1_18:2 |
| 337. | TG 14:0_18:2_18:2 |
| 338. | TG 14:0_16:0_20:4 |
| 339. | TG 16:0_17:0_18:0 |
| 340. | TG 15:0_18:0_18:0 |
| 341. | TG 15:0_17:0_19:0 |
| 342. | TG 16:0_16:0_19:0 |
| 343. | TG 17:0_17:0_17:0 |
| 344. | TG 16:0_17:0_18:1 |
| 345. | TG 15:0_18:0_18:1 |
| 346. | TG 15:0_17:0_19:1 |
| 347. | TG 16:0_17:1_18:0 |
| 348. | TG 16:0_16:0_19:1 |
| 349. | TG 17:0_17:0_17:1 |

|      |                   |
|------|-------------------|
| 350. | TG 16:0_17:1_18:1 |
| 351. | TG 15:0_18:1_18:1 |
| 352. | TG 16:1_17:0_18:1 |
| 353. | TG 15:0_18:0_18:2 |
| 354. | TG 16:0_17:1_18:2 |
| 355. | TG 15:0_18:1_18:2 |
| 356. | TG 15:1_18:1_18:1 |
| 357. | TG 16:1_17:1_18:1 |
| 358. | TG 17:1_17:1_17:1 |
| 359. | TG 16:0_18:0_18:0 |
| 360. | TG 14:0_18:0_20:0 |
| 361. | TG 17:0_17:0_18:0 |
| 362. | TG 16:0_16:0_20:0 |
| 363. | TG 16:0_18:0_18:1 |
| 364. | TG 16:0_16:0_20:1 |
| 365. | TG 17:0_17:0_18:1 |
| 366. | TG 16:0_18:1_18:1 |
| 367. | TG 16:1_18:0_18:1 |
| 368. | TG 16:0_18:0_18:2 |
| 369. | TG 16:0_18:1_18:2 |
| 370. | TG 16:1_18:1_18:1 |
| 371. | TG 17:1_17:1_18:1 |
| 372. | TG 16:0_16:0_20:3 |
| 373. | TG 16:1_18:1_18:2 |
| 374. | TG 16:0_18:2_18:2 |
| 375. | TG 16:0_18:1_18:3 |
| 376. | TG 16:0_16:0_20:4 |
| 377. | TG 16:0_18:0_19:0 |
| 378. | TG 17:0_18:0_18:0 |
| 379. | TG 16:0_17:0_20:0 |
| 380. | TG 16:0_16:0_21:0 |
| 381. | TG 17:0_17:0_19:0 |
| 382. | TG 17:0_18:0_18:1 |
| 383. | TG 16:0_18:1_19:0 |
| 384. | TG 16:0_18:0_19:1 |
| 385. | TG 17:1_18:0_18:0 |
| 386. | TG 17:0_17:1_19:0 |
| 387. | TG 17:0_17:0_19:1 |
| 388. | TG 17:1_18:0_18:1 |
| 389. | TG 17:0_18:1_18:1 |
| 390. | TG 16:0_18:1_19:1 |
| 391. | TG 17:0_17:1_19:1 |
| 392. | TG 17:0_18:0_18:2 |
| 393. | TG 16:0_18:2_19:0 |

|      |                   |
|------|-------------------|
| 394. | TG 17:1_17:1_19:0 |
| 395. | TG 17:1_18:1_18:1 |
| 396. | TG 17:0_18:1_18:2 |
| 397. | TG 16:0_18:2_19:1 |
| 398. | TG 17:1_17:1_19:1 |
| 399. | TG 17:1_18:1_18:2 |
| 400. | TG 17:0_18:1_18:3 |
| 401. | TG 17:0_18:2_18:2 |
| 402. | TG 16:0_18:0_20:0 |
| 403. | TG 18:0_18:0_18:0 |
| 404. | TG 16:0_16:0_22:0 |
| 405. | TG 18:0_18:0_18:1 |
| 406. | TG 16:0_18:0_20:1 |
| 407. | TG 16:0_18:1_20:0 |
| 408. | TG 18:0_18:1_18:1 |
| 409. | TG 18:0_18:0_18:2 |
| 410. | TG 18:1_18:1_18:1 |
| 411. | TG 18:0_18:1_18:2 |
| 412. | TG 18:1_18:1_18:2 |
| 413. | TG 18:0_18:2_18:2 |
| 414. | TG 18:0_18:1_18:3 |
| 415. | TG 16:0_18:1_20:3 |
| 416. | TG 16:0_18:1_20:4 |
| 417. | TG 18:1_18:2_18:2 |
| 418. | TG 18:1_18:1_18:3 |
| 419. | TG 16:0_18:0_21:0 |
| 420. | TG 16:0_17:0_22:0 |
| 421. | TG 16:0_19:0_20:0 |
| 422. | TG 18:0_18:0_19:0 |
| 423. | TG 17:0_18:0_20:0 |
| 424. | TG 15:0_18:0_22:0 |
| 425. | TG 17:0_17:0_21:0 |
| 426. | TG 16:0_18:1_21:0 |
| 427. | TG 18:0_18:1_19:0 |
| 428. | TG 16:1_18:0_21:0 |
| 429. | TG 17:0_18:1_20:0 |
| 430. | TG 16:0_19:0_20:1 |
| 431. | TG 16:0_19:1_20:0 |
| 432. | TG 18:0_18:0_19:1 |
| 433. | TG 17:0_18:0_20:1 |
| 434. | TG 17:0_19:0_19:1 |
| 435. | TG 16:1_17:0_22:0 |
| 436. | TG 18:0_18:1_19:1 |
| 437. | TG 18:1_18:1_19:0 |



|      |                   |
|------|-------------------|
| 438. | TG 18:1_18:1_19:1 |
| 439. | TG 16:0_18:0_22:0 |
| 440. | TG 18:0_18:0_20:0 |
| 441. | TG 16:0_20:0_20:0 |
| 442. | TG 16:0_16:0_24:0 |
| 443. | TG 18:0_18:1_20:0 |
| 444. | TG 16:0_18:1_22:0 |
| 445. | TG 16:0_18:0_22:1 |
| 446. | TG 16:0_20:0_20:1 |
| 447. | TG 18:0_18:0_20:1 |
| 448. | TG 16:0_18:1_22:1 |
| 449. | TG 18:0_18:1_20:1 |
| 450. | TG 18:1_18:1_20:0 |
| 451. | TG 16:1_18:1_22:0 |
| 452. | TG 16:0_20:1_20:1 |
| 453. | TG 16:1_20:0_20:1 |
| 454. | TG 18:0_18:2_20:0 |
| 455. | TG 16:1_18:0_22:1 |
| 456. | TG 18:0_19:1_19:1 |
| 457. | TG 16:0_18:2_22:0 |
| 458. | TG 18:1_18:1_20:1 |
| 459. | TG 18:1_18:2_20:0 |
| 460. | TG 18:0_18:1_20:2 |
| 461. | TG 18:0_18:2_20:1 |
| 462. | TG 16:0_20:1_20:2 |
| 463. | TG 18:1_18:1_20:2 |
| 464. | TG 18:0_18:1_20:3 |
| 465. | TG 18:0_18:1_20:4 |
| 466. | TG 18:1_18:1_20:3 |
| 467. | TG 16:0_18:0_22:5 |
| 468. | TG 18:1_18:1_20:4 |
| 469. | TG 16:0_18:1_22:5 |
| 470. | TG 18:0_18:0_21:0 |
| 471. | TG 17:0_18:0_22:0 |
| 472. | TG 18:0_18:1_21:0 |
| 473. | TG 16:0_18:1_23:1 |
| 474. | TG 17:0_18:1_22:1 |
| 475. | TG 18:1_18:1_21:0 |
| 476. | TG 15:0_20:1_22:1 |
| 477. | TG 17:0_20:1_20:1 |
| 478. | TG 18:0_18:0_22:0 |
| 479. | TG 18:0_20:0_20:0 |
| 480. | TG 16:0_20:0_22:0 |
| 481. | TG 18:0_18:1_22:0 |

|      |                                  |
|------|----------------------------------|
| 482. | TG 18:0_18:0_22:1                |
| 483. | TG 18:0_18:1_22:1                |
| 484. | TG 18:1_18:1_22:0                |
| 485. | TG 18:1_18:1_22:1                |
| 486. | TG 18:0_18:2_22:1                |
| 487. | TG 18:1_20:0_22:0                |
| 488. | TG 18:0_20:0_22:1                |
| 489. | TG 16:0_22:0_22:1                |
| 490. | TG 18:1_20:1_22:0                |
| 491. | TG 18:1_18:1_24:1                |
| 492. | TG 16:0_18:1_28:0                |
| 493. | TG 18:0_18:1_26:0                |
| 494. | Cho Der - [C33H54O6+H] 1+        |
| 495. | Cho Der - [C33H56O6+H] 1+        |
| 496. | Steryl esters [C43H74O7+H]<br>1+ |

F. Lipid IDs found only in Jafarabadi (J)

|     |                   |
|-----|-------------------|
| 1.  | TG 4:0_4:0_15:0   |
| 2.  | TG 2:0_4:0_18:0   |
| 3.  | TG 2:0_4:0_18:1   |
| 4.  | TG 4:0_4:0_16:1   |
| 5.  | TG 4:0_4:0_18:2   |
| 6.  | TG 4:0_6:0_16:2   |
| 7.  | TG 4:0_6:0_18:2   |
| 8.  | TG 4:0_8:0_16:2   |
| 9.  | TG 4:0_16:1_16:2  |
| 10. | TG 2:0_18:0_18:0  |
| 11. | TG 4:0_16:0_21:0  |
| 12. | TG 9:0_14:0_18:0  |
| 13. | TG 5:0_18:0_18:2  |
| 14. | TG 4:0_18:1_20:4  |
| 15. | TG 12:0_16:0_19:0 |
| 16. | TG 14:0_14:0_19:0 |
| 17. | TG 15:0_15:1_17:0 |
| 18. | TG 13:0_16:1_18:1 |
| 19. | TG 13:0_16:0_18:2 |
| 20. | TG 13:0_17:1_17:1 |
| 21. | TG 12:0_18:0_18:2 |
| 22. | TG 16:0_16:1_18:3 |

|     |                   |
|-----|-------------------|
| 23. | TG 1:0_16:0_18:4  |
| 24. | TG 14:0_18:0_21:0 |
| 25. | TG 14:0_17:0_22:0 |
| 26. | TG 14:0_19:0_20:0 |
| 27. | TG 16:1_18:1_19:1 |
| 28. | TG 17:2_18:1_18:1 |
| 29. | TG 17:1_18:1_19:1 |
| 30. | TG 15:0_19:1_21:0 |
| 31. | TG 16:0_18:2_21:0 |
| 32. | TG 18:1_18:2_19:0 |
| 33. | TG 18:0_18:2_19:1 |
| 34. | TG 14:0_20:1_22:0 |
| 35. | TG 18:0_18:2_21:0 |
| 36. | TG 18:0_18:2_22:0 |
| 37. | TG 16:1_20:0_22:2 |
| 38. | TG 16:0_16:0_30:0 |

|                                                  |
|--------------------------------------------------|
| G. Lipid IDs found only in Holstein Friesian (H) |
|--------------------------------------------------|

|     |                   |
|-----|-------------------|
| 1.  | TG 12:0_14:1_14:1 |
| 2.  | TG 12:0_12:0_20:0 |
| 3.  | TG 14:1_15:0_15:0 |
| 4.  | TG 14:1_14:1_16:0 |
| 5.  | TG 14:1_14:1_18:0 |
| 6.  | TG 14:1_16:1_17:0 |
| 7.  | TG 14:1_16:0_18:0 |
| 8.  | TG 15:1_15:1_19:0 |
| 9.  | TG 15:0_16:0_20:0 |
| 10. | TG 14:0_17:0_20:0 |
| 11. | TG 15:0_17:0_21:0 |
| 12. | TG 16:0_19:1_20:1 |
| 13. | TG 17:1_18:1_20:1 |
| 14. | TG 17:1_19:1_19:1 |
| 15. | TG 16:0_18:0_22:3 |
| 16. | TG 16:0_18:3_22:0 |
| 17. | TG 18:0_19:1_22:0 |
| 18. | TG 19:1_20:0_20:0 |
| 19. | TG 18:0_20:1_22:0 |
| 20. | TG 20:0_20:0_20:1 |
| 21. | TG 20:0_20:1_20:1 |
| 22. | SM d32:1          |
| 23. | SM d38:2          |

|     |          |
|-----|----------|
| 24. | SM d42:2 |
|-----|----------|

|                                        |
|----------------------------------------|
| H. Lipid IDs in Jafarabadi Summer (JS) |
|----------------------------------------|

|     |                   |
|-----|-------------------|
| 1.  | TG 12:0_15:0_19:1 |
| 2.  | TG 12:0_17:0_17:1 |
| 3.  | TG 14:0_15:0_17:1 |
| 4.  | TG 13:0_15:0_19:0 |
| 5.  | TG 12:0_14:0_21:0 |
| 6.  | TG 13:0_13:0_21:0 |
| 7.  | TG 14:0_15:0_20:1 |
| 8.  | TG 15:1_17:1_17:1 |
| 9.  | TG 15:1_16:1_18:1 |
| 10. | TG 14:0_14:0_22:1 |
| 11. | TG 15:0_15:0_20:1 |
| 12. | TG 14:0_18:1_19:0 |
| 13. | TG 14:0_18:0_19:1 |
| 14. | TG 14:0_18:1_19:1 |
| 15. | TG 15:1_17:1_19:1 |
| 16. | TG 17:1_17:1_18:0 |
| 17. | TG 17:0_17:2_18:2 |
| 18. | TG 16:1_18:1_19:0 |
| 19. | TG 16:1_18:0_19:1 |
| 20. | TG 15:1_19:0_19:1 |
| 21. | TG 14:1_19:0_20:1 |
| 22. | TG 15:1_18:0_20:1 |
| 23. | TG 16:1_19:0_19:0 |
| 24. | TG 16:0_19:1_19:1 |
| 25. | TG 17:2_18:2_19:0 |
| 26. | TG 17:1_18:1_21:0 |
| 27. | TG 16:0_19:1_22:0 |
| 28. | TG 17:0_19:1_21:0 |
| 29. | TG 17:1_18:1_22:0 |
| 30. | TG 18:1_19:1_20:0 |
| 31. | TG 16:1_19:1_22:0 |
| 32. | TG 17:0_18:2_22:0 |
| 33. | TG 17:1_20:0_20:1 |
| 34. | TG 18:0_18:0_22:2 |
| 35. | PE 34:2           |
| 36. | SM d33:2          |
| 37. | SM d41:2          |

|     |           |
|-----|-----------|
| 38. | SM dd36:0 |
| 39. | SM dd36:2 |

### I. Lipid IDs in Jafarabadi Winter (JW)

|     |                   |
|-----|-------------------|
| 1.  | DG 16:0_20:1_0:0  |
| 2.  | DG 18:1_18:2_0:0  |
| 3.  | TG 4:0_5:0_16:0   |
| 4.  | TG 4:0_10:0_11:0  |
| 5.  | TG 6:0_9:0_10:0   |
| 6.  | TG 3:0_9:0_13:0   |
| 7.  | TG 2:0_6:0_20:1   |
| 8.  | TG 7:0_9:0_13:0   |
| 9.  | TG 8:0_12:0_16:2  |
| 10. | TG 6:0_14:0_21:0  |
| 11. | TG 13:0_14:1_16:0 |
| 12. | TG 12:0_14:0_18:3 |
| 13. | TG 12:0_12:0_20:3 |
| 14. | TG 13:0_14:1_18:1 |
| 15. | TG 13:0_14:0_18:2 |
| 16. | TG 14:0_14:1_17:1 |
| 17. | TG 13:0_16:1_16:1 |
| 18. | TG 12:0_14:1_19:1 |
| 19. | TG 12:0_12:0_22:0 |
| 20. | TG 12:0_16:1_18:2 |
| 21. | TG 12:0_14:0_20:3 |
| 22. | TG 14:1_15:0_18:0 |
| 23. | TG 15:0_15:1_17:1 |
| 24. | TG 13:0_15:1_19:1 |
| 25. | TG 12:0_18:0_18:0 |
| 26. | TG 12:0_14:0_22:0 |
| 27. | TG 12:0_16:0_20:4 |
| 28. | TG 12:0_18:1_18:3 |
| 29. | TG 12:0_18:2_18:2 |
| 30. | TG 14:0_16:0_19:0 |
| 31. | TG 14:0_15:0_20:0 |
| 32. | TG 15:0_15:0_19:0 |
| 33. | TG 12:0_18:0_19:0 |
| 34. | TG 15:1_16:0_18:2 |
| 35. | TG 13:0_18:1_18:2 |
| 36. | TG 15:0_16:0_19:0 |
| 37. | TG 14:0_17:0_19:0 |
| 38. | TG 16:0_18:0_16:0 |

|     |                   |
|-----|-------------------|
| 39. | TG 14:0_16:1_20:3 |
| 40. | TG 16:1_17:0_18:0 |
| 41. | TG 15:0_18:1_18:3 |
| 42. | TG 15:0_18:2_18:2 |
| 43. | TG 16:0_17:0_19:0 |
| 44. | TG 14:0_19:0_19:0 |
| 45. | TG 16:1_17:0_19:0 |
| 46. | TG 16:0_17:0_19:1 |
| 47. | TG 16:0_17:1_19:0 |
| 48. | TG 17:0_17:1_18:0 |
| 49. | TG 17:1_17:1_18:2 |
| 50. | TG 14:0_18:1_20:4 |
| 51. | TG 16:0_18:2_18:3 |
| 52. | TG 16:1_18:1_18:3 |
| 53. | TG 16:0_18:1_18:4 |
| 54. | TG 16:1_16:1_20:3 |
| 55. | TG 17:1_17:2_19:1 |
| 56. | TG 18:1_18:2_18:3 |
| 57. | TG 18:2_18:2_18:2 |
| 58. | TG 17:1_18:1_20:0 |
| 59. | TG 16:0_19:1_20:2 |
| 60. | TG 18:1_18:2_19:1 |
| 61. | TG 18:1_18:3_19:0 |
| 62. | TG 18:2_18:2_19:0 |
| 63. | TG 18:1_19:0_19:0 |
| 64. | TG 16:1_18:0_22:3 |
| 65. | TG 18:1_18:2_20:3 |
| 66. | TG 16:0_18:2_22:4 |
| 67. | TG 16:0_20:3_20:3 |
| 68. | TG 18:1_20:0_20:2 |
| 69. | TG 18:2_20:0_20:1 |
| 70. | TG 16:0_20:2_22:1 |
| 71. | TG 16:1_20:2_22:0 |
| 72. | TG 18:0_20:1_20:2 |
| 73. | TG 18:0_20:0_21:0 |
| 74. | TG 18:0_19:0_22:0 |
| 75. | TG 16:0_21:0_22:0 |
| 76. | TG 17:0_20:0_22:0 |
| 77. | TG 19:0_20:0_20:0 |
| 78. | TG 19:0_19:0_21:0 |
| 79. | TG 17:0_21:0_21:0 |
| 80. | TG 18:0_20:0_22:0 |
| 81. | TG 20:0_20:0_20:0 |
| 82. | TG 19:0_19:1_23:0 |

|     |                            |
|-----|----------------------------|
| 83. | TG 16:0_19:1_26:0          |
| 84. | TG 20:0_20:1_21:0          |
| 85. | TG 19:1_21:0_21:0          |
| 86. | TG 16:0_18:0_28:0          |
| 87. | TG 18:0_18:2_26:0          |
| 88. | Cho Der - [C27H44O6+H] 1+  |
| 89. | Cho Der - [C27H48O6+Na] 1+ |
| 90. | Cho Der - [C33H58O6+Na] 1+ |
| 91. | Cho Der - 20:0             |
| 92. | Cho Der - 22:0             |
| 93. | Cho Der - 22:1             |

J. Lipid IDs in Holstein Friesian Summer (HS)

|     |                   |
|-----|-------------------|
| 1.  | TG 12:0_14:1_19:0 |
| 2.  | TG 15:1_15:1_16:0 |
| 3.  | TG 12:0_17:0_18:2 |
| 4.  | TG 15:0_15:0_17:2 |
| 5.  | TG 14:0_16:0_17:2 |
| 6.  | TG 13:0_17:0_18:0 |
| 7.  | TG 12:0_16:1_20:1 |
| 8.  | TG 16:0_16:0_17:2 |
| 9.  | TG 16:0_17:1_17:1 |
| 10. | TG 16:0_16:1_19:1 |
| 11. | TG 16:1_17:0_20:0 |
| 12. | TG 18:0_18:0_18:4 |
| 13. | TG 15:0_19:0_21:0 |
| 14. | TG 16:0_17:1_22:0 |
| 15. | TG 17:0_17:1_21:0 |
| 16. | TG 17:1_19:0_19:0 |
| 17. | TG 18:0_18:2_20:3 |
| 18. | TG 18:0_18:1_22:3 |
| 19. | TG 18:1_21:0_21:0 |
| 20. | TG 16:1_22:0_22:0 |

|                                               |
|-----------------------------------------------|
| K. Lipid IDs in Holstein Friesian Winter (HW) |
|-----------------------------------------------|

|     |                   |
|-----|-------------------|
| 1.  | DG 12:0_16:0_0:0  |
| 2.  | TG 6:0_12:1_14:1  |
| 3.  | TG 7:0_14:0_14:1  |
| 4.  | TG 13:0_14:0_14:1 |
| 5.  | TG 12:0_12:0_17:1 |
| 6.  | TG 12:0_14:1_16:1 |
| 7.  | TG 14:0_14:1_14:1 |
| 8.  | TG 14:1_14:1_15:0 |
| 9.  | TG 12:0_12:0_22:1 |
| 10. | TG 12:0_14:1_20:0 |
| 11. | TG 14:1_15:0_17:0 |
| 12. | TG 10:1_18:0_18:2 |
| 13. | TG 12:0_15:0_20:1 |
| 14. | TG 13:0_14:0_20:1 |
| 15. | TG 11:0_18:1_18:1 |
| 16. | TG 14:0_15:0_19:0 |
| 17. | TG 15:0_16:0_17:1 |
| 18. | TG 13:0_17:1_19:1 |
| 19. | TG 14:1_17:1_18:1 |
| 20. | TG 15:0_17:0_18:1 |
| 21. | TG 16:0_17:0_17:1 |
| 22. | TG 15:0_16:0_19:1 |
| 23. | TG 14:0_17:0_19:1 |
| 24. | TG 15:0_17:1_18:0 |
| 25. | TG 16:1_17:0_17:0 |
| 26. | TG 14:1_18:0_18:2 |
| 27. | TG 14:0_18:0_18:3 |
| 28. | TG 15:1_18:0_18:1 |
| 29. | TG 15:1_17:1_19:0 |
| 30. | TG 15:1_18:0_18:2 |
| 31. | TG 14:0_16:0_22:1 |
| 32. | TG 14:0_18:1_20:0 |
| 33. | TG 14:0_18:0_20:1 |
| 34. | TG 14:0_18:1_20:1 |
| 35. | TG 16:0_16:1_20:1 |
| 36. | TG 14:0_16:1_22:1 |
| 37. | TG 16:1_17:1_19:0 |
| 38. | TG 16:0_16:0_20:2 |
| 39. | TG 14:0_16:0_22:2 |



|     |                   |
|-----|-------------------|
| 40. | TG 14:1_16:0_22:1 |
| 41. | TG 14:0_18:0_20:2 |
| 42. | TG 14:1_18:0_20:1 |
| 43. | TG 16:1_16:1_20:2 |
| 44. | TG 14:1_18:1_20:2 |
| 45. | TG 14:0_17:0_22:1 |
| 46. | TG 14:0_19:0_20:1 |
| 47. | TG 14:0_19:1_20:1 |
| 48. | TG 17:0_18:1_19:0 |
| 49. | TG 14:0_18:1_22:0 |
| 50. | TG 14:0_20:0_20:1 |
| 51. | TG 17:0_17:0_20:1 |
| 52. | TG 16:1_18:0_20:1 |
| 53. | TG 16:0_16:1_22:1 |
| 54. | TG 16:0_16:0_22:2 |
| 55. | TG 14:0_18:0_22:2 |
| 56. | TG 14:0_18:1_22:1 |
| 57. | TG 17:1_18:1_19:0 |
| 58. | TG 14:1_18:0_22:1 |
| 59. | TG 16:0_18:0_20:2 |
| 60. | TG 14:0_20:1_20:1 |
| 61. | TG 17:0_18:1_20:1 |
| 62. | TG 15:0_18:1_22:1 |
| 63. | TG 16:1_17:0_22:1 |
| 64. | TG 16:1_19:0_20:1 |
| 65. | TG 15:0_20:1_20:1 |
| 66. | TG 14:0_19:1_22:1 |
| 67. | TG 17:0_19:1_19:1 |
| 68. | TG 15:0_18:1_22:2 |
| 69. | TG 16:1_19:1_20:1 |
| 70. | TG 17:0_18:2_20:1 |
| 71. | TG 15:0_18:2_22:1 |
| 72. | TG 16:1_17:1_22:1 |
| 73. | TG 16:1_17:0_22:2 |
| 74. | TG 17:0_17:0_22:1 |
| 75. | TG 18:1_19:0_19:1 |
| 76. | TG 18:2_19:0_19:0 |
| 77. | TG 16:1_18:0_22:2 |
| 78. | TG 16:1_20:0_20:2 |
| 79. | TG 18:1_18:3_20:0 |
| 80. | TG 18:2_18:2_20:0 |
| 81. | TG 15:0_20:0_22:0 |
| 82. | TG 15:0_21:0_21:0 |
| 83. | TG 18:1_19:0_20:0 |

|      |                   |
|------|-------------------|
| 84.  | TG 15:0_20:0_22:1 |
| 85.  | TG 15:0_20:1_22:0 |
| 86.  | TG 17:0_20:0_20:1 |
| 87.  | TG 16:1_19:0_22:0 |
| 88.  | TG 16:0_20:1_21:0 |
| 89.  | TG 16:1_20:0_21:0 |
| 90.  | TG 17:1_19:0_21:0 |
| 91.  | TG 17:1_20:0_20:0 |
| 92.  | TG 17:1_18:1_22:1 |
| 93.  | TG 17:0_18:1_22:2 |
| 94.  | TG 17:0_18:2_22:1 |
| 95.  | TG 17:1_18:2_22:0 |
| 96.  | TG 18:1_19:0_20:2 |
| 97.  | TG 16:1_20:2_21:0 |
| 98.  | TG 16:0_19:1_22:2 |
| 99.  | TG 16:1_19:1_22:1 |
| 100. | TG 17:1_18:0_22:2 |
| 101. | TG 18:0_19:1_20:2 |
| 102. | TG 16:0_21:0_21:0 |
| 103. | TG 16:0_20:1_22:0 |
| 104. | TG 14:0_22:0_22:1 |
| 105. | TG 18:0_20:0_20:1 |
| 106. | TG 18:1_20:0_20:1 |
| 107. | TG 16:1_20:0_22:1 |
| 108. | TG 18:1_18:2_22:1 |
| 109. | TG 18:1_18:1_22:2 |
| 110. | TG 18:2_20:1_20:1 |
| 111. | TG 18:1_19:0_22:0 |
| 112. | TG 18:1_20:0_21:0 |
| 113. | TG 18:0_19:0_22:1 |
| 114. | TG 18:0_20:1_21:0 |
| 115. | TG 16:0_21:0_22:1 |
| 116. | TG 17:0_20:0_22:1 |
| 117. | TG 17:0_20:1_22:0 |
| 118. | TG 16:1_21:0_22:0 |
| 119. | TG 19:0_20:0_20:1 |
| 120. | TG 19:0_19:1_21:0 |
| 121. | TG 18:0_19:1_22:1 |
| 122. | TG 18:1_19:1_22:1 |
| 123. | TG 19:0_19:0_22:1 |
| 124. | TG 18:1_20:0_22:1 |
| 125. | TG 19:0_19:1_22:1 |
| 126. | TG 18:2_20:0_22:0 |
| 127. | TG 18:0_20:2_22:0 |

|     |                   |
|-----|-------------------|
| 128 | TG 19:1_19:1_22:0 |
| 129 | TG 20:0_20:0_20:2 |
| 130 | TG 16:0_22:1_22:2 |
| 131 | TG 18:0_20:2_22:1 |
| 132 | TG 18:0_20:1_22:2 |
| 133 | TG 19:1_20:2_21:0 |
| 134 | TG 18:0_21:0_22:1 |
| 135 | TG 18:1_21:0_22:0 |
| 136 | TG 19:0_20:0_22:1 |
| 137 | TG 18:1_22:0_22:1 |
| 138 | TG 18:0_22:1_22:1 |
| 139 | TG 16:0_18:2_28:0 |
| 140 | TG 20:1_20:1_22:0 |
| 141 | TG 18:2_22:0_22:0 |
| 142 | PC 34:1           |
| 143 | SM d34:2          |

## Abbreviation List

|     |            |                                                                   |
|-----|------------|-------------------------------------------------------------------|
| 1.  | FA         | Fatty acid                                                        |
| 2.  | LA         | Linoleic acid                                                     |
| 3.  | ALA        | $\alpha$ -linolenic acid (ALA)                                    |
| 4.  | PUFA       | Polyunsaturated fatty acids                                       |
| 5.  | (GC-MS)    | Gas chromatography coupled with a mass spectrometer               |
| 6.  | (LC-MS/MS) | Liquid chromatography coupled tandem mass spectrometry (LC-MS/MS) |
| 7.  | UPLC       | Ultra-performance liquid chromatography                           |
| 8.  | J          | Jafarabadi                                                        |
| 9.  | HF         | Holstein Friesian                                                 |
| 10. | FFA        | Free fatty acids                                                  |
| 11. | HRAM       | High-resolution accurate mass                                     |
| 12. | JW         | Jafarabadi winter                                                 |
| 13. | JS         | Jafarabadi summer                                                 |
| 14. | HFS        | Holstein Friesian summer                                          |
| 15. | HFW        | Holstein Friesian winter                                          |
| 16. | MS         | Mass spectrometry                                                 |
| 17. | PA-ID      | Partial-acyl identification                                       |
| 18. | FA-ID      | Full-acyl identification                                          |
| 19. | RI         | Relative intensity                                                |
| 20. | PA-ID      | Partial-acyl identification                                       |
| 21. | TG         | Triacylglycerol                                                   |
| 22. | DG         | Diacylglycerol                                                    |
| 23. | LM         | Lipids Maps                                                       |
| 24. | SDF        | Structure delay format                                            |
| 25. | PS         | Phosphatidylserine                                                |
| 26. | PC         | Phosphatidylcholine                                               |
| 27. | PE         | Phosphoethanolamine                                               |
| 28. | PI         | Phosphatidylinositol                                              |
| 29. | XIC        | Extracted ion chromatogram                                        |
| 30. | QQ         | Quantile-Quantile                                                 |
| 31. | HSD        | Honestly significant difference                                   |
| 32. | GUI        | Graphical user interface                                          |
| 33. | SM         | Sphingomyelin                                                     |
| 34. | Chol-Der   | Cholesterol derivatives                                           |
| 35. | PCA        | Principal Component Analysis                                      |
| 36. | PC1        | Principal Component 1                                             |
| 37. | PC2        | Principal Component 2                                             |
| 38. | HCA        | Hierarchical Cluster Analysis                                     |
| 39. | ANOVA      | Two-Way Analysis of Variance Analysis                             |
| 40. | DDA        | Data-dependent acquisition                                        |
| 41. | SFA        | Saturated fatty acids                                             |
| 42. | CV         | Coefficient of variations                                         |
| 43. | AFP        | Average fat percentage                                            |
| 44. | HESI       | Heated electrospray source                                        |

|     |     |                                        |
|-----|-----|----------------------------------------|
| 45. | HCD | Higher-energy collisional dissociation |
| 46. | NCE | Normalized collision energy            |
| 47. | AGC | Automatic gain control                 |
